# 1 **Quorum Sensing Regulates ‘swim-or-stick’ Lifestyle in the Phycosphere**

2 Cong Fei<sup>1</sup>, Michael A. Ochsenkühn<sup>1</sup>, Ahmed A. Shibl<sup>1</sup>, Ashley Isaac<sup>1</sup>, Changhai Wang<sup>2</sup>, Shady A.

3 Amin<sup>1\*</sup>

4 <sup>1</sup>Marine Microbial Ecology Lab, Biology Program, New York University Abu Dhabi, Abu Dhabi, United  
5 Arab Emirates

6 <sup>2</sup>College of Resources and Environmental Science, Nanjing Agriculture University, Nanjing, China

7  
8 **\*Corresponding author:** Dr. Shady. A. Amin, Marine Microbial Ecology Lab, Biology Program, New  
9 York University Abu Dhabi, Abu Dhabi, United Arab Emirates. E-mail: [samin@nyu.edu](mailto:samin@nyu.edu) (SAA), +971 2  
10 628 5743, PO Box 129188, NYU Abu Dhabi, Abu Dhabi, UAE.

11  
12 **Running title:** Quorum Sensing in the Phycosphere.

## 13 14 **Originality-significance statement**

15 Motility and biofilm formation are processes regulated by quorum sensing (QS) in bacteria. Both functions  
16 are believed to play an important role in interactions between bacteria and phytoplankton. Here, we show  
17 that two bacterial symbionts from the microbial community associated with a ubiquitous diatom switch  
18 their motile lifestyle to attached cells while an opportunist bacterium from the same community is incapable  
19 of attachment, despite possessing the genetic machinery to do so. Further work indicated that the  
20 opportunist lacks QS signal synthases while the symbionts produce three QS signals, one of which is mainly  
21 responsible for regulating symbiont colonization of the diatom microenvironment. These findings suggest  
22 that QS regulates colonization of diatom surfaces and further work on these model systems will inform our

23 understanding of particle aggregation and bacterial attachment to marine snow and how these processes  
24 influence the global carbon cycle.

## 25 **Summary**

26 Interactions between phytoplankton and bacteria play major roles in global biogeochemical cycles and  
27 oceanic nutrient fluxes. These interactions occur in the microenvironment surrounding phytoplankton cells,  
28 known as the phycosphere. Bacteria in the phycosphere use either chemotaxis or attachment to benefit from  
29 algal excretions. Both processes are regulated by quorum sensing (QS), a cell-cell signaling mechanism  
30 that uses small infochemicals to coordinate bacterial gene expression. However, the role of QS in regulating  
31 bacterial attachment in the phycosphere is not clear. Here, we isolated a *Sulfitobacter pseudonitzschiae* F5  
32 and a *Phaeobacter* sp. F10 belonging to the marine *Roseobacter* group and an *Alteromonas macleodii* F12  
33 belonging to Alteromonadaceae, from the microbial community of the ubiquitous diatom *Asterionellopsis*  
34 *glacialis*. We show that only the *Roseobacter* group isolates (diatom symbionts) can attach to diatom  
35 transparent exopolymeric particles. Despite all three bacteria possessing genes involved in motility,  
36 chemotaxis, and attachment, only *S. pseudonitzschiae* F5 and *Phaeobacter* sp. F10 possessed complete QS  
37 systems and could synthesize QS signals. Using UHPLC-MS/MS, we identified three QS molecules  
38 produced by both bacteria of which only 3-oxo-C<sub>16:1</sub>-HSL strongly inhibited bacterial motility and  
39 stimulated attachment in the phycosphere. These findings suggest that QS signals enable colonization of  
40 the phycosphere by algal symbionts.

41 **Keywords:** quorum sensing; diatoms; *Roseobacter* group; phycosphere

## 42 **Introduction**

43 Phytoplankton constitute the foundation of the marine food web as they are responsible for nearly half of  
44 primary production on Earth (Field et al., 1998). Through their ability to carry out photosynthesis,  
45 phytoplankton transform atmospheric carbon dioxide gas to organic matter (Simon et al., 2009) that is  
46 assimilated and remineralized by heterotrophic bacteria (Pomeroy, 1974; Burkhardt et al., 2014). In  
47 exchange, bacteria produce essential factors (e.g., vitamins) (Kazamia et al., 2012; Bertrand et al., 2015) to  
48 support the growth of phytoplankton (Amin et al., 2012). Cumulatively, phytoplankton-bacteria symbiosis  
49 is believed to play an important role in nutrient availability and major biogeochemical cycles (Buchan et  
50 al., 2014; Durham et al., 2019).

51 Several bacterial lineages have been consistently observed to co-occur with phytoplankton, such as  
52 members of the *Roseobacter* group, Gammaproteobacteria, and Flavobacteria (Wagner-Döbler and Biebl,  
53 2006; Teeling et al., 2012). Particularly, members of the *Roseobacter* group (hereafter roseobacters) have  
54 been shown consistently to form symbiotic relationships with phytoplankton (Amin et al., 2012). For  
55 example, roseobacters are adept at acquiring and assimilating phytoplankton metabolites (Miller et al.,  
56 2004) in exchange for a variety of cofactors. *Ruegeria pomeroyi* has been shown to assimilate organic sulfur  
57 compounds from the diatom *Thalassiosira pseudonana* in exchange for production of cobalamin, which is  
58 required for diatom growth (Durham et al., 2015). *Sulfitobacter pseudonitzschiae* SA11 produces the  
59 hormone indole-3-acetic acid (IAA) to enhance cell division of the diatom *Pseudo-nitzschia multiseriata*,  
60 which leads to an increase in carbon export by the diatom and the exchange of diatom-derived organosulfur  
61 compounds and bacterial ammonia (Amin et al., 2015). Other phytoplankton such as the coccolithophore,  
62 *Emiliana huxleyi*, display different morphologies in response to endogenous IAA (Labeeuw et al., 2016)  
63 and exhibit enhanced cell division by roseobacters-derived IAA (Segev et al., 2016; Bramucci et al., 2018).  
64 IAA is an endogenous hormone that regulates plant differentiation and is also produced and excreted by

65 plant symbionts and some plant pathogens to interfere with plant root differentiation (Spaepen et al., 2007;  
66 Spaepen and Vanderleyden, 2011). Although eukaryotic phytoplankton like diatoms and coccolithophores  
67 are unicellular and do not undergo differentiation as defined in multicellular eukaryotes, IAA appears to  
68 have evolved the ability to manipulate the cell cycle in both groups of organisms, with related bacteria  
69 playing an important role in eukaryotic IAA perception in both marine and rhizobial environments  
70 (Seymour et al., 2017). A prerequisite for these symbiotic exchanges to occur is the intimate spatial  
71 proximity between the phytoplankton host and its symbionts.

72 Chemical exchanges between bacteria and phytoplankton occur in the microenvironment immediately  
73 adjacent to phytoplankton cells, known as the phycosphere (Bell and Mitchell, 1972; Seymour et al., 2017).  
74 Phytoplankton continuously exude organic matter, sometimes up to 50% of the cell's total fixed carbon  
75 (Thornton, 2014). Consequently, the phycosphere is hypothesized to harbor a significantly higher amount  
76 of phytoplankton dissolved organic matter (DOM) relative to bulk seawater due to the exudation of DOM  
77 by phytoplankton cells, and due to the negligible effects of turbulence on the diffusion of exudates within  
78 the minute phycosphere (Seymour et al., 2017). This buildup of DOM ultimately leads to bacterial attraction  
79 and colonization of the phycosphere either via chemotaxis or random encounters with phytoplankton cells  
80 (Smriga et al., 2016). Once in the phycosphere, beneficial bacteria that produce metabolites essential to  
81 phytoplankton (Mayali et al., 2011) may gain an advantage by switching their free-living, planktonic  
82 lifestyle in bulk seawater to a surface-attached state on phytoplankton cells. On the other hand, opportunistic  
83 bacteria benefit from phytoplankton-derived DOM without providing apparent benefits to phytoplankton  
84 hosts (Mayali and Doucette, 2002). Compared to free-living cells, surface-associated cells have greater  
85 access to phytoplankton nutrients and gain protection against toxins, antibiotics, and other environmental  
86 stressors by forming a biofilm (Jefferson, 2004; Samo et al., 2018).

87 Successful colonization of the phycosphere can be enhanced by specific bacterial genetic traits, including  
88 chemotaxis, motility, and attachment to surfaces (Slightom and Buchan, 2009; Raina et al., 2019).  
89 Chemotaxis enables bacteria to sense changes in local concentrations of food and regulates motility  
90 accordingly. Motile bacteria generally exhibit strong chemotaxis to DOM released from phytoplankton  
91 (Miller and Belas, 2004; Miller et al., 2004; Stocker, 2012; Smriga et al., 2016), while motility and flagellar  
92 genes appear to be critical for attachment and biofilm development in many roseobacters (Miller and Belas,  
93 2006; Bruhn et al., 2007). In the phycosphere, many bacteria may have a biphasic ‘swim-or-stick’ lifestyle  
94 that enables them to rapidly find food sources while minimizing energy expenditures once the food is  
95 located. During the motile phase, bacteria use chemotaxis to locate phytoplankton cells (Seymour et al.,  
96 2017). Once in the phycosphere, a ‘switch’ is turned on, causing a transition of the bacteria to a sessile  
97 lifestyle, whose phenotype includes loss of flagella and subsequent biofilm development (Geng and Belas,  
98 2010). Despite our knowledge of bacterial behavior, the mechanisms that regulate bacterial motility and  
99 attachment in the phycosphere have not been extensively investigated.

100 Quorum sensing (QS) is one of the best-studied signaling mechanisms for bacterial cell-to-cell  
101 communication. Many bacteria have been shown to carry out QS by secreting small signaling molecules,  
102 known as autoinducers, to assess changes in bacterial populations and to coordinate gene expression among  
103 a whole population (Waters and Bassler, 2005). In Proteobacteria, the primary class of autoinducers is acyl-  
104 homoserine lactones (AHLs), which are synthesized by an autoinducer synthase (LuxI) and perceived by  
105 an autoinducer regulator (LuxR) (Case et al., 2008). Bacteria use AHLs to regulate functions that are  
106 beneficial to carry out collectively, such as virulence, motility, and biofilm formation (Hammer and Bassler,  
107 2003; Daniels et al., 2004; Antunes et al., 2010). Indeed, several *Roseobacter*-group bacteria use AHLs to  
108 regulate motility, virulence, biofilm formation, and nutrient acquisition when associated with marine snow  
109 (Gram et al., 2002; Hmelo et al., 2011), red alga (Gardiner et al., 2015), and sponges (Zan et al., 2012). The  
110 addition of exogenous AHLs produced by bacterial epibionts to colonies of the cyanobacterium

111 *Trichodesmium* led to increases in the activity of alkaline phosphatase activity and consequently phosphorus  
112 acquisition (Van Mooy et al., 2012). In contrast, the lack of complete QS systems often leads to the inability  
113 of bacteria to attach to hosts. For example, a *luxR*-type gene knock-out strain of the *Roseobacter*-group  
114 member *Nautella italica* R11 was unable to form biofilms or attach to the red alga *Delisea pulchra*  
115 (Gardiner et al., 2015). Despite these examples, there is little direct evidence showing how QS regulates  
116 bacteria-phytoplankton interactions or how QS influences inter- and intraspecies interactions and behavior  
117 between bacteria within microbial consortia in the phycosphere. In this study, we examine how QS  
118 influences bacterial behavior in the phycosphere of the ubiquitous diatom, *Asterionellopsis glacialis*, and  
119 whether QS provides an advantage to beneficial bacteria relative to other bacteria. Here we hypothesize  
120 that QS regulates motility and attachment of beneficial bacteria, which may enhance their access to  
121 phytoplankton nutrients over non-beneficial bacteria.

122 *A. glacialis* is a ubiquitous diatom that has been isolated from every major water body around the world  
123 (Korner, 1970; Kaczmarek et al., 2014) and has recently been shown to be one of several abundant and  
124 widely distributed groups of diatoms from the Tara Oceans expedition (Malviya et al., 2016). In addition,  
125 *A. glacialis* often forms blooms and dense patches worldwide (Karentz and Smayda, 1984; Franco et al.,  
126 2016) that are characterized by high DOM secretions (Abreu et al., 2003), making this diatom an ideal  
127 model system to examine interactions with bacteria. Here, we characterize AHL molecules produced by  
128 bacteria isolated from the phycosphere of *A. glacialis* and examine the influence of these AHLs on the  
129 ability of beneficial and opportunistic bacteria to colonize the phycosphere of *A. glacialis*.

130

## 131 **Results and discussion**

### 132 **Bacterial attachment and influence on diatom physiology**

133 *A. glacialis* strain A3 (deposited as CCMP3542) was isolated from the Persian Gulf and identified as  
134 previously described (Behringer et al., 2018). Axenic *A. glacialis* strain A3 cultures were generated using  
135 antibiotics as described previously (Amin et al., 2015). Under optimal growth conditions, we noticed that  
136 axenic *A. glacialis* strain A3 mostly existed as single cells or chains with an average of approximately three  
137 cells per chain while xenic *A. glacialis* strain A3 at the same cell density ( $\sim 1.5 \times 10^5$  cells/mL) formed longer  
138 chains and/or aggregated cells (Supplementary Fig. S1A and S1B). Quantifying the abundance of diatom  
139 chains spanning 1-3 cells and >3 cells per chain in axenic and xenic cultures showed that chain length did  
140 not change appreciably throughout the growth of axenic cultures with roughly half the population  
141 forming >3 cells per chain. In contrast, bacteria significantly increased the abundance of longer diatom  
142 chains, with 79.4% of the population forming >3 cells per chain relative to axenic cultures in late-  
143 exponential to early-stationary phases (Supplementary Fig. S1C). In diatoms, current evidence suggests  
144 that chain length is influenced by increasing CO<sub>2</sub> concentrations (Ramos et al., 2014) and grazing pressure  
145 (Amato et al., 2018). The finding that bacteria can influence diatom chain length is novel and consistent  
146 with observations that bacteria can influence diatom cell size and morphology (Windler et al., 2014).

147 Removal of free-living bacteria in xenic *A. glacialis* cultures using gravity filtration through a 3- $\mu$ m  
148 membrane filter and staining filtered diatom and bacterial cells with SYBR Green I showed large aggregates  
149 of bacteria on and/or in close proximity to diatom cells (Supplementary Fig. S1D). Further staining of the  
150 sample with alcian blue, a dye that stains diatom transparent exopolymeric particles (TEP), showed that  
151 bacteria mostly attach to TEP (Supplementary Fig. S1E and S1F), an observation consistent with previous  
152 observations (Bar-Zeev et al., 2012). Generating biofilm on algal TEP and/or surfaces is a typical behavior  
153 of bacteria in aquatic habitats (Kogure et al., 1981; Bagatini et al., 2014) that can enable them to persist in  
154 such environments (Geng and Belas, 2010). Forming biofilm on algal surfaces or algal TEP also protects  
155 bacteria against toxins and antibiotics and provides shelter from predation (Carvalho, 2018). For example,  
156 bacteria residing in a biofilm can tolerate antimicrobial agents at concentrations 100-1000 times needed to

157 kill planktonic cells (Lewis, 2001). In addition, colonizing the phycosphere by attaching to TEP may help  
158 bacteria to conserve energy that would otherwise be spent on motility and chemotaxis to remain in  
159 proximity of the phycosphere (Seymour et al., 2017).

## 160 **Bacterial isolation**

161 To examine bacterial attachment and influence on diatom chain length in the phycosphere, three bacterial  
162 strains were isolated from xenic *A. glacialis* and characterized based on 16S rRNA sequence identity as  
163 *Sulfitobacter pseudonitzschiae* F5 (Rhodobacteraceae; >99% similarity to *S. pseudonitzschiae*),  
164 *Phaeobacter* sp. F10 (Rhodobacteraceae; 97% similarity to *Phaeobacter gallaeciensis*) and *Alteromonas*  
165 *macleodii* F12 (Alteromonadaceae; 99% similarity to *A. macleodii*) (Supplementary Fig. S2). The  
166 *Roseobacter* group (Rhodobacteraceae) is one of the most important groups of marine bacteria that  
167 primarily colonize both biotic (e.g., phytoplankton) and abiotic surfaces (e.g., marine snow) (Gram et al.,  
168 2002; Dang et al., 2008), and can comprise up to 25% of the marine bacterial community in some regions  
169 (Wagner-Döbler and Biebl, 2006). They have been shown to form a substantial component of the *A.*  
170 *glacialis* microbial consortium based both on 16S rRNA amplicon sequencing (Behringer et al., 2018) and  
171 shotgun metagenomics (Shibl et al., 2020). Mining the 16S rRNA sequences of the microbial community  
172 of *A. glacialis* recovered after 20 days of isolation from the field (Behringer et al., 2018), we recovered  
173 reads that display 100% sequence identity to the 16S rRNA gene of *Phaeobacter* sp. F10 and *A. macleodii*  
174 F12 and 99% sequence identity to *S. pseudonitzschiae* F5, indicating our bacterial isolates belong to the  
175 natural population of xenic *A. glacialis* and that members of this population persist through time under  
176 laboratory culturing conditions.

## 177 **Co-culture of bacterial isolates with the diatom**



178 To test whether these bacteria attach to *A. glacialis*, co-cultures of each bacterium with the diatom were  
179 grown in batch cultures, and growth and attachment of both partners were monitored using microscopy.  
180 When co-cultured with *A. macleodii* F12, the specific growth rate ( $\mu$ ) of the diatom did not exhibit  
181 significant changes relative to axenic controls ( $\mu_{\text{axenic}} = 1.02 \pm 0.05 \text{ d}^{-1}$ ;  $\mu_{\text{co-culture}} = 1.03 \pm 0.02 \text{ d}^{-1}$ )  
182 (Supplementary Fig. S3A). Likewise, the growth of the diatom did not vary significantly when co-cultured  
183 with *Phaeobacter* sp. F10 ( $\mu_{\text{axenic}} = 0.81 \pm 0.02 \text{ d}^{-1}$ ;  $\mu_{\text{co-culture}} = 0.84 \pm 0.04 \text{ d}^{-1}$ ) (Supplementary Fig. S3B). In  
184 contrast, *A. glacialis* co-cultured with *S. pseudonitzschiae* F5 exhibited a 27.6% increase in  $\mu$  relative to  
185 axenic controls ( $\mu_{\text{axenic}} = 0.76 \pm 0.03 \text{ d}^{-1}$ ;  $\mu_{\text{co-culture}} = 0.97 \pm 0.03 \text{ d}^{-1}$ ) (Supplementary Fig. S3C). In all co-  
186 cultures, bacteria exhibited  $\sim 3$  orders of magnitude increase in cell density, indicating uptake of diatom-  
187 derived organic matter (Supplementary Fig. S3D). Surprisingly, co-cultures of *S. pseudonitzschiae* F5 with  
188 *A. glacialis* showed a significant increase in longer diatom chains than axenic cultures, similar to  
189 observations in xenic cultures (Supplementary Fig. S1C). This observation may be a byproduct of enhanced  
190 growth of *A. glacialis* with *S. pseudonitzschiae* F5 or a result of a more complex mechanism of interaction.

191 *Sulfitobacter pseudonitzschiae* was first isolated from cultures of the toxigenic marine diatom *Pseudo-*  
192 *nitzschia multiseriis* obtained from the North Atlantic Ocean and the Pacific Northwest, with a model strain  
193 first coined as *Sulfitobacter* sp. SA11 (Amin et al., 2015). Subsequently, several additional *S.*  
194 *pseudonitzschiae* strains were isolated from the diatoms *Pseudo-nitzschia multiseriis*, *Skeletonema marinoi*  
195 and *A. glacialis* originating from the Atlantic Ocean, the Swedish coast, and the Persian Gulf, respectively  
196 (Hong et al., 2015; Töpel et al., 2019). These repetitive recoveries of nearly identical bacteria (>99% 16S  
197 rRNA sequence similarity) from three genera of diatoms that originated from starkly different locations  
198 with large variations in temperature, salinity and nutrients indicate that *S. pseudonitzschiae* is a globally  
199 distributed bacterium that may be a true symbiont of diatoms. *S. pseudonitzschiae* SA11 enhances the  
200 growth rate of the diatom *P. multiseriis* by 19-35% compared to axenic controls partially due to the activity  
201 of the hormone IAA, which *S. pseudonitzschiae* biosynthesizes from diatom-derived tryptophan. Both

202 organisms also exchange organosulfur compounds and ammonia to complement each other's metabolism  
203 (Amin et al., 2015). In this study, *S. pseudonitzschiae* F5 enhanced the growth rate of the diatom *A. glacialis*  
204 by 27.6% (Supplementary Fig. S3C). Further genome sequencing and annotation showed that *S.*  
205 *pseudonitzschiae* F5 also possesses three complete pathways for IAA biosynthesis from tryptophan  
206 (Supplementary Table S1), suggesting it may use the same strategy as *S. pseudonitzschiae* SA11 to enhance  
207 diatom growth.

208 Compared with *Sulfitobacter*, *Phaeobacter* species are known to colonize marine macro- and microalgal  
209 surfaces (e.g., *Ulva australis*, *Thalassiosira rotula*) (Rao et al., 2006; Thole et al., 2012). *P. inhibens* has  
210 been shown to control bacterial community assembly in the phycosphere of *T. rotula* (Majzoub et al., 2019).  
211 *P. inhibens* also produces the hormone IAA to promote the growth of the coccolithophore, *Emiliana*  
212 *huxleyi*, similar to *S. pseudonitzschiae* (Segev et al., 2016). *P. gallaeciensis* has been shown to lyse  
213 senescent *E. huxleyi* by producing algicidal compounds known as roseobactinoids (Seyedsayamdost et al.,  
214 2011). Although *Phaeobacter* sp. F10 did not enhance the growth rate of *A. glacialis* (Supplementary Figure  
215 S3B), metatranscriptomic analysis of a near-identical metagenomically assembled genome from the *A.*  
216 *glacialis* strain A3 microbial consortium indicates that *Phaeobacter* sp. F10 is also a symbiont of *A.*  
217 *glacialis* (Shibl et al., 2020).

218 Alteromonadaceae are widespread marine opportunistic copiotrophs (López-Pérez et al., 2012) that display  
219 algicidal activities with phytoplankton during algal blooms (Mayali and Azam, 2004). The  
220 *Pseudoalteromonas* and *Alteromonas* genera are known to effectively metabolize the organic matrix  
221 surrounding diatom frustules, exposing the silica shell to increased dissolution by the surrounding water  
222 (Bidle and Azam, 2001), and show strong algicidal activity by releasing dissolved substances (Mayali and  
223 Azam, 2004). For example, *A. colwelliana* shows growth inhibition and algicidal activity against the diatom  
224 *Chaetoceros calcitrans* (Kim et al., 1999). *A. macleodii* have been shown to degrade a variety of algal TEP

225 and exopolysaccharides (Koch et al., 2019) that may enable them to benefit from phytoplankton-derived  
226 carbon without contributing to phytoplankton metabolism. In addition, *A. macleodii* has been shown to  
227 compete for nitrate with the diatom *Phaeodacylum tricornutum* in the presence of organic carbon (Diner et  
228 al., 2016).

### 229 **Bacterial attachment in the phycosphere**

230 In order to test which bacterial strains attach to the diatom or TEP, we removed free-living bacterial cells  
231 from co-cultures of each strain with the diatom using gravity filtration through a 3- $\mu$ m membrane filter and  
232 stained TEP with alcian blue, and diatom and bacterial nucleic acids with SYBR Green I (Fig. 1). Both  
233 symbiotic strains, *S. pseudonitzschiae* F5 and *Phaeobacter* sp. F10, displayed strong attenuation onto filters,  
234 while no attached *A. macleodii* F12 were observed (Fig. 1D-1F). The composite images of bright field and  
235 fluorescence showed a strong attachment preference to diatom TEP of *S. pseudonitzschiae* F5 and  
236 *Phaeobacter* sp. F10 in co-cultures with *A. glacialis* as observed in xenic cultures (Fig. 1G-1H).  
237 Surprisingly, *A. macleodii* F12 did not show any attachment capacity to *A. glacialis* or TEP (Fig. 1) despite  
238 its ability to degrade algal polysaccharides (Koch et al., 2019). These observations suggest an inherent  
239 mechanism that enables the roseobacters but not *A. macleodii* to attach to TEP. To shed more light on such  
240 mechanisms, we sequenced the genomes of all three isolates.

### 241 **Genomic comparisons and AHLs identification**

242 The genomes of the three strains were obtained by a combination of PacBio and Illumina sequencing as  
243 described in the methods. The GC contents of both *Roseobacter* group member genomes were more similar  
244 to each other (61.8% for *S. pseudonitzschiae* F5 and 60.0% for *Phaeobacter* sp. F10), while *A. macleodii*  
245 F12 had a lower GC content (44.9%) (Table 1), consistent with the phylogenetic similarities of *S.*  
246 *pseudonitzschiae* F5 and *Phaeobacter* sp. F10 compared to *A. macleodii* F12 (Supplementary Fig. S2). *S.*

247 *pseudonitzschiae* F5 possessed the largest estimated genome size (5.1 Mb) compared to *Phaeobacter* sp.  
248 F10 (4.0 Mb) and *A. macleodii* F12 (4.7 Mb) (Table 1). Consistent with this observation, *S.*  
249 *pseudonitzschiae* F5 also had the greatest number of predicted genes (4991) compared with either  
250 *Phaeobacter* sp. F10 (3878) or *A. macleodii* F12 (4654) (Supplementary Fig. S4A). A major difference  
251 between the three genomes was the apparent higher number of putative genes involved in membrane  
252 transport of substrates, particularly primary active transporters (e.g., amino acids, sugars) (Mishra et al.,  
253 2014). For example, the relative abundance of putative membrane transporters in the *S. pseudonitzschiae*  
254 F5 genome is 10.50% compared to *Phaeobacter* sp. F10 (8.44%) or *A. macleodii* F12 (7.05%) when  
255 normalized to genome size, with primary active transporters being the most abundant in the roseobacters'  
256 genomes but not in *A. macleodii* F12 (Supplementary Fig. S4B). This observation suggests that both  
257 symbionts are more attuned to phycosphere metabolites than *A. macleodii* F12.

258 Chemotaxis, motility, and attachment presumably contribute to successful colonization of phytoplankton  
259 surfaces. To examine the ability of all three bacteria to interact with the diatom phycosphere, we conducted  
260 a genome-wide analysis to compare genes involved in bacterial chemotaxis, motility, attachment, and  
261 quorum sensing. All three genomes contained four chemotaxis genes in a single operon-like structure (*cheA*,  
262 *cheR*, *cheW*, and *cheY*), while a fifth gene, *cheB*, was present in *Phaeobacter* sp. F10 and *A. macleodii* F12,  
263 but absent in *S. pseudonitzschiae* F5 (Fig. 2A and Supplementary Table S2). *CheAYW* together mediate a  
264 signal transduction cascade that functions to regulate flagellar motors, while *cheB* and *cheR* together  
265 regulate the methylation state of methyl-accepting chemotaxis proteins (Wuichet et al., 2007). Flagellar  
266 genes were present in all three genomes, although *S. pseudonitzschiae* F5 and *Phaeobacter* sp. F10 also  
267 contained a suite of flagellar structure genes absent in *A. macleodii* F12 (*flgN*, *fliG*, *flgJ*, *motB*, and  
268 MotA/TolQ/ExbB proton channel family protein). In addition, both *S. pseudonitzschiae* F5 and  
269 *Phaeobacter* sp. F10 contained 11 genes related to pilus formation in contrast to *A. macleodii* F12, which  
270 only contained a pilin *flp* gene, which is involved in pilus formation (Bardy et al., 2003). For attachment,

271 genes involved in exopolysaccharide production and biofilm formation were distributed throughout the  
272 genomes of the three bacteria (Fig. 2A and Supplementary Table S2). These lines of evidence suggest that  
273 *S. pseudonitzschiae* F5, *Phaeobacter* sp. F10, and *A. macleodii* F12 have the ability to carry out chemotaxis,  
274 construct flagella and pili structures, and form biofilm. Despite this observation, *A. macleodii* F12 did not  
275 attach to *A. glacialis* or TEP produced by *A. glacialis* (Fig. 1).

276 Quorum sensing (QS) autoinducers (e.g., AHLs) have been widely shown to modulate important biological  
277 functions, such as biofilm formation and motility (Bassler, 2002; Waters and Bassler, 2005), indicating QS  
278 may be able to regulate bacterial ‘swim-or-stick’ lifestyles in the phycosphere and suggesting that *A.*  
279 *macleodii* F12 may lack a functioning QS system. Indeed, *luxI*-like genes that are responsible for  
280 biosynthesizing AHLs were only present in *S. pseudonitzschiae* F5 (2 homologs) and *Phaeobacter* sp. F10  
281 (1 homolog), while *A. macleodii* F12 completely lacked apparent *luxI* homologs (Fig. 2B and  
282 Supplementary Table S2). Indeed, *luxI* is rarely present in *Alteromonas* species. We found only two of 67  
283 genomes belonging to the Alteromonadaceae that are publicly available contain putative AHL synthases.  
284 In addition to AHL synthesis, a transcriptional regulator, encoded by a *luxR* gene, is required to perceive  
285 AHLs and coordinate gene expression among bacterial populations. All three genomes contained *luxR*  
286 family genes, while *S. pseudonitzschiae* F5 possessed four putative *luxR*-family genes, *Phaeobacter* sp.  
287 F10 possessed six and *A. macleodii* F12 possessed only one (Fig. 2B and Supplementary Table S2).  
288 Typically, apparent *luxR* genes are found adjacent to or near a *luxI* gene on bacterial chromosomes in a  
289 single operon-like structure, such as in *S. pseudonitzschiae* F5 and *Phaeobacter* sp. F10 (Supplementary  
290 Table S2). However, some bacteria also have putative ‘solo’ *luxR* genes without associated putative *luxI*  
291 genes, which is the case in *A. macleodii* F12 and for the additional putative *luxR* homologs present in *S.*  
292 *pseudonitzschiae* F5 and *Phaeobacter* sp. F10. It has been hypothesized that bacteria possessing ‘solo’  
293 *luxR* genes do so to detect and respond to exogenous signals from other bacterial populations (Hudaiberdiev  
294 et al., 2015) or that these solo genes represent the loss of QS function (Subramoni and Venturi, 2009). Some

295 solo LuxR proteins have low specificity for AHL binding compared with LuxR proteins coupled with LuxIs  
296 (Subramoni and Venturi, 2009). For example, SdiA, a solo transcriptional regulator that is present in  
297 members of *Salmonella*, *Escherichia*, and *Klebsiella*, could bind seven different AHL molecules (Yao et  
298 al., 2006; Janssens et al., 2007). Potentially, the solo *luxR* genes in *A. macleodii* F12 and the symbionts may  
299 respond to a wide range of AHLs from other bacteria.

300 To characterize AHLs produced by *S. pseudonitzschiae* F5 and *Phaeobacter* sp. F10, we purchased a suite  
301 of commercially available AHL standards (Supplementary Table S2) and used ultra-high-performance  
302 liquid chromatography-tandem mass spectrometry (UHPLC-MS/MS) to identify potential AHLs in  
303 bacterial cultures. Three AHLs were recovered from *S. pseudonitzschiae* F5 and *Phaeobacter* sp. F10 pure  
304 culture supernatants with ionized parent masses of m/z 270.1700, 352.2480, and 354.2640 and identified  
305 as 3-oxo-C<sub>10</sub>-HSL, 3-oxo-C<sub>16:1</sub>-HSL and 3-oxo-C<sub>16</sub>-HSL, respectively, using high-resolution m/z values,  
306 daughter-ion fragmentation and retention times (Fig. 3 and Supplementary Fig. S5). No standard from the  
307 AHLs library matched any metabolite in the supernatant of *A. macleodii* F12, consistent with its lack of  
308 *luxI*-like genes (Fig. 2). We attempted to measure AHLs in co-cultures of the roseobacters and the diatom  
309 but due to the lower bacterial abundance in cocultures compared to pure bacterial cultures we were not  
310 successful in detecting AHLs. The identification of AHL production by diatom symbionts prompted  
311 examination of the influence of these signaling molecules on the ability of the symbionts to attach to diatom  
312 TEP.

### 313 **Influence of AHLs on bacterial motility and biofilm formation**

314 Cell attachment is the first step in the process of biofilm formation, which requires motility for initial  
315 attachment to surfaces (Slightom and Buchan, 2009). Consequently, we examined the influence of AHLs  
316 on motility and biofilm formation since both functions are regulated by QS in bacteria (Hammer and Bassler,  
317 2003; Daniels et al., 2004). All three AHLs and two QS inhibitors (QSIs), 2(5H)-furanone and furanone C-

318 30 (Ponnusamy et al., 2010; He et al., 2012), were used to test the motility and biofilm formation capabilities  
319 of *S. pseudonitzschiae* F5, *Phaeobacter* sp. F10, and *A. macleodii* F12. QSIs were used to confirm that any  
320 phenotypes observed using AHLs are due to QS regulation and not byproducts of other processes. Since  
321 the *A. macleodii* F12 genome contained a putative solo *luxR* gene (Fig. 2B), we suspected *A. macleodii* F12  
322 might still respond to AHLs produced by *S. pseudonitzschiae* F5 and *Phaeobacter* sp. F10 despite lacking  
323 the ability to synthesize AHLs.

324 The addition of 2  $\mu$ M of each AHL to each bacterium showed statistically significant inhibition of motility  
325 in *S. pseudonitzschiae* F5 and *Phaeobacter* sp. F10 ( $p < 0.01$ ) by all three AHLs, while both QSIs enhanced  
326 motility in *S. pseudonitzschiae* F5, as expected, and furanone C-30 enhanced motility in *Phaeobacter* sp.  
327 F10 (Fig. 4A and 4B). Specifically, 3-oxo-C<sub>16:1</sub>-HSL exhibited the strongest inhibition of motility in *S.*  
328 *pseudonitzschiae* F5 by 78.2% ( $p < 0.001$ ) compared to the two other AHLs (28.6% and 31.8%). Despite  
329 showing two AHLs, 3-oxo-C<sub>16</sub>-HSL and 3-oxo-C<sub>10</sub>-HSL, weakly inhibiting motility in *A. macleodii* F12,  
330 both QSIs also weakly inhibited its motility, suggesting *A. macleodii* F12 does not respond or weakly  
331 responds to QS molecules (Fig. 4A and 4B). Bacterial motility is characterized by a circular swimming  
332 zone in the motility assay or by dendritic morphology, which is typical for swarming motility caused by a  
333 locally restricted movement on agar plates (Michael et al., 2016). *Phaeobacter* sp. F10 and *A. macleodii*  
334 F12 displayed a typical circular swimming zone while *S. pseudonitzschiae* F5 displayed a dendritic motility  
335 phenotype (Fig. 4A).

336 To assess biofilm formation, a standardized crystal violet assay was conducted as described previously  
337 (O'toole and Kolter, 1998). Interestingly, 10  $\mu$ g/mL of 3-oxo-C<sub>16:1</sub>-HSL significantly enhanced biofilm  
338 formation in *S. pseudonitzschiae* F5 and *Phaeobacter* sp. F10 by 26.7% and 211%, respectively ( $p < 0.05$ ),  
339 while 3-oxo-C<sub>10</sub>-HSL and 3-oxo-C<sub>16</sub>-HSL did not influence biofilm formation in either bacteria (Fig. 4C).  
340 These results suggest each AHL molecule regulates different sets of functions. Similar observations have

341 been shown previously (Su et al., 2018; Hou et al., 2019). In contrast, both QSIs inhibited biofilm formation  
342 of *S. pseudonitzschiae* F5 by 52.2% and 21.9%, respectively, relative to the control. None of the AHLs  
343 influenced biofilm formation of *A. macleodii* F12 (Fig. 4C).

344 These findings suggest that specific AHLs produced by diatom symbionts promote bacterial colonization  
345 of the phycosphere by enhancing bacterial capacity to form biofilms and reduce motility, both are functions  
346 essential to successfully colonize the phycosphere. In contrast, *A. macleodii* F12 is unable to respond to  
347 these molecules or to effectively attach to TEP. Other mechanisms must also be functioning to further  
348 prevent opportunists, like *A. macleodii* F12, from benefitting from diatom exudates. One such mechanism  
349 is the regulation of microbial consortia by the eukaryotic host, *A. glacialis*. *A. glacialis* has recently been  
350 shown to release the unusual metabolites, rosmarinic acid and azelaic acid, in the phycosphere in response  
351 to bacteria (Shibl et al., 2020). Azelaic acid promoted the growth of both symbionts and concomitantly  
352 inhibited the growth of *A. macleodii* F12. Similarly, rosmarinic acid inhibited the motility of *S.*  
353 *pseudonitzschiae* F5 and *Phaeobacter* sp. F10 in an identical way to 3-oxo-C<sub>16:1</sub>-HSL, while upregulating  
354 motility in *A. macleodii* F12 (Shibl et al., 2020). Rosmarinic acid has been recently shown to interfere with  
355 QS in a plant pathogen (Hammer and Bassler, 2003), suggesting this molecule acts as a QSI. A similar  
356 mechanism of interfering with QS, a process known as quorum quenching, is used by the marine macroalga  
357 *Delisea pulchra* to inhibit swarming motility of *Serratia liquefaciens* by producing halogenated furanones  
358 (Rasmussen et al., 2000). Cumulatively, our observations suggest that *S. pseudonitzschiae* F5 and  
359 *Phaeobacter* sp. F10 switch their free-living mode to surface-attached mode to remain in the phycosphere  
360 by releasing AHLs. Combined with the diatom host release of unique secondary metabolites that further  
361 promote symbiont phycosphere colonization and inhibit colonization of opportunists, these mechanisms  
362 ensure diatoms are not prey to random encounters with opportunists and pathogens.

363 **QS gene homology and organization in the *Roseobacter* group**



364 To shed light on the prevalence of QS systems in the *Roseobacter* group, we constructed a phylogenetic  
365 tree of 52 sets of the LuxR-ITS-LuxI sequences (*luxRI* cassettes) in 32 *Roseobacter* group representative  
366 genomes. The tree revealed multiple conserved QS gene topologies that were distributed across the  
367 *Roseobacter* group (Fig. 5).

368 In Figure 5, half of the roseobacters genomes contained more than one pair of *luxRI* (18/31) and more than  
369 two AHL molecules were identified in nine strains. It has been shown that >80% of bacteria in the  
370 *Roseobacter* group possess at least one *luxRI* gene cassette (Buchan et al., 2016). *Phaeobacter* species  
371 consistently appear to produce more than three AHLs using 2–3 *luxI* homologs (Fig. 5 and Supplementary  
372 Table S3). For example, *Phaeobacter gallaeciensis* DSM 26640 produces up to 8 different AHLs via only  
373 three *luxI* homologs (Ziesche et al., 2015). Cude and Buchan (2013) provide a classification of the genetic  
374 makeup and organization of the *luxRI* gene cassettes and neighboring genes, with the B topology (B group)  
375 being the most common cassette structure (Fig. 5). In our work, B group contained 26 *luxRI* cassettes  
376 distributed in 26 genomes (Fig. 5). Both *S. pseudonitzschiae* F5 and *Phaeobacter* sp. F10 possess one  
377 cassette that belongs to this group, while a unique *luxRI* cassette only occurs in *S. pseudonitzschiae* F5.  
378 Interestingly, both *S. pseudonitzschiae* F5 and *Phaeobacter* sp. F10 strains produced the same three AHLs  
379 molecules (Fig. 3 and Supplementary Fig. S5), suggesting these molecules must be a byproduct of a  
380 homologous *luxI*, common to both *S. pseudonitzschiae* F5 and *Phaeobacter* sp. F10. This finding is  
381 consistent with previous studies showing that a single *luxI*-type gene is responsible for biosynthesizing  
382 more than one AHL molecule (Ortori et al., 2007; Hansen et al., 2015). LuxI proteins use S-  
383 adenosylmethionine (SAM) and acylated acyl-carrier protein (ACP) to catalyze the acylation and  
384 lactonization of AHL molecules (Churchill and Chen, 2011). Potentially, the *luxI* homolog common to *S.*  
385 *pseudonitzschiae* F5 and *Phaeobacter* sp. F10 does not discriminate well between different substrates and  
386 can accept acyl chains of varying lengths, enabling it to biosynthesize three AHLs. This lack of specificity  
387 could allow different AHL molecules produced by a single protein to bind different transcriptional

388 regulators and thus regulate different functions. By regulating the availability of substrates needed to make  
389 each AHL, different AHLs may be produced depending on the environmental condition while continuously  
390 expressing the same AHL synthase. For example, different temperatures have been shown to influence the  
391 types and concentrations of seven different AHLs produced by one *luxI* in the fish pathogen *Aliivibrio*  
392 *salmonicida* (Hansen et al., 2015). The diversity of substrates and selectivity levels of different *luxI*  
393 homologs also influence the proportions of various AHLs produced by roseobacters (Ziesche et al., 2018).  
394 *S. pseudonitzschiae* F5 and *Phaeobacter* sp. F10 were isolated from the same diatom, indicating horizontal  
395 gene transfer may be responsible for their identical production of AHLs. The second *luxI* gene in *S.*  
396 *pseudonitzschiae* F5 likely produces one or more other AHL molecules that we were not able to characterize  
397 due to the limitation of AHL mass spectrometry standards. As mentioned before, *S. pseudonitzschiae* F5  
398 displayed a dendritic motility phenotype, which is absent in most roseobacters (Bartling et al., 2018). It is  
399 not clear what ecological advantage dendritic motility have on bacteria like *S. pseudonitzschiae*.  
400 Interestingly, two additional *S. pseudonitzschiae* strains displayed this phenotype previously (Bartling et  
401 al., 2018), indicating this phenotype is common in this species for unknown reasons.

402 The phycosphere is a unique environment that enables the accumulation of organic molecules in close  
403 proximity to phytoplankton cells along with their associated bacterial populations. Mounting evidence  
404 indicates that DOM secretions by phytoplankton lead to the accumulation of higher bacterial density in the  
405 phycosphere when compared to bulk seawater (Blackburn et al., 1998; Smriga et al., 2016), which is the  
406 ideal scenario under which QS systems are activated. The isolation sources of bacteria in Figure 5 indicate  
407 that 37.5% of strains were isolated from a eukaryotic host and 21.9% from phytoplankton and that these  
408 roseobacters produce a wide variety of long-chain AHLs (C<sub>10</sub>-C<sub>18</sub>) (Supplementary Table S3). Long-chain  
409 AHLs are more stable in alkaline environments, such as the phycosphere, compared to short-chain AHLs  
410 (Yates et al., 2002). Thus, the production of long-chain AHLs by roseobacters in the phycosphere may lead

411 to a higher local concentration than short-chain AHLs, and thus enable roseobacters to respond collectively  
412 to the phycosphere environment more successfully than other bacteria.

413 Here, we have shown that two diatom symbionts use AHL molecules to inhibit their motility and enhance  
414 biofilm formation, processes that likely control their ability to attach to diatom TEP and thus colonize the  
415 phycosphere. In contrast, an opportunist bacterium was incapable of attaching to diatom TEP and was found  
416 to lack the ability to synthesize AHL molecules. The advantage of symbionts to switch their lifestyle from  
417 motile bacteria entering the phycosphere to permanent residents of this microenvironment is essential to  
418 marine bacteria that rely on phycosphere exudates to survive. This ‘swim-or-stick’ switch appears also to  
419 be partially controlled by diatoms that can make quorum sensing mimics, such as rosmarinic acid.  
420 Significant work is needed to delineate the importance of bacterial intraspecies signaling vs eukaryotic host  
421 interference in bacterial communication.

422

## 423 **Experimental procedures**

### 424 **Diatom growth**

425 *Asterionellopsis glacialis* strain A3 was deposited for this work in the National Center for Marine Algae  
426 and Microbiota (NCMA) under the accession number CCMP3542. Axenic *A. glacialis* strain A3  
427 (CCMP3542) was generated as described previously (Behringer et al., 2018). All diatom cultures were  
428 grown at 22°C in a 12:12 hour light/dark diurnal cycle ( $125 \mu\text{E m}^{-2} \text{s}^{-1}$ ) in semi-continuous batch cultures  
429 (Brand et al., 1981). Since *in vivo* fluorescence linearly correlates with cell numbers during exponential  
430 growth in batch cultures (Wood et al., 2005), diatom growth was monitored by measuring *in vivo*  
431 fluorescence of chlorophyll *a* (relative fluorescence units, RFU) using a 10-AU fluorimeter (Turner Designs,  
432 San Jose, CA, United States). Specific growth rates ( $\mu$ ) of diatoms were calculated from the linear regression

433 of the natural log of RFU versus time during the exponential growth phase of cultures. The standard  
434 deviation of  $\mu$  was calculated using values from biological replicates ( $n = 5$  unless otherwise indicated) over  
435 the exponential growth period. The relationship between cell density and RFU of *A. glacialis* strain A3 can  
436 be formulated with the following equation:  $y = 14.958x - 0.519$ , where  $y$  is cells/ $\mu$ L and  $x$  is the RFU value,  
437 calculated from the regression line of linear portion of the growth curve. The adjusted  $R^2$  value for this  
438 curve is 0.98 ( $p < 0.001$ ).

### 439 **Bacterial isolation, identification and phylogenetic analysis**

440 To assess whether specific bacteria attach to *A. glacialis* strain A3, we cultivated bacteria from the xenic *A.*  
441 *glacialis* strain A3 culture as described previously (Shibl et al., 2020). Briefly, bacteria were isolated from  
442 the diatom at early stationary phase by serially diluting 0.5 mL 1000 times in sterile f/2 media (Guillard,  
443 1975) and subsequently spreading 200  $\mu$ L onto (1) marine agar plates, (2) plates containing per liter of  
444 seawater: 15g agar and 2g carbon source (sodium succinate or glucose) and (3) sterilized *A. glacialis* strain  
445 A3 culture suspension with 1.5% agar. Plates were incubated at 25°C in the dark for 3-7 days and single  
446 colonies with unique morphologies were re-streaked 3 times to eliminate cross-contamination before  
447 storage at -80°C in 15% glycerol stocks.

448 Bacterial isolates were identified using direct PCR (Hofmann and Brian, 1991). Isolates were incubated in  
449 3 mL marine broth at 25°C in the dark until optical density (600 nm) reached 1.0; subsequently, 2  $\mu$ L of  
450 each bacterium was used as a DNA template in PCR. The 16S rRNA gene from all bacteria was amplified  
451 by universal primers (27F, 1492R) as previously described (Amin et al., 2015). PCR products were purified  
452 by the Wizard PCR purification kit (Promega) and sequenced using Sanger sequencing (Apical Scientific,  
453 Malaysia). Sequences were aligned with 16S rRNA sequences from GenBank using ClustalW Multiple  
454 Alignment in BioEdit 7.0.9.0. A neighbor-joining (NJ) phylogenetic tree was constructed with BIONJ  
455 (Gascuel, 1997) using Kimura's two-parameter model. Another tree was constructed using the

456 Maximum Likelihood (ML) methods using PhyML 3.0 (Guindon et al., 2010) with GTR+R+I substitution  
457 model as determined by SMS (Lefort et al., 2017). The final 16S rRNA phylogenetic consensus tree was  
458 generated and edited using FigTree 1.4.2 (Rambaut, 2014). 16S rRNA of strains *S. pseudonitzschiae* F5,  
459 *Phaeobacter* sp. F10, and *A. macleodii* F12 were compared with the microbial community of *A. glacialis*  
460 recovered after 20 days of isolation from the field (Behringer et al., 2018) using the BLASTn tool in  
461 BLAST+ (Camacho et al., 2009).

### 462 **Co-culture generation and growth**

463 For co-cultures, axenic *A. glacialis* strain A3 was inoculated from an acclimated, mid-exponential phase  
464 growing culture into 25 mL sterile f/2 media to achieve an initial diatom cell density of ~4,000 cells/mL.  
465 Bacteria were grown in marine broth (ZoBell, 1941) in the dark overnight from a single colony at 26°C and  
466 shaking at 180 rpm. Cultures were centrifuged at 4000 rpm for 10 min followed by washing twice with  
467 sterile f/2 medium. Subsequently, cultures were used to inoculate axenic *A. glacialis* cultures at an initial  
468 bacterial density of  $\sim 1 \times 10^4$  cells/mL. Bacterial counts in co-cultures were quantified by staining 1 mL fresh  
469 bacterial cells with 1x SYBR Safe stain (Edvotek Corp. USA), incubating stained samples in the dark at  
470 room temperature for one hour and using a CyFlow Space flow cytometer (Partec, Münster, Germany).  
471 Specific growth rates of diatoms were calculated as described above. Specific growth rates ( $\mu$ ) of bacteria  
472 were calculated from the linear regression of the natural log of cell counts from 2-6 days of cultures. The  
473 standard deviation of  $\mu$  was calculated using values from biological replicates ( $n = 3$  unless otherwise  
474 indicated).

### 475 **Bright-field and fluorescence microscopy**

476 To observe transparent exopolymeric particles (TEP) distribution and their attached bacteria, two staining  
477 steps were applied. Alcian blue was first used to stain TEP in diatom cultures. 1 mL culture in mid-

478 exponential phase was gently filtered by gravity onto 3- $\mu$ m 25 mm polycarbonate membrane filters  
479 (Whatman) to remove free-living bacteria ( $\sim 1 \mu$ m). Subsequently, 1 mL alcian blue in 0.06% glacial acetic  
480 acid (pH 2.5) was allowed to gently run down the tube wall onto the filter to stain samples for 10 min at  
481 room temperature (Long and Azam, 1996). Excess alcian blue was removed using a gentle wash with PBS  
482 buffer and gently filtered by gravity. Subsequently, filters that only contained diatoms ( $\sim 25 \mu$ m for a single  
483 cell), TEP particles and attached bacteria were fixed with Moviol-Sybr Green I as described previously  
484 (Lunau et al., 2005). Filters were visualized using a DMI6000B epifluorescence microscope (Leica) with a  
485 DMC2900 color brightfield camera (Leica). Bright-field microscopy was used for TEP observation.  
486 Fluorescence microscopy was used for bacteria and diatom nucleic acid observations. L5 fluorescence filter  
487 was used for SYBR green I staining of both bacterial and algal nucleic acids with an excitation wavelength  
488 range of 480 - 656 nm and an emission wavelength at 590 nm. Y5 fluorescence filter was used for algal  
489 chlorophyll autofluorescence with the excitation wavelength of 620 nm and an emission wavelength of 700  
490 nm. Both bright-field and fluorescence images were merged using LAS X software (Leica Microsystems,  
491 Germany). The chain length of axenic, xenic *A. glacialis* strain A3 and co-culture of the diatom with *S.*  
492 *pseudonitzschiae* F5 were quantified using an inverted microscope (Eclipse Ti-U, Nikon, Japan).

### 493 **Bacterial genome sequencing and assembly**

494 Genomic DNA of *S. pseudonitzschiae* F5, *Phaeobacter* sp. F10, and *A. macleodii* F12 were extracted from  
495 pure bacterial cultures using an E.Z.N.A. Bacterial DNA Kit (Omega BIO-TEK) according to the  
496 manufacturer's instructions. DNA yield and quality were measured and checked using a Qubit 3.0  
497 Fluorometer (Invitrogen; Life Technologies) and gel electrophoresis.

498 Genome sequencing of all three bacterial genomes was conducted using the Illumina and PacBio platforms  
499 at Apical Scientific Sdn. Bhd (Malaysia) for *S. pseudonitzschiae* F5 and *Phaeobacter* sp. F10 and at  
500 Novogene (China) for *A. macleodii* F12. In brief, 100~1000 ng DNA was fragmented by acoustic disruption

501 using a Covaris S220 system (Covaris, Woburn, MA) for Illumina sequencing. Subsequently, DNA libraries  
502 were built using a NEBNext® Ultra™ II DNA Library Prep Kit (NEB E7645S/L, New England BioLabs  
503 ® Inc.), and quantification and quality control of generated libraries were performed on an Agilent 2100  
504 Bioanalyzer (Agilent Technologies, Santa Clara, CA). The libraries were then sequenced with TruSeq SBS  
505 Kit v4-HS reagents on an Illumina HiSeq 2500 platform (Illumina, San Diego, CA). For PacBio sequencing,  
506 DNA was sheared to ~15-20 kb using a Megarupter (Diagenode) and sequenced on a PacBio RS II system  
507 (Pacific Biosciences, Menlo Park, CA).

508 High-quality PacBio sub-reads were assembled by aligning the Illumina paired-end 150 bp reads with the  
509 Basic Local Alignment via Successive Refinement (BLASR) aligner, a tool that combines data from short  
510 read alignments with optimization methods from whole genome alignment (Chaisson and Tesler, 2012),  
511 and were trimmed using bbdduk, aligned with bbmap, and the resulting sorted bam files and the Pacbio  
512 consensus reference were used as input to pilon (--genome genome.fasta, --bam input.bam) (Walker et al.,  
513 2014) for further error correction and polishing. The assemblies were further polished with arrow in Canu  
514 1.7 with parameter corOutCoverage=60 (Koren et al., 2017). The largest circular contig in each assembly  
515 represented the chromosome size for each bacterium. In addition, plasmid contigs were BLASTed against  
516 closely related genomes to confirm these were indeed plasmids. For *S. pseudonitzschia* F5, we were not  
517 able to close the chromosome due to high number of repeats in the genome and thus exact chromosome  
518 size could not be determined (Table 1). The consensus reference was annotated by Prokka (Seemann, 2014)  
519 and RAST, and checked for completeness by BUSCO (Simão et al., 2015). Circa 1.2.1  
520 (<http://omgenomics.com/circa/>) was used to draw chromosomes circos plot and chord diagram to compare  
521 the same gene locations in different genomes. All genome sequences and their annotations can be accessed  
522 at GenBank under the accession numbers WKFG01000000 and CP046140-CP046144.

523 Mining publicly available *Alteromonas* genomes for autoinducer synthase gene was performed on  
524 MicroScope (<https://mage.genoscope.cns.fr/microscope/home/index.php>). Identification and classification  
525 of transporter proteins in the three bacterial genomes was done using 6,097 membrane transport protein  
526 sequences downloaded from the Transporter Classification Database (TCDB) (Saier Jr et al., 2016). To this  
527 end, Gblast2 program (<http://www.tcdb.org/labsoftware.php>) with a cutoff e-value  $< 1e^{-20}$  was used and  
528 sequences with alignment scores  $< 100$  were removed. The chemotaxis, flagellar protein, pili,  
529 exopolysaccharides and quorum sensing related gene identities were confirmed by BLASTp with the model  
530 *Roseobacter* group strain *Ruegueria pomeroyi* DSS-3.

### 531 **QS genes analysis**

532 The *luxR*-like and *luxI*-like genes of *S. pseudonitzschiae* F5 and *Phaeobacter* sp. F10 were predicted by  
533 RAST and Prokka. Maximum likelihood phylogenetic trees of multiple copies of LuxI-like, genetically  
534 linked LuxR-like and their internal transcribed spacer (ITS) sequences from *S. pseudonitzschiae* F5,  
535 *Phaeobacter* sp. F10, and 30 publicly accessible *Roseobacter* group genomes were constructed using  
536 PhyML 3.0 (Guindon et al., 2010) with HKY85 substitution model, which was selected according to SMS  
537 (Smart Model Selection in PhyML) (Lefort et al., 2017). These 30 strains were chosen based on several  
538 criteria: 1) Strains must have published information about at least two AHLs molecules, motility and  
539 attachment lifestyles, 2) All strains have whole genomes publicly available, and one of the following two  
540 criteria: 3) Strains are phylogenetically related to *S. pseudonitzschiae* F5 and *Phaeobacter* sp. F10, or 4)  
541 Strains are well studied as model roseobacters. The *luxRI* and ITS sequences of *Pseudomonas aeruginosa*  
542 PAO1 (RefSeq accession number NC\_002516.2) were used as an outgroup. Phylogeny was tested with a  
543 fast likelihood-based method aBayes (Anisimova et al., 2011) with 100 bootstraps.

### 544 **AHLs extraction and identification**



545 To extract AHL molecules, *S. pseudonitzschiae* F5 and *Phaeobacter* sp. F10 strains were re-plated from  
546 glycerol stocks and subsequently single picked colonies were inoculated overnight in 25-mL marine broth  
547 at 26°C in the dark and shaking at 180 rpm. Overnight cultures were subsequently transferred to 1 L sterile  
548 marine broth in triplicates and grown under the same conditions for 20 hours. Finally, bacterial cells were  
549 removed by centrifugation (15 min, 7000 rpm) when the optical density (600 nm) reached 1.0. To further  
550 remove residual bacteria, the supernatant was further filtered through 0.2- $\mu$ m polycarbonate membrane  
551 filters (Whatman, NJ, United States). Oasis HLB solid-phase extraction (SPE) cartridges (3 cc, 540 mg)  
552 were activated according to the manufacturer's instructions and were subsequently used to remove organic  
553 molecules from the filtrates as previously described (Wang et al., 2017). Finally, extracts were eluted with  
554 5 mL 0.1% (v/v) formic acid in methanol and dried using an evaporator (SpeedVac SC210A, Thermo  
555 Savant, Holbrook, NY, USA) and were stored at -20°C for subsequent UHPLC-MS/MS analysis. AHL  
556 standards (Supplementary Table S4) were acquired from Cayman Chemicals and Sigma-Aldrich in order  
557 to help identify AHLs from *S. pseudonitzschiae* F5 and *Phaeobacter* sp. F10.

558 AHLs were analyzed using an Agilent 1290 HPLC system coupled to a Bruker Impact II Q-ToF-MS  
559 (Bruker, Germany). Metabolites were separated using a reversed-phase separation method. In RP mode,  
560 medium-polarity and non-polar metabolites were separated using an Eclipse Plus C<sub>18</sub> column (50mm ×  
561 2.1mm ID) (Agilent, US). Chromatographic separation consisted of MilliQ-H<sub>2</sub>O + 0.2% formic acid (buffer  
562 A), and Acetonitrile + 0.2% formic acid (Buffer C) at a flowrate of 0.4 mL. The initial mobile phase  
563 composition was 90% A and 5% C followed by a gradient to 100% C over 18 min. The column was  
564 maintained at 100% C for 2 mins followed by cleaning with isopropanol for 3 min. The column was allowed  
565 to equilibrate for 4 min using the initial mobile phase composition. Detection was carried out in the positive  
566 ionization mode with the following parameters: Mass Range = 50 – 1300 m/z measured at 6 Hz, ESI source  
567 parameters: dry gas temperature = 220°C, dry gas flow = 10.0 l/min, Nebulizer pressure = 2.2 bar, Capillary  
568 V = 3000 V, end plate Offset: 500 V; MS-ToF tuning parameters: Funnel 1 RF = 150 Vpp, Funnel 2 RF =

569 200 Vpp, isCID Energy = 0 eV, Hexapole RF = 50 Vpp, Ion Energy = 4.0 eV, Low Mass = 90 m/z, Collision  
570 Energy = 7.0 eV, pre Pulse storage = 5  $\mu$ s.

571 Data was processed and analyzed with Metaboscape 3.0 (Bruker, Bremen). Processing was conducted with  
572 the T-Rex3D algorithm with an intensity threshold of 500 and a minimum peak length of 10 spectra. Spectra  
573 were lock-mass calibrated, and features were only created if detected in a minimum of 3 samples. The  
574 presence of a specific AHL was determined by comparing the high-resolution parent ion mass, daughter  
575 ion masses and retention times of the purchased standards relative to bacterial extracts.

### 576 **Bacterial motility and biofilm formation assays**

577 Bacterial motility assay was performed using semisolid (0.25% w/v) marine agar plates supplemented with  
578 a final concentration of 2  $\mu$ M of each AHL or QS inhibitor (QSI) as described previously (Zan et al., 2012).  
579 The QSIs 2(5H)-furanone and (Z)-4-Bromo-5-(bromomethylene)-2(5H)-furanone (furanone C-30) were  
580 purchased from Sigma-Aldrich. *S. pseudonitzschiae* F5, *Phaeobacter* sp. F10, and *A. macleodii* F12 strains  
581 were grown in marine broth overnight, and then were gently inoculated using a sterilized toothpick into the  
582 center of the agar surface. Triplicate plates were incubated at 26°C for 3 days after which motility plates  
583 were observed using the Uvitec Cambridge Fire-reader imaging system. The proportion of motile area  
584 (percent motility) was measured using ImageJ software (<http://rsb.info.nih.gov/ij/>). Bacterial motility is  
585 characterized by a circular swimming zone in the motility assay or by dendritic morphology, which is  
586 typical for swarming motility caused by a locally restricted movement on agar plates (Michael et al., 2016).

587 Bacterial biofilm formation was quantified for *S. pseudonitzschiae* F5, *Phaeobacter* sp. F10, and *A.*  
588 *macleodii* F12 strains using the crystal violet assay (O'toole and Kolter, 1998). Briefly, bacteria were  
589 cultured in marine broth overnight and then diluted to  $\sim 1 \times 10^5$  cells/mL. 100  $\mu$ L aliquots were transferred  
590 to a 96-well suspension culture plate (Greiner bio-one, CELLSTAR, Monroe, NC, USA). 10  $\mu$ g/mL AHL

591 or QSI were added to each well respectively in triplicates as final concentration, which is optimized from  
592 previous studies (Ren et al., 2001; Zhu et al., 2019) while controls received no AHL or QSI addition. The  
593 plate was incubated at 26°C for 24 h and subsequently 25  $\mu$ L of 0.1% crystal violet was added to each well  
594 and incubated at room temperature for 15 min. Wells were rinsed twice with 150  $\mu$ L Milli-Q water to  
595 remove free-living bacteria and then dried at 60°C for 10 min. Finally, stained biomass was solubilized in  
596 95% ethanol for 1 h and absorbance readings were measured using a plate reader (BioTek, Winooski, VT)  
597 at 600 nm. Unpaired t-test was used to compare the significant differences of control and other variables in  
598 bacterial swarming and biofilm formation.

599 **Acknowledgements**

600 We would like to thank the China Scholarship Council for the financial support of C.F. This research was  
601 partially carried out using the Core Technology Platforms resources at New York University Abu Dhabi.  
602 This work was funded by an NYU Abu Dhabi grant (AD179) to S.A.A.

603

604 **Conflict of interest**

605 The authors declare that they have no competing interests.

606

607 **References**

- 608 Abreu, P.C., Rörig, L.R., Garcia, V., Odebrecht, C., and Biddanda, B. (2003) Decoupling between bacteria  
609 and the surf-zone diatom *Asterionellopsis glacialis* at Cassino Beach, Brazil. *Aquatic microbial ecology* **32**:  
610 219-228.
- 611 Amato, A., Sabatino, V., Nylund, G.M., Bergkvist, J., Basu, S., Andersson, M.X. et al. (2018) Grazer-induced  
612 transcriptomic and metabolomic response of the chain-forming diatom *Skeletonema marinoi*. *The ISME*  
613 *journal* **12**: 1594-1604.
- 614 Amin, S., Hmelo, L., Van Tol, H., Durham, B., Carlson, L., Heal, K. et al. (2015) Interaction and signalling  
615 between a cosmopolitan phytoplankton and associated bacteria. *Nature* **522**: 98-101.
- 616 Amin, S.A., Parker, M.S., and Armbrust, E.V. (2012) Interactions between diatoms and bacteria. *Microbiol*  
617 *Mol Biol Rev* **76**: 667-684.
- 618 Anisimova, M., Gil, M., Dufayard, J.-F., Dessimoz, C., and Gascuel, O. (2011) Survey of branch support  
619 methods demonstrates accuracy, power, and robustness of fast likelihood-based approximation schemes.  
620 *Systematic biology* **60**: 685-699.
- 621 Antunes, L.C.M., Ferreira, R.B., Buckner, M.M., and Finlay, B.B. (2010) Quorum sensing in bacterial  
622 virulence. *Microbiology* **156**: 2271-2282.
- 623 Bagatini, I.L., Eiler, A., Bertilsson, S., Klaveness, D., Tessarolli, L.P., and Vieira, A.A.H. (2014) Host-specificity  
624 and dynamics in bacterial communities associated with bloom-forming freshwater phytoplankton. *PLoS*  
625 *One* **9**.
- 626 Bar-Zeev, E., Berman-Frank, I., Girshevitz, O., and Berman, T. (2012) Revised paradigm of aquatic biofilm  
627 formation facilitated by microgel transparent exopolymer particles. *Proceedings of the National Academy*  
628 *of Sciences* **109**: 9119-9124.
- 629 Bardy, S.L., Ng, S.Y., and Jarrell, K.F. (2003) Prokaryotic motility structures. *Microbiology* **149**: 295-304.
- 630 Bartling, P., Vollmers, J., and Petersen, J. (2018) The first world swimming championships of roseobacters-  
631 Phylogenomic insights into an exceptional motility phenotype. *Syst Appl Microbiol* **41**: 544-554.
- 632 Bassler, B.L. (2002) Small talk: cell-to-cell communication in bacteria. *Cell* **109**: 421-424.
- 633 Behringer, G., Ochsenkühn, M.A., Fei, C., Fanning, J., Koester, J.A., and Amin, S.A. (2018) Bacterial  
634 communities of diatoms display strong conservation across strains and time. *Frontiers in microbiology* **9**:  
635 659.
- 636 Bell, W., and Mitchell, R. (1972) Chemotactic and growth responses of marine bacteria to algal  
637 extracellular products. *The Biological Bulletin* **143**: 265-277.
- 638 Bertrand, E.M., McCrow, J.P., Moustafa, A., Zheng, H., McQuaid, J.B., Delmont, T.O. et al. (2015)  
639 Phytoplankton–bacterial interactions mediate micronutrient colimitation at the coastal Antarctic sea ice  
640 edge. *Proceedings of the National Academy of Sciences* **112**: 9938-9943.
- 641 Bidle, K.D., and Azam, F. (2001) Bacterial control of silicon regeneration from diatom detritus: significance  
642 of bacterial ectohydrolases and species identity. *Limnology and Oceanography* **46**: 1606-1623.
- 643 Blackburn, N., Fenchel, T., and Mitchell, J. (1998) Microscale nutrient patches in planktonic habitats shown  
644 by chemotactic bacteria. *Science* **282**: 2254-2256.

- 645 Bramucci, A.R., Labeeuw, L., Orata, F.D., Ryan, E.M., Malmstrom, R.R., and Case, R.J. (2018) The bacterial  
646 symbiont *Phaeobacter inhibens* shapes the life history of its algal host *Emiliania huxleyi*. *Frontiers in*  
647 *Marine Science* **5**: 188.
- 648 Brand, L.E., Guillard, R.R., and Murphy, L.S. (1981) A method for the rapid and precise determination of  
649 acclimated phytoplankton reproduction rates. *Journal of plankton research* **3**: 193-201.
- 650 Bruhn, J.B., Gram, L., and Belas, R. (2007) Production of antibacterial compounds and biofilm formation  
651 by *Roseobacter* species are influenced by culture conditions. *Appl Environ Microbiol* **73**: 442-450.
- 652 Buchan, A., LeClerc, G.R., Gulvik, C.A., and González, J.M. (2014) Master recyclers: features and functions  
653 of bacteria associated with phytoplankton blooms. *Nature Reviews Microbiology* **12**: 686-698.
- 654 Buchan, A., Mitchell, A., Cude, W.N., and Campagna, S. (2016) Acyl-homoserine lactone-based quorum  
655 sensing in members of the marine bacterial *Roseobacter* clade: complex cell-to-cell communication  
656 controls multiple physiologies. *Stress and Environmental Regulation of Gene Expression and Adaptation*  
657 *in Bacteria*: 225-233.
- 658 Burkhardt, B.G., Watkins-Brandt, K.S., Defforey, D., Paytan, A., and White, A.E. (2014) Remineralization of  
659 phytoplankton-derived organic matter by natural populations of heterotrophic bacteria. *Marine*  
660 *Chemistry* **163**: 1-9.
- 661 Camacho, C., Coulouris, G., Avagyan, V., Ma, N., Papadopoulos, J., Bealer, K., and Madden, T.L. (2009)  
662 BLAST+: architecture and applications. *BMC bioinformatics* **10**: 421.
- 663 Carvalho, C.C. (2018) Marine biofilms: a successful microbial strategy with economic implications.  
664 *Frontiers in Marine Science* **5**: 126.
- 665 Case, R.J., Labbate, M., and Kjelleberg, S. (2008) AHL-driven quorum-sensing circuits: their frequency and  
666 function among the Proteobacteria. *The ISME Journal* **2**: 345.
- 667 Chaisson, M.J., and Tesler, G. (2012) Mapping single molecule sequencing reads using basic local  
668 alignment with successive refinement (BLASR): application and theory. *BMC bioinformatics* **13**: 238.
- 669 Chi, W., Zheng, L., He, C., Han, B., Zheng, M., Gao, W. et al. (2017) Quorum sensing of microalgae  
670 associated marine *Ponticoccus* sp. PD-2 and its algicidal function regulation. *AMB Express* **7**: 1-10.
- 671 Churchill, M.E., and Chen, L. (2011) Structural basis of acyl-homoserine lactone-dependent signaling.  
672 *Chemical reviews* **111**: 68-85.
- 673 Cude, W.N., and Buchan, A. (2013) Acyl-homoserine lactone-based quorum sensing in the *Roseobacter*  
674 clade: complex cell-to-cell communication controls multiple physiologies. *Front Microbiol* **4**: 336.
- 675 Cude, W.N., Prevatte, C.W., Hadden, M.K., May, A.L., Smith, R.T., Swain, C.L. et al. (2015) *Phaeobacter* sp.  
676 strain Y4I utilizes two separate cell-to-cell communication systems to regulate production of the  
677 antimicrobial indigoidine. *Appl Environ Microbiol* **81**: 1417-1425.
- 678 Dang, H., Li, T., Chen, M., and Huang, G. (2008) Cross-ocean distribution of *Rhodobacterales* bacteria as  
679 primary surface colonizers in temperate coastal marine waters. *Appl Environ Microbiol* **74**: 52-60.
- 680 Daniels, R., Vanderleyden, J., and Michiels, J. (2004) Quorum sensing and swarming migration in bacteria.  
681 *FEMS Microbiology Reviews* **28**: 261-289.
- 682 Diner, R.E., Schwenck, S.M., McCrow, J.P., Zheng, H., and Allen, A.E. (2016) Genetic manipulation of  
683 competition for nitrate between heterotrophic bacteria and diatoms. *Frontiers in microbiology* **7**: 880.

- 684 Durham, B.P., Sharma, S., Luo, H., Smith, C.B., Amin, S.A., Bender, S.J. et al. (2015) Cryptic carbon and  
685 sulfur cycling between surface ocean plankton. *Proceedings of the National Academy of Sciences* **112**: 453-  
686 457.
- 687 Durham, B.P., Boysen, A.K., Carlson, L.T., Groussman, R.D., Heal, K.R., Cain, K.R. et al. (2019) Sulfonate-  
688 based networks between eukaryotic phytoplankton and heterotrophic bacteria in the surface ocean.  
689 *Nature microbiology* **4**: 1706-1715.
- 690 Field, C.B., Behrenfeld, M.J., Randerson, J.T., and Falkowski, P. (1998) Primary production of the biosphere:  
691 integrating terrestrial and oceanic components. *science* **281**: 237-240.
- 692 Franco, A.d.O.d.R., They, N.H., Canani, L.G.d.C., Maggioni, R., and Odebrecht, C. (2016) *Asterionellopsis*  
693 *tropicalis* (Bacillariophyceae): a new tropical species found in diatom accumulations. *Journal of phycology*  
694 **52**: 888-895.
- 695 Gardiner, M., Fernandes, N.D., Nowakowski, D., Raftery, M., Kjelleberg, S., Zhong, L. et al. (2015) VarR  
696 controls colonization and virulence in the marine macroalgal pathogen *Nautella italica* R11. *Frontiers in*  
697 *microbiology* **6**: 1130.
- 698 Gascuel, O. (1997) BIONJ: an improved version of the NJ algorithm based on a simple model of sequence  
699 data. *Molecular biology and evolution* **14**: 685-695.
- 700 Geng, H., and Belas, R. (2010) Molecular mechanisms underlying *Roseobacter*–phytoplankton symbioses.  
701 *Current opinion in biotechnology* **21**: 332-338.
- 702 Gram, L., Grossart, H.-P., Schlingloff, A., and Kjørboe, T. (2002) Possible quorum sensing in marine snow  
703 bacteria: production of acylated homoserine lactones by *Roseobacter* strains isolated from marine snow.  
704 *Appl Environ Microbiol* **68**: 4111-4116.
- 705 Guillard, R.R. (1975) Culture of phytoplankton for feeding marine invertebrates. In *Culture of marine*  
706 *invertebrate animals*: Springer, pp. 29-60.
- 707 Guindon, S., Dufayard, J.-F., Lefort, V., Anisimova, M., Hordijk, W., and Gascuel, O. (2010) New algorithms  
708 and methods to estimate maximum-likelihood phylogenies: assessing the performance of PhyML 3.0.  
709 *Systematic biology* **59**: 307-321.
- 710 Hammer, B.K., and Bassler, B.L. (2003) Quorum sensing controls biofilm formation in *Vibrio cholerae*.  
711 *Molecular microbiology* **50**: 101-104.
- 712 Hansen, H., Purohit, A.A., Leiros, H.-K.S., Johansen, J.A., Kellermann, S.J., Bjelland, A.M., and Willassen,  
713 N.P. (2015) The autoinducer synthases LuxI and AinS are responsible for temperature-dependent AHL  
714 production in the fish pathogen *Aliivibrio salmonicida*. *BMC microbiology* **15**: 69.
- 715 He, Z., Wang, Q., Hu, Y., Liang, J., Jiang, Y., Ma, R. et al. (2012) Use of the quorum sensing inhibitor  
716 furanone C-30 to interfere with biofilm formation by *Streptococcus mutans* and its *luxS* mutant strain.  
717 *International journal of antimicrobial agents* **40**: 30-35.
- 718 Hmelo, L.R., Mincer, T.J., and Van Mooy, B.A. (2011) Possible influence of bacterial quorum sensing on the  
719 hydrolysis of sinking particulate organic carbon in marine environments. *Environmental microbiology*  
720 *reports* **3**: 682-688.
- 721 Hofmann, M., and Brian, D. (1991) Sequencing PCR DNA amplified directly from a bacterial colony.  
722 *Biotechniques* **11**: 30-31.

- 723 Hong, Z., Lai, Q., Luo, Q., Jiang, S., Zhu, R., Liang, J., and Gao, Y. (2015) *Sulfitobacter pseudonitzschiae* sp.  
724 nov., isolated from the toxic marine diatom *Pseudo-nitzschia multiseriata*. *International journal of*  
725 *systematic and evolutionary microbiology* **65**: 95-100.
- 726 Hou, H., Zhu, Y., Wang, Y., Zhang, G., and Hao, H. (2019) AHLs regulate biofilm formation and swimming  
727 motility of *Hafnia alvei* H4. *Frontiers in microbiology* **10**: 1330.
- 728 Huang, J.J., Han, J.-I., Zhang, L.-H., and Leadbetter, J.R. (2003) Utilization of acyl-homoserine lactone  
729 quorum signals for growth by a soil pseudomonad and *Pseudomonas aeruginosa* PAO1. *Appl Environ*  
730 *Microbiol* **69**: 5941-5949.
- 731 Hudaiberdiev, S., Choudhary, K.S., Vera Alvarez, R., Gelencsér, Z., Ligeti, B., Lamba, D., and Pongor, S. (2015)  
732 Census of solo LuxR genes in prokaryotic genomes. *Frontiers in cellular and infection microbiology* **5**: 20.
- 733 Janssens, J.C., Metzger, K., Daniels, R., Ptacek, D., Verhoeven, T., Habel, L.W. et al. (2007) Synthesis of N-  
734 acyl homoserine lactone analogues reveals strong activators of SdiA, the *Salmonella enterica* serovar  
735 Typhimurium LuxR homologue. *Applied and environmental microbiology* **73**: 535-544.
- 736 Jefferson, K.K. (2004) What drives bacteria to produce a biofilm? *FEMS microbiology letters* **236**: 163-173.
- 737 Kaczmarek, I., Mather, L., Luddington, I.A., Muise, F., and Ehrman, J.M. (2014) Cryptic diversity in a  
738 cosmopolitan diatom known as *Asterionellopsis glacialis* (Fragilariaceae): Implications for ecology,  
739 biogeography, and taxonomy. *American Journal of Botany* **101**: 267-286.
- 740 Karentz, D., and Smayda, T.J. (1984) Temperature and seasonal occurrence patterns of 30 dominant  
741 phytoplankton species in Narragansett Bay over a 22-year period (1959–1980). *Mar Ecol Prog Ser* **18**: 277-  
742 293.
- 743 Kazamia, E., Czesnick, H., Nguyen, T.T.V., Croft, M.T., Sherwood, E., Sasso, S. et al. (2012) Mutualistic  
744 interactions between vitamin B12 - dependent algae and heterotrophic bacteria exhibit regulation.  
745 *Environmental microbiology* **14**: 1466-1476.
- 746 Kim, J.H., Park, J.H., Song, Y.H., and Chang, D.S. (1999) Isolation and characterization of the marine  
747 bacterium, *Alteromonas* sp. SR-14 inhibiting the growth of diatom, *Chaetoceros* species. *Korean Journal*  
748 *of Fisheries and Aquatic Sciences* **32**: 155-159.
- 749 Koch, H., Dürwald, A., Schweder, T., Noriega-Ortega, B., Vidal-Melgosa, S., Hehemann, J.-H. et al. (2019)  
750 Biphasic cellular adaptations and ecological implications of *Alteromonas macleodii* degrading a mixture of  
751 algal polysaccharides. *The ISME journal* **13**: 92-103.
- 752 Kogure, K., Simidu, U., and Taga, N. (1981) Bacterial attachment to phytoplankton in sea water. *Journal of*  
753 *Experimental Marine Biology and Ecology* **56**: 197-204.
- 754 Koren, S., Walenz, B.P., Berlin, K., Miller, J.R., Bergman, N.H., and Phillippy, A.M. (2017) Canu: scalable and  
755 accurate long-read assembly via adaptive k-mer weighting and repeat separation. *Genome research* **27**:  
756 722-736.
- 757 Korner, H. (1970) Morphologie und Taxonomie der Diatomeen-gattung *Asterionella*. *Nova Hedwigia* **20**:  
758 557-724.
- 759 Labeeuw, L., Khey, J., Bramucci, A.R., Atwal, H., de la Mata, A.P., Harynuk, J., and Case, R.J. (2016) Indole-  
760 3-acetic acid is produced by *Emiliania huxleyi* coccolith-bearing cells and triggers a physiological response  
761 in bald cells. *Frontiers in microbiology* **7**: 828.
- 762 Lefort, V., Longueville, J.-E., and Gascuel, O. (2017) SMS: smart model selection in PhyML. *Molecular*  
763 *biology and evolution* **34**: 2422-2424.



- 764 Lewis, K. (2001) Riddle of biofilm resistance. *Antimicrobial agents and chemotherapy* **45**: 999-1007.
- 765 Long, R.A., and Azam, F. (1996) Abundant protein-containing particles in the sea. *Aquatic Microbial*  
766 *Ecology* **10**: 213-221.
- 767 López-Pérez, M., Gonzaga, A., Martin-Cuadrado, A.-B., Onyshchenko, O., Ghavidel, A., Ghai, R., and  
768 Rodríguez-Valera, F. (2012) Genomes of surface isolates of *Alteromonas macleodii*: the life of a  
769 widespread marine opportunistic copiotroph. *Scientific reports* **2**: 696.
- 770 Lunau, M., Lemke, A., Walther, K., Martens-Habbena, W., and Simon, M. (2005) An improved method for  
771 counting bacteria from sediments and turbid environments by epifluorescence microscopy.  
772 *Environmental Microbiology* **7**: 961-968.
- 773 Majzoub, M.E., Beyersmann, P.G., Simon, M., Thomas, T., Brinkhoff, T., and Egan, S. (2019) *Phaeobacter*  
774 *inhibens* controls bacterial community assembly on a marine diatom. *FEMS microbiology ecology* **95**:  
775 fiz060.
- 776 Malviya, S., Scalco, E., Audic, S., Vincent, F., Veluchamy, A., Poulain, J. et al. (2016) Insights into global  
777 diatom distribution and diversity in the world's ocean. *Proceedings of the National Academy of Sciences*  
778 **113**: E1516-E1525.
- 779 Mayali, X., and Doucette, G.J. (2002) Microbial community interactions and population dynamics of an  
780 algicidal bacterium active against *Karenia brevis* (Dinophyceae). *Harmful algae* **1**: 277-293.
- 781 Mayali, X., and Azam, F. (2004) Algicidal bacteria in the sea and their impact on algal blooms 1. *Journal of*  
782 *Eukaryotic Microbiology* **51**: 139-144.
- 783 Mayali, X., Franks, P.J., and Burton, R.S. (2011) Temporal attachment dynamics by distinct bacterial taxa  
784 during a dinoflagellate bloom. *Aquatic microbial ecology* **63**: 111-122.
- 785 Michael, V., Frank, O., Bartling, P., Scheuner, C., Goker, M., Brinkmann, H., and Petersen, J. (2016) Biofilm  
786 plasmids with a rhamnase operon are widely distributed determinants of the 'swim-or-stick' lifestyle in  
787 roseobacters. *ISME J* **10**: 2498-2513.
- 788 Miller, T.R., and Belas, R. (2004) Dimethylsulfoniopropionate metabolism by *Pfiesteria*-associated  
789 *Roseobacter* spp. *Appl Environ Microbiol* **70**: 3383-3391.
- 790 Miller, T.R., and Belas, R. (2006) Motility is involved in *Silicibacter* sp. TM1040 interaction with  
791 dinoflagellates. *Environmental microbiology* **8**: 1648-1659.
- 792 Miller, T.R., Hnilicka, K., Dziedzic, A., Desplats, P., and Belas, R. (2004) Chemotaxis of *Silicibacter* sp. strain  
793 TM1040 toward dinoflagellate products. *Appl Environ Microbiol* **70**: 4692-4701.
- 794 Mishra, N.K., Chang, J., and Zhao, P.X. (2014) Prediction of membrane transport proteins and their  
795 substrate specificities using primary sequence information. *PLoS One* **9**.
- 796 O'toole, G.A., and Kolter, R. (1998) Initiation of biofilm formation in *Pseudomonas fluorescens* WCS365  
797 proceeds via multiple, convergent signalling pathways: a genetic analysis. *Molecular microbiology* **28**: 449-  
798 461.
- 799 Ortori, C.A., Atkinson, S., Chhabra, S.R., Cámara, M., Williams, P., and Barrett, D.A. (2007) Comprehensive  
800 profiling of N-acylhomoserine lactones produced by *Yersinia pseudotuberculosis* using liquid  
801 chromatography coupled to hybrid quadrupole-linear ion trap mass spectrometry. *Analytical and*  
802 *bioanalytical chemistry* **387**: 497-511.

- 803 Overhage, J., Lewenza, S., Marr, A.K., and Hancock, R.E. (2007) Identification of genes involved in  
804 swarming motility using a *Pseudomonas aeruginosa* PAO1 mini-Tn5-lux mutant library. *Journal of*  
805 *bacteriology* **189**: 2164-2169.
- 806 Pomeroy, L.R. (1974) The ocean's food web, a changing paradigm. *Bioscience* **24**: 499-504.
- 807 Ponnusamy, K., Paul, D., Kim, Y.S., and Kweon, J.H. (2010) 2 (5H)-Furanone: a prospective strategy for  
808 biofouling-control in membrane biofilm bacteria by quorum sensing inhibition. *Brazilian Journal of*  
809 *Microbiology* **41**: 227-234.
- 810 Raina, J.-B., Fernandez, V., Lambert, B., Stocker, R., and Seymour, J.R. (2019) The role of microbial motility  
811 and chemotaxis in symbiosis. *Nature Reviews Microbiology* **17**: 284-294.
- 812 Rambaut, A. (2014) FigTree 1.4. 2 software. *Institute of Evolutionary Biology, Univ Edinburgh*.
- 813 Ramos, J.B., Schulz, K.G., Brownlee, C., Sett, S., and Azevedo, E.B. (2014) Effects of increasing seawater  
814 carbon dioxide concentrations on chain formation of the diatom *Asterionellopsis glacialis*. *PloS one* **9**:  
815 e90749.
- 816 Rao, D., Webb, J.S., and Kjelleberg, S. (2006) Microbial colonization and competition on the marine alga  
817 *Ulva australis*. *Appl Environ Microbiol* **72**: 5547-5555.
- 818 Rasmussen, T.B., Manefield, M., Andersen, J.B., Eberl, L., Anthoni, U., Christophersen, C. et al. (2000) How  
819 *Delisea pulchra* furanones affect quorum sensing and swarming motility in *Serratia liquefaciens* MG1.  
820 *Microbiology* **146**: 3237-3244.
- 821 Ren, D., Sims, J.J., and Wood, T.K. (2001) Inhibition of biofilm formation and swarming of *Escherichia coli*  
822 by (5Z)-4-bromo-5-(bromomethylene)-3-butyl-2 (5H)-furanone. *Environmental Microbiology* **3**: 731-  
823 736.
- 824 Rodrigo-Torres, L., Pujalte, M.J., and Arahal, D.R. (2016) Draft genome of *Leisingera aquaemixtae* CECT  
825 8399T, a member of the *Roseobacter* clade isolated from a junction of fresh and ocean water in Jeju Island,  
826 South Korea. *Genomics data* **7**: 233-236.
- 827 Saier Jr, M.H., Reddy, V.S., Tsu, B.V., Ahmed, M.S., Li, C., and Moreno-Hagelsieb, G. (2016) The transporter  
828 classification database (TCDB): recent advances. *Nucleic acids research* **44**: D372-D379.
- 829 Samo, T.J., Kimbrel, J.A., Nilson, D.J., Pett - Ridge, J., Weber, P.K., and Mayali, X. (2018) Attachment  
830 between heterotrophic bacteria and microalgae influences symbiotic microscale interactions.  
831 *Environmental microbiology* **20**: 4385-4400.
- 832 Seemann, T. (2014) Prokka: rapid prokaryotic genome annotation. *Bioinformatics* **30**: 2068-2069.
- 833 Segev, E., Wyche, T.P., Kim, K.H., Petersen, J., Ellebrandt, C., Vlamakis, H. et al. (2016) Dynamic metabolic  
834 exchange governs a marine algal-bacterial interaction. *Elife* **5**: e17473.
- 835 Seyedsayamdost, M.R., Carr, G., Kolter, R., and Clardy, J. (2011) Roseobacticides: small molecule  
836 modulators of an algal-bacterial symbiosis. *Journal of the American Chemical Society* **133**: 18343-18349.
- 837 Seymour, J.R., Amin, S.A., Raina, J.-B., and Stocker, R. (2017) Zooming in on the phycosphere: the  
838 ecological interface for phytoplankton-bacteria relationships. *Nature microbiology* **2**: 17065.
- 839 Shibl, A.A., Isaac, A., Ochsenkühn, M.A., Cardenas, A., Fei, C., Behringer, G. et al. (2020) Diatom modulation  
840 of microbial consortia through use of two unique secondary metabolites.  
841 (<https://doi.org/10.1101/2020.06.11.144840>).

- 842 Simão, F.A., Waterhouse, R.M., Ioannidis, P., Kriventseva, E.V., and Zdobnov, E.M. (2015) BUSCO:  
843 assessing genome assembly and annotation completeness with single-copy orthologs. *Bioinformatics* **31**:  
844 3210-3212.
- 845 Simon, N., Cras, A.-L., Foulon, E., and Lemée, R. (2009) Diversity and evolution of marine phytoplankton.  
846 *Comptes rendus biologies* **332**: 159-170.
- 847 Slightom, R.N., and Buchan, A. (2009) Surface colonization by marine roseobacters: integrating genotype  
848 and phenotype. *Appl Environ Microbiol* **75**: 6027-6037.
- 849 Smriga, S., Fernandez, V.I., Mitchell, J.G., and Stocker, R. (2016) Chemotaxis toward phytoplankton drives  
850 organic matter partitioning among marine bacteria. *Proceedings of the National Academy of Sciences* **113**:  
851 1576-1581.
- 852 Spaepen, S., and Vanderleyden, J. (2011) Auxin and plant-microbe interactions. *Cold Spring Harbor*  
853 *perspectives in biology* **3**: a001438.
- 854 Spaepen, S., Vanderleyden, J., and Remans, R. (2007) Indole-3-acetic acid in microbial and microorganism-  
855 plant signaling. *FEMS microbiology reviews* **31**: 425-448.
- 856 Stocker, R. (2012) Marine microbes see a sea of gradients. *science* **338**: 628-633.
- 857 Su, Y., Tang, K., Liu, J., Wang, Y., Zheng, Y., and Zhang, X.-H. (2018) Quorum sensing system of *Ruegeria*  
858 *mobilis* Rm01 controls lipase and biofilm formation. *Frontiers in microbiology* **9**: 3304.
- 859 Subramoni, S., and Venturi, V. (2009) LuxR-family 'solos': bachelor sensors/regulators of signalling  
860 molecules. *Microbiology* **155**: 1377-1385.
- 861 Teeling, H., Fuchs, B.M., Becher, D., Klockow, C., Gardebrecht, A., Benke, C.M. et al. (2012) Substrate-  
862 controlled succession of marine bacterioplankton populations induced by a phytoplankton bloom. *Science*  
863 **336**: 608-611.
- 864 Thole, S., Kalhoefer, D., Voget, S., Berger, M., Engelhardt, T., Liesegang, H. et al. (2012) *Phaeobacter*  
865 *gallaeciensis* genomes from globally opposite locations reveal high similarity of adaptation to surface life.  
866 *The ISME journal* **6**: 2229.
- 867 Thornton, D.C. (2014) Dissolved organic matter (DOM) release by phytoplankton in the contemporary and  
868 future ocean. *European Journal of Phycology* **49**: 20-46.
- 869 Töpel, M., Pinder, M.I., Johansson, O.N., Kourtchenko, O., Clarke, A.K., and Godhe, A. (2019) Complete  
870 genome sequence of novel *Sulfitobacter pseudonitzschiae* Strain SMR1, isolated from a culture of the  
871 marine diatom *Skeletonema marinoi*. *Journal of genomics* **7**: 7.
- 872 Van Mooy, B.A., Hmelo, L.R., Sofen, L.E., Campagna, S.R., May, A.L., Dyhrman, S.T. et al. (2012) Quorum  
873 sensing control of phosphorus acquisition in *Trichodesmium consortia*. *The ISME journal* **6**: 422-429.
- 874 Wagner-Döbler, I., and Biebl, H. (2006) Environmental biology of the marine *Roseobacter* lineage. *Annu*  
875 *Rev Microbiol* **60**: 255-280.
- 876 Walker, B.J., Abeel, T., Shea, T., Priest, M., Abouelliel, A., Sakthikumar, S. et al. (2014) Pilon: an integrated  
877 tool for comprehensive microbial variant detection and genome assembly improvement. *PloS one* **9**:  
878 e112963.
- 879 Wang, B., Tan, T., and Shao, Z. (2009) *Roseovarius pacificus* sp. nov., isolated from deep-sea sediment.  
880 *International journal of systematic and evolutionary microbiology* **59**: 1116-1121.

- 881 Wang, J., Ding, L., Li, K., Schmieder, W., Geng, J., Xu, K. et al. (2017) Development of an extraction method  
882 and LC–MS analysis for N-acylated-L-homoserine lactones (AHLs) in wastewater treatment biofilms.  
883 *Journal of Chromatography B* **1041**: 37-44.
- 884 Waters, C.M., and Bassler, B.L. (2005) Quorum sensing: cell-to-cell communication in bacteria. *Annu Rev*  
885 *Cell Dev Biol* **21**: 319-346.
- 886 Windler, M., Bova, D., Kryvenda, A., Straile, D., Gruber, A., and Kroth, P.G. (2014) Influence of bacteria on  
887 cell size development and morphology of cultivated diatoms. *Phycological Research* **62**: 269-281.
- 888 Wood, A.M., Everroad, R., and Wingard, L. (2005) Measuring growth rates in microalgal cultures. *Algal*  
889 *culturing techniques* **18**: 269-288.
- 890 Wuichet, K., Alexander, R.P., and Zhulin, I.B. (2007) Comparative genomic and protein sequence analyses  
891 of a complex system controlling bacterial chemotaxis. In *Methods in enzymology*: Elsevier, pp. 3-31.
- 892 Yao, Y., Martinez-Yamout, M.A., Dickerson, T.J., Brogan, A.P., Wright, P.E., and Dyson, H.J. (2006) Structure  
893 of the *Escherichia coli* quorum sensing protein SdiA: activation of the folding switch by acyl homoserine  
894 lactones. *Journal of molecular biology* **355**: 262-273.
- 895 Yates, E.A., Philipp, B., Buckley, C., Atkinson, S., Chhabra, S.R., Sockett, R.E. et al. (2002) N-acylhomoserine  
896 lactones undergo lactonolysis in a pH-, temperature-, and acyl chain length-dependent manner during  
897 growth of *Yersinia pseudotuberculosis* and *Pseudomonas aeruginosa*. *Infection and immunity* **70**: 5635-  
898 5646.
- 899 Zan, J., Cicirelli, E.M., Mohamed, N.M., Sibhatu, H., Kroll, S., Choi, O. et al. (2012) A complex LuxR-LuxI type  
900 quorum sensing network in a roseobacterial marine sponge symbiont activates flagellar motility and  
901 inhibits biofilm formation. *Mol Microbiol* **85**: 916-933.
- 902 Zhu, Y.L., Hou, H.M., Zhang, G.L., Wang, Y.F., and Hao, H.S. (2019) AHLs regulate biofilm formation and  
903 swimming motility of *Hafnia alvei* H4. *Frontiers in Microbiology* **10**: 1330-1330.
- 904 Ziesche, L., Rinkel, J., Dickschat, J.S., and Schulz, S. (2018) Acyl-group specificity of AHL synthases involved  
905 in quorum-sensing in *Roseobacter* group bacteria. *Beilstein journal of organic chemistry* **14**: 1309-1316.
- 906 Ziesche, L., Bruns, H., Dogs, M., Wolter, L., Mann, F., Wagner–Döbler, I. et al. (2015) Homoserine lactones,  
907 methyl oligohydroxybutyrates, and other extracellular metabolites of macroalgae-associated bacteria of  
908 the *Roseobacter* Clade: Identification and functions. *ChemBioChem* **16**: 2094-2107.
- 909 ZoBell, C.E. (1941) Studies on marine bacteria. I. The cultural requirements of heterotrophic aerobes. *J*  
910 *Mar Res* **4**: 42-75.
- 911

912 **Table 1.** Bacterial genome statistics.

| Statistic            | <i>S. pseudonitzschiae</i> F5 | <i>Phaeobacter</i> sp. F10 | <i>Alteromonas macleodii</i> F12 |
|----------------------|-------------------------------|----------------------------|----------------------------------|
| Genome size (bp)     | 5,087,289                     | 4,008,202                  | 4,727,977                        |
| Number of contigs    | 17                            | 3                          | 5                                |
| Chromosome size (bp) | 3,764,450*                    | 3,783,964                  | 3,117,849                        |
| CDs                  | 4,991                         | 3,878                      | 4,654                            |
| GC content (%)       | 61.8                          | 60.0                       | 44.9                             |
| N50 value            | 179,155                       | 153,588                    | 3,122,272                        |
| L50 value            | 3                             | 1                          | 1                                |

913 \**S. pseudonitzschiae* F5 chromosome size estimation was not possible due to high level of repeats in the  
914 genome. The size indicated is the size of the largest contig.

915 **Figure legends**

916 **Fig. 1.** Micrographs of *A. glacialis* strain A3 co-cultures with bacterial isolates. Diatom TEP were stained  
917 with alcian blue (**A, B, C**). Diatom and bacterial DNA was stained with SYBR Green I (**D, E, F**). Composite  
918 images show bacterial attachment mostly to TEP for *S. pseudonitzschiae* F5 and *Phaeobacter* sp. F10 but  
919 not *A. macleodii* F12 (**G, H, I**). Background in light micrographs show membrane filters.

920 **Fig. 2.** Chromosomal maps of bacterial isolate genomes showing distribution and localization of loci  
921 involved in attachment, motility, chemotaxis and quorum sensing. Tracks from the outermost to the center  
922 represent position on each chromosome, forward-strand protein-coding genes, reverse-strand protein  
923 coding genes, rRNA and tRNA genes, GC content and GC skew, respectively. Chromosomes of *S.*  
924 *pseudonitzschiae* F5, *Phaeobacter* sp. F10, and *A. macleodii* F12 are color-labeled with red, blue and green,  
925 respectively. (**A**) Homologs related to chemotaxis, motility and attachment. (**B**) Homologs related to  
926 quorum sensing. Black line refers to a *luxI* gene homolog unique to *S. pseudonitzschiae* F5.

927 **Fig. 3.** Identification of acyl-homoserine lactones (AHLs) from roseobacters isolates. Structures and  
928 UHPLC–MS/MS chromatograms of AHLs of *S. pseudonitzschiae* F5 or *Phaeobacter* sp. F10 isolated from  
929 pure cultural supernatants compared to purchased standards. For complete MS/MS spectra refer to  
930 Supplementary Fig. S5.

931 **Fig. 4.** AHLs control bacterial motility and attachment in *Roseobacter* group bacteria. (**A**) Motility assays  
932 of *S. pseudonitzschiae* F5, *Phaeobacter* sp. F10 and *A. macleodii* F12 with three AHL molecules: 3-oxo-  
933 C<sub>10</sub>-HSL, 3-oxo-C<sub>16</sub>-HSL and 3-oxo-C<sub>16:1</sub>-HSL, and two quorum sensing inhibitors (QSIs): 2(5H)-furanone  
934 and furanone C-30. Assays were conducted by inoculating 0.25% soft agar plates with each bacterium and  
935 incubating for three days. (**B**) Percent Motility of *S. pseudonitzschiae* F5, *Phaeobacter* sp. F10 and *A.*  
936 *macleodii* F12 in the presence of 2 μM AHLs or QSIs. (**C**) Biofilm quantification in the presence of 10

937  $\mu\text{g/mL}$  AHLs or QSIs. Assays were conducted by incubating  $1 \times 10^6$  bacterial cells with each molecule in  
938 96-well plates for 24 hours. Attachment was quantified using absorbance of solubilized crystal violet at 600  
939 nm. All error bars represent standard deviation (S.D.) of triplicate experiments. \*  $p < 0.05$ , \*\*  $p < 0.01$ , \*\*\*  
940  $p < 0.001$ ).

941 **Fig. 5.** Maximum-likelihood phylogenetic tree of 50 LuxR-ITS-LuxI loci and neighboring genes in 32  
942 roseobacterial genomes. Group B is highlighted by red branches at the top of the tree. Color shades indicate  
943 the different groups of luxR/I cassettes. Bacteria isolated in this study are bold-faced. Length shows the  
944 sequence length of LuxR-ITS-LuxI loci. D = dendritic motility, M = motility, A = attachment. Y and N  
945 indicate whether a bacterium is able or unable to carry out each function. Isolation origin of bacteria  
946 highlighted in red indicate a biological host origin. The number of AHL molecules reported from each  
947 bacterium is provided, if known. Note that information on which cassette makes which AHL molecule is  
948 scarce. Some bacteria are present twice in the tree because they possess more than one Lux-like operon.  
949 Gene neighborhood abbreviations: HK, histidine kinase; CHP, conserved hypothetical protein; TctA, TctA  
950 family transmembrane transporter; RND, RND multidrug efflux pump; AL, adenylosuccinate lyase; TF,  
951 trigger factor; Tran, transposase; TetR, TetR family transcriptional regulator; TR, transcriptional  
952 regulator. Bootstrap values  $> 50\%$  calculated from 1000 iterations are shown at branch nodes. \*Full  
953 references are listed in Supplementary Information.

### Alcian Blue

### SYBR Green

### Alcian Blue + SYBR Green

*A. glacialis* with  
*A. macleodii* F12

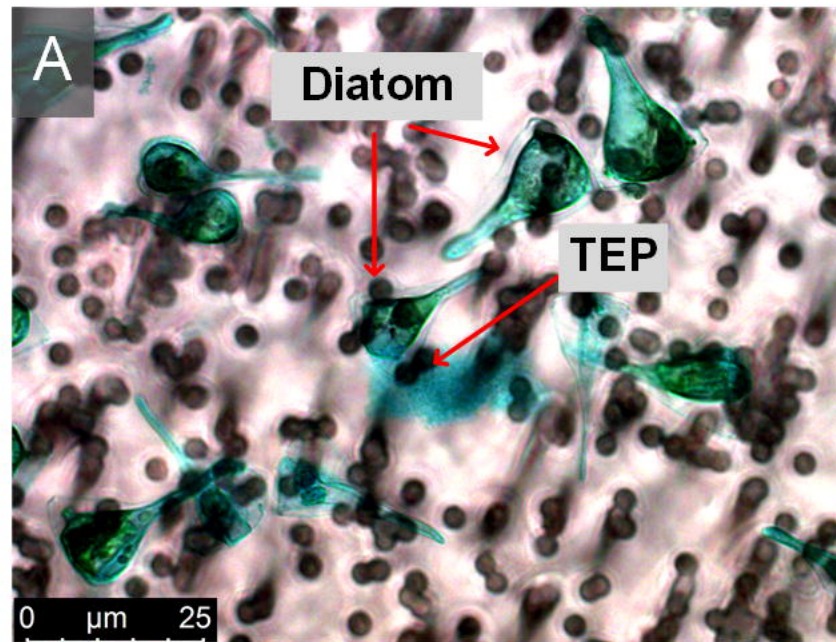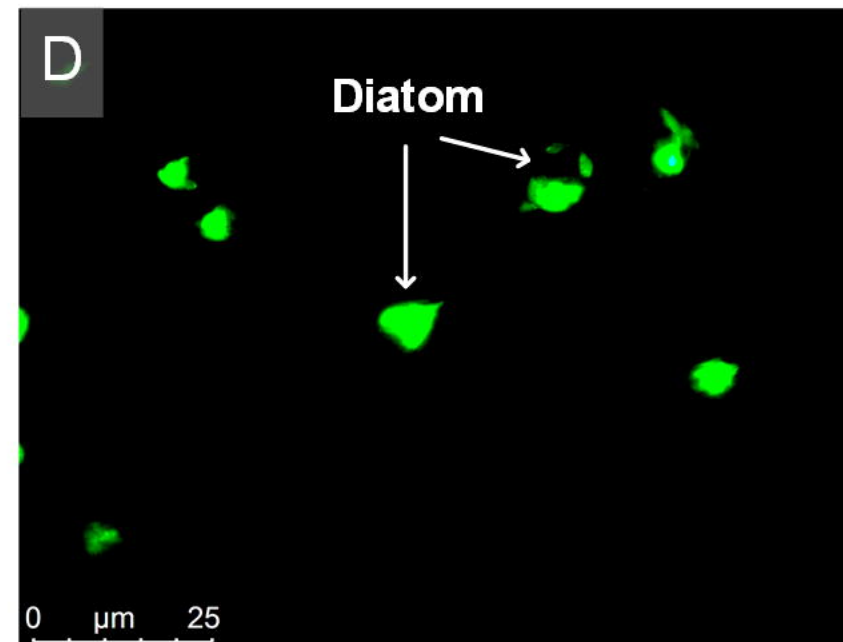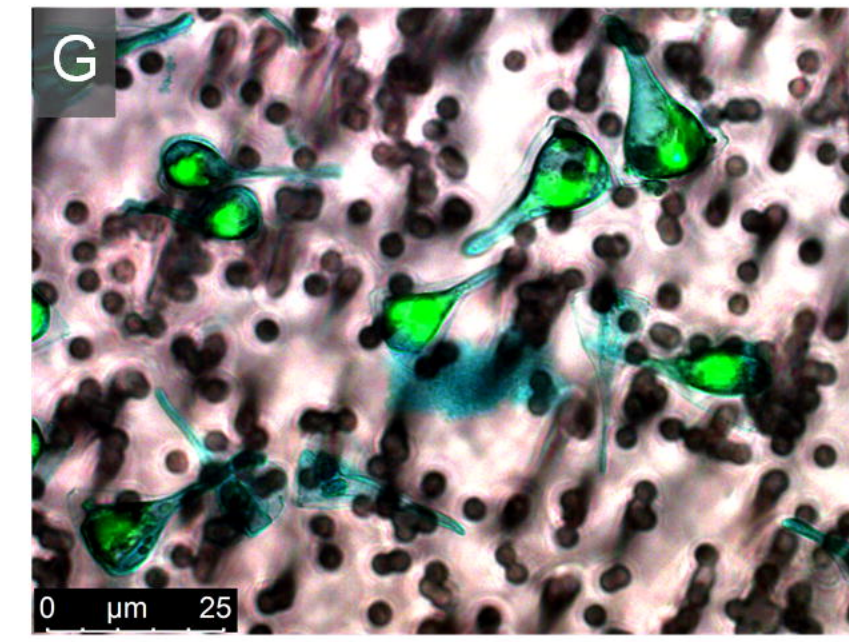

*A. glacialis* with  
*S. pseudonitzschiae* F5

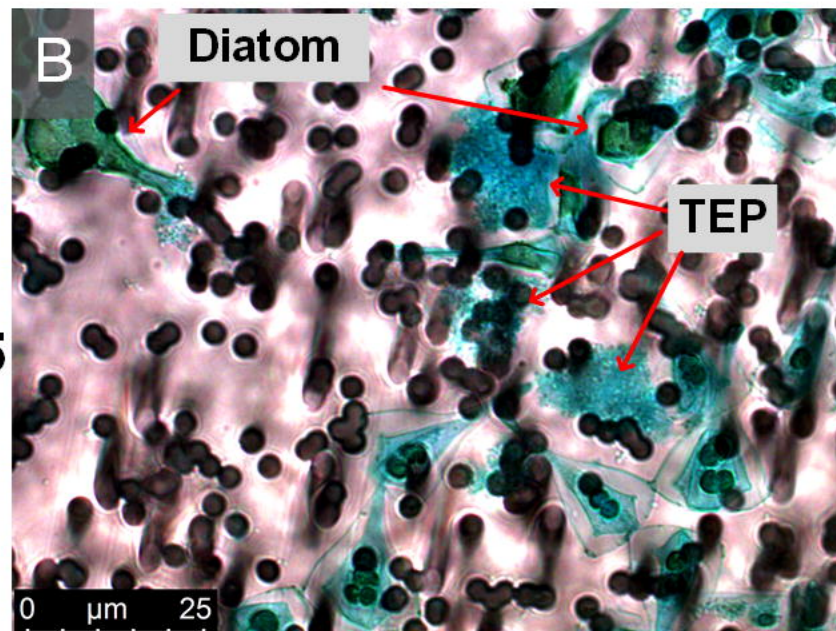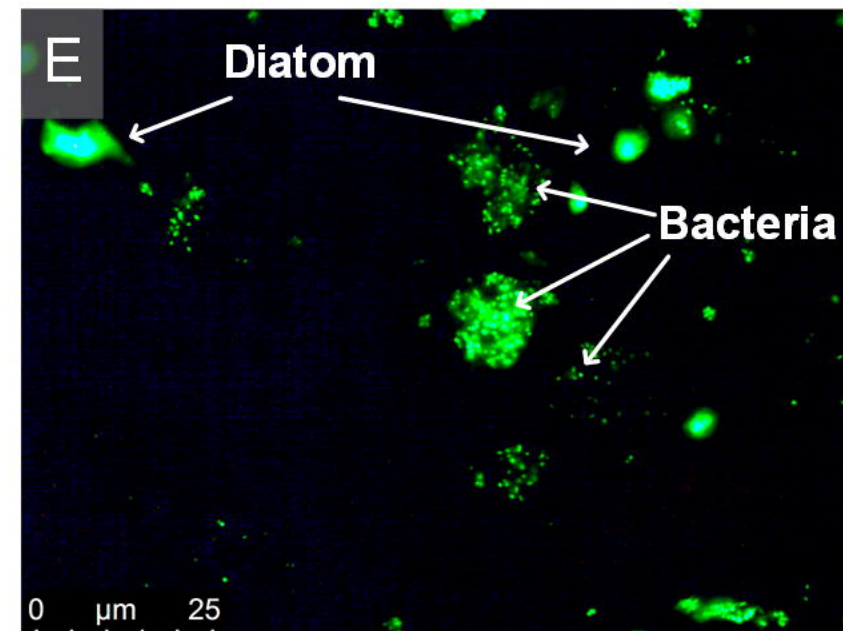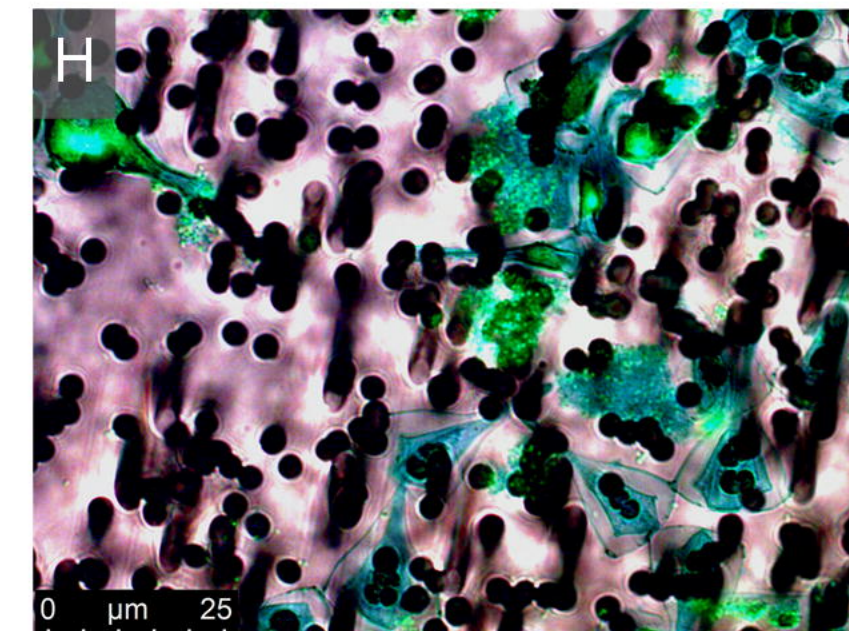

*A. glacialis* with  
*Phaeobacter* sp. F10

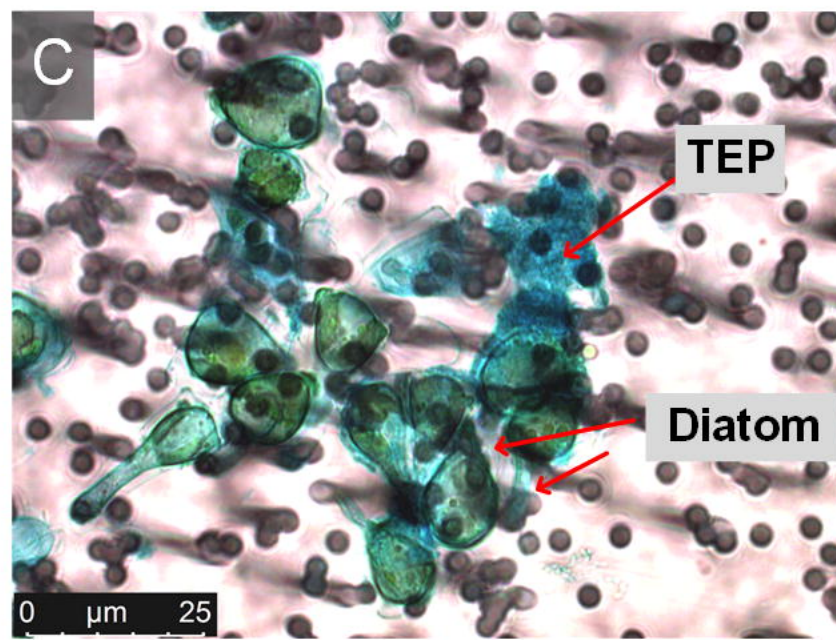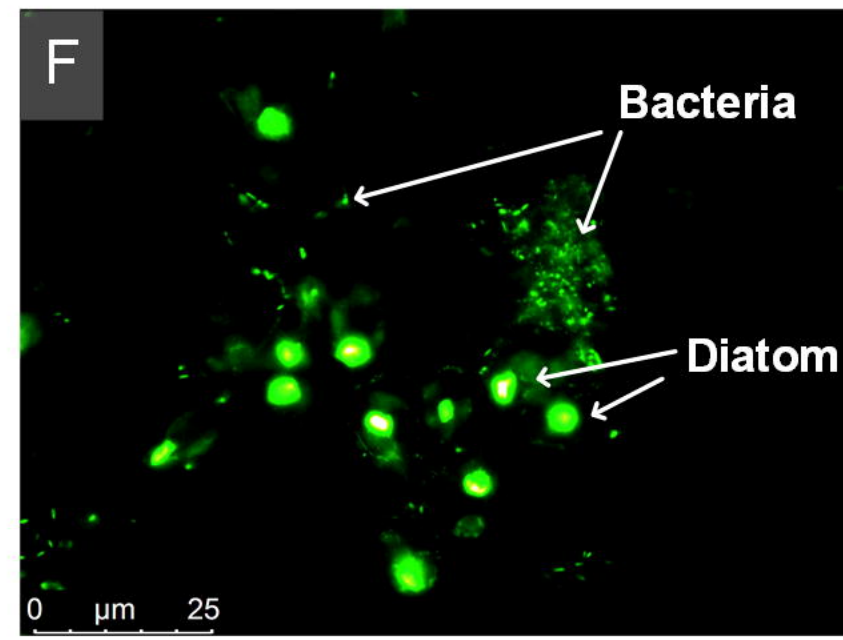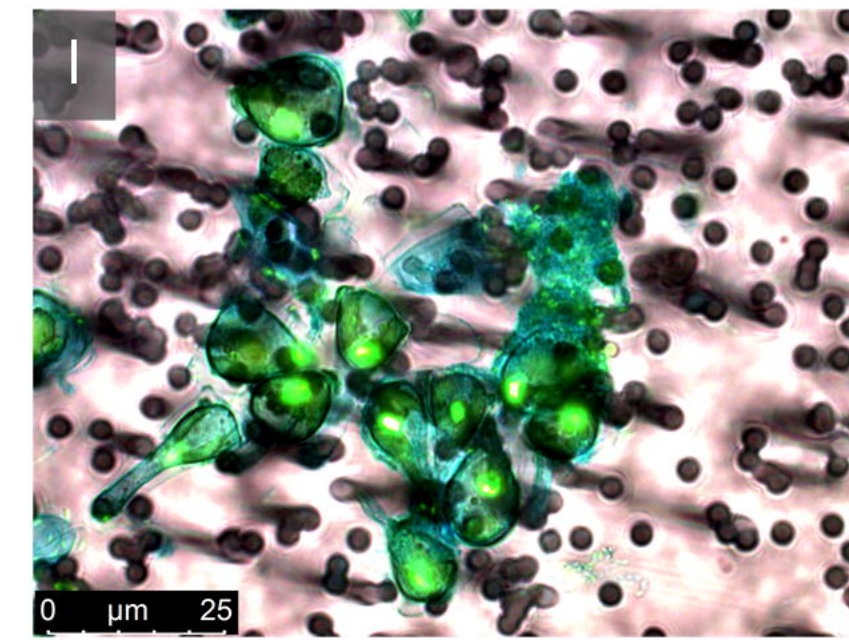



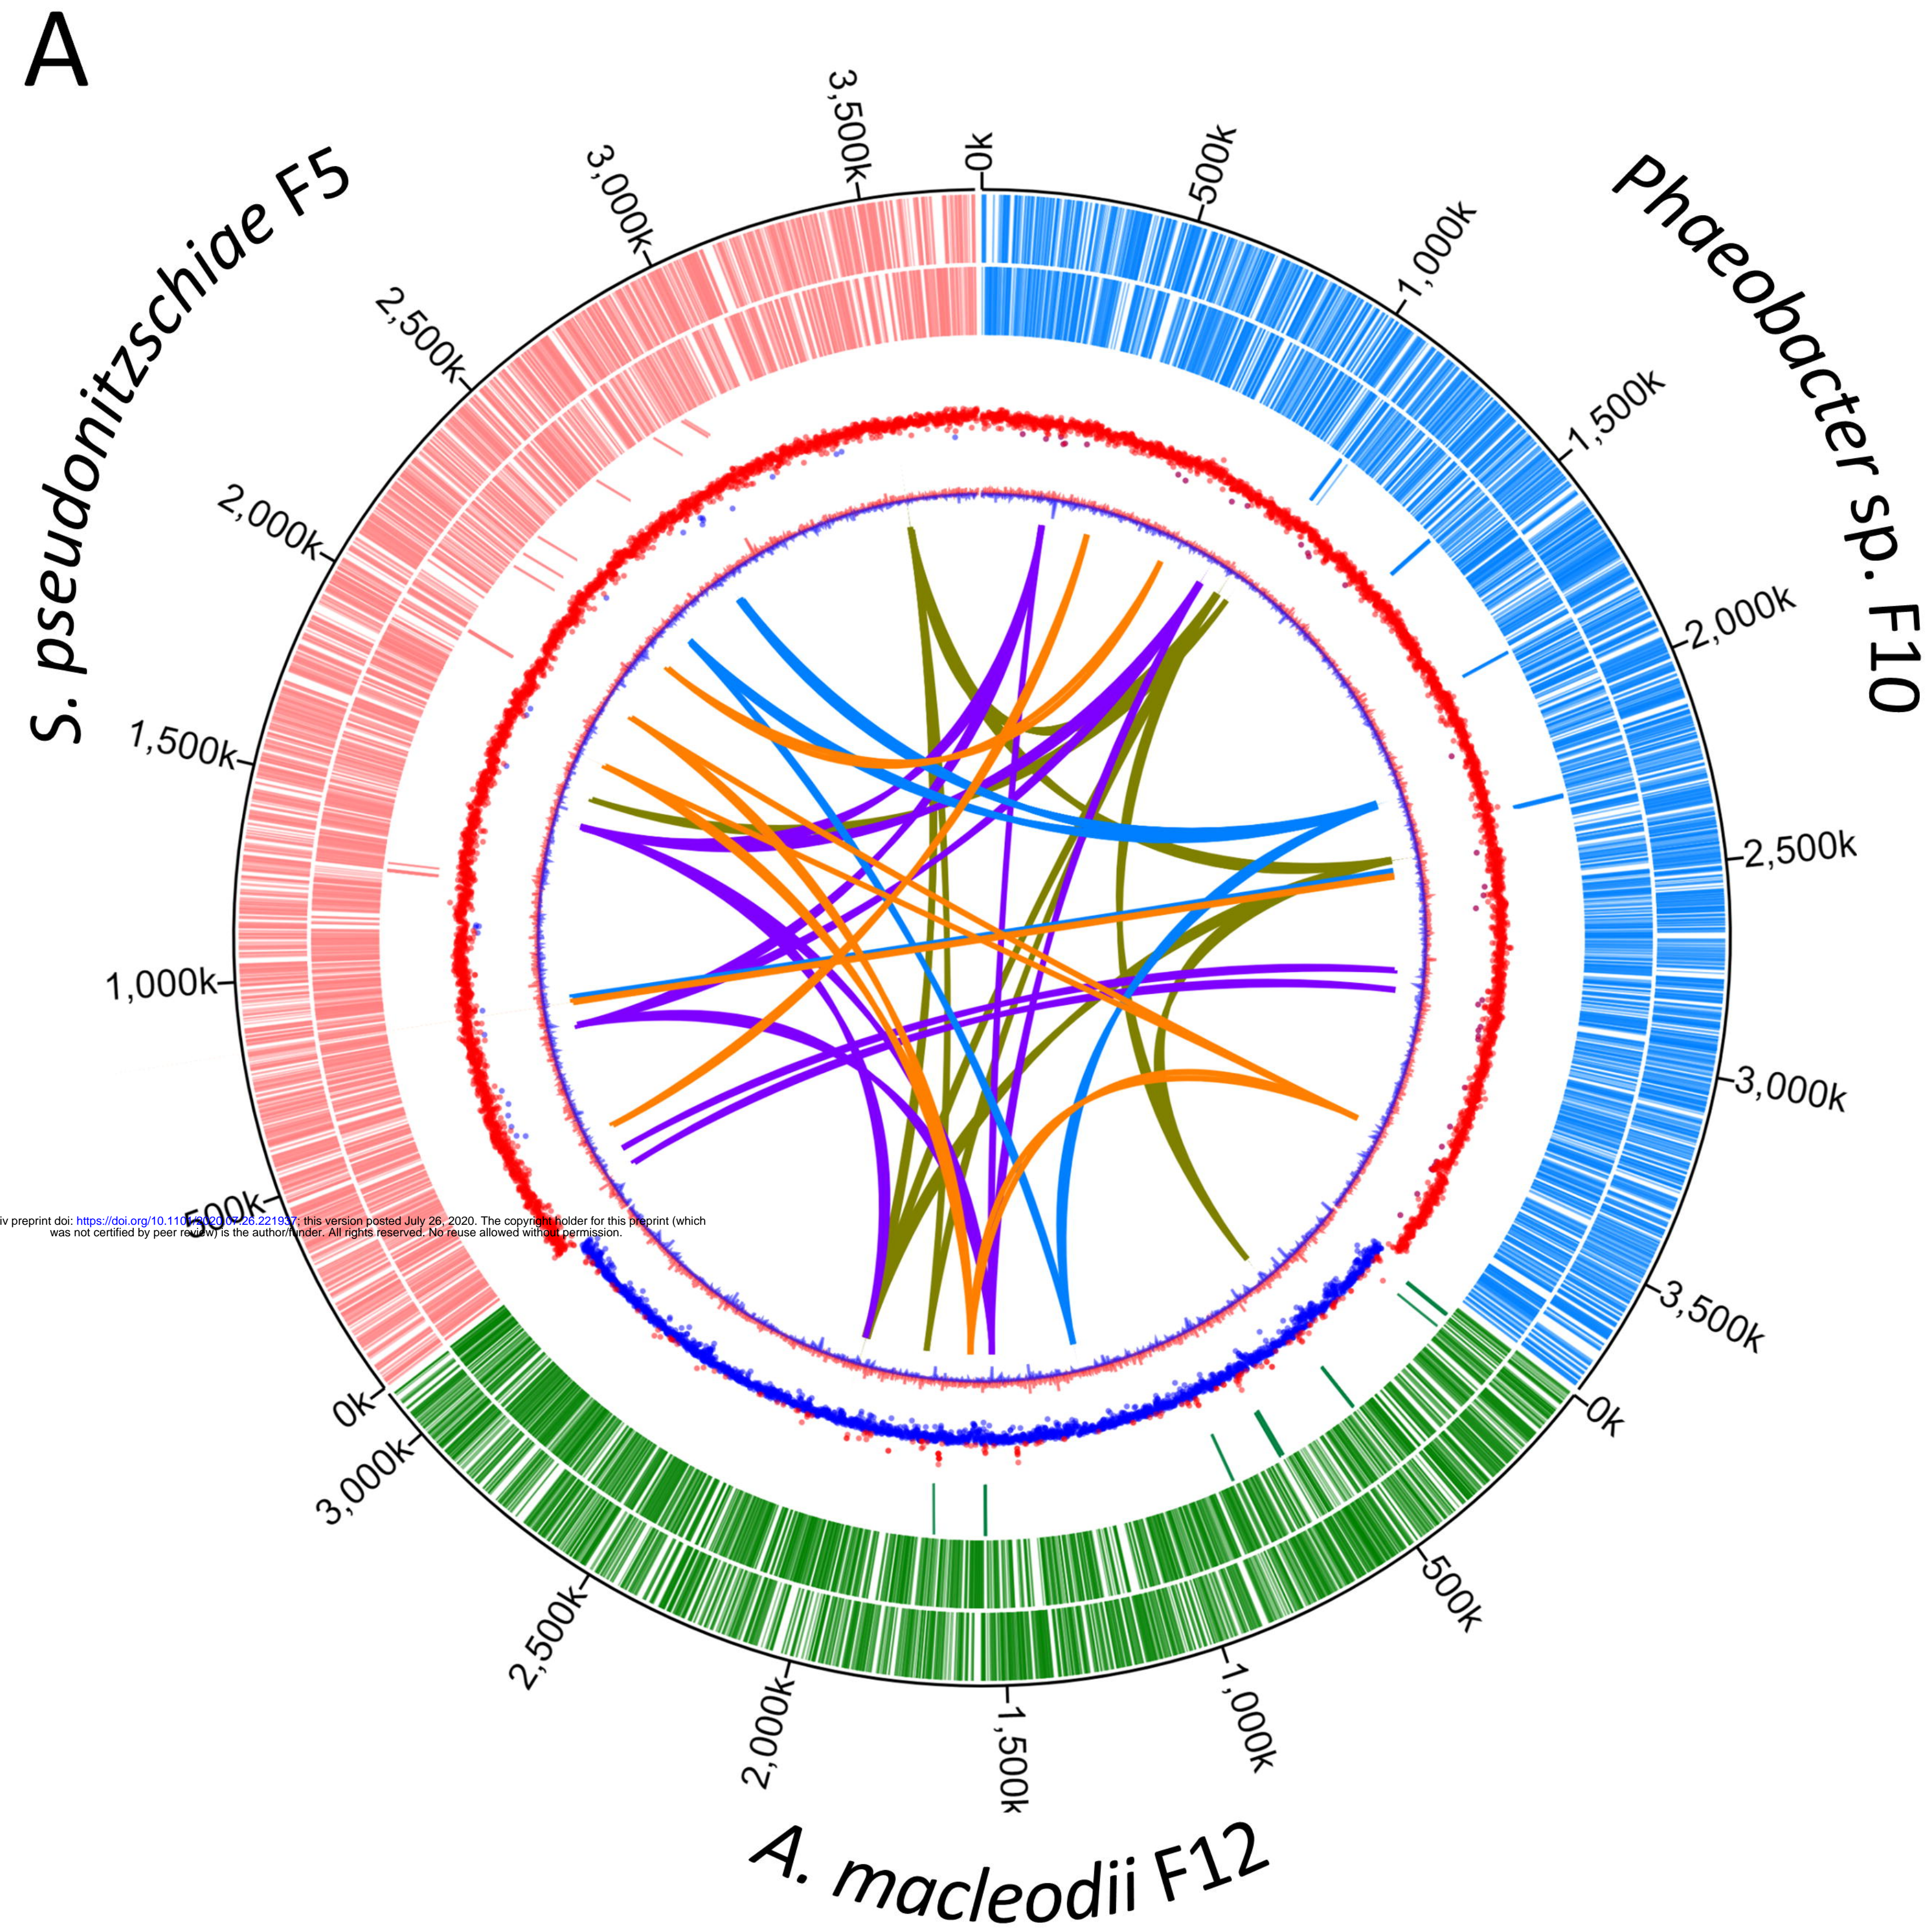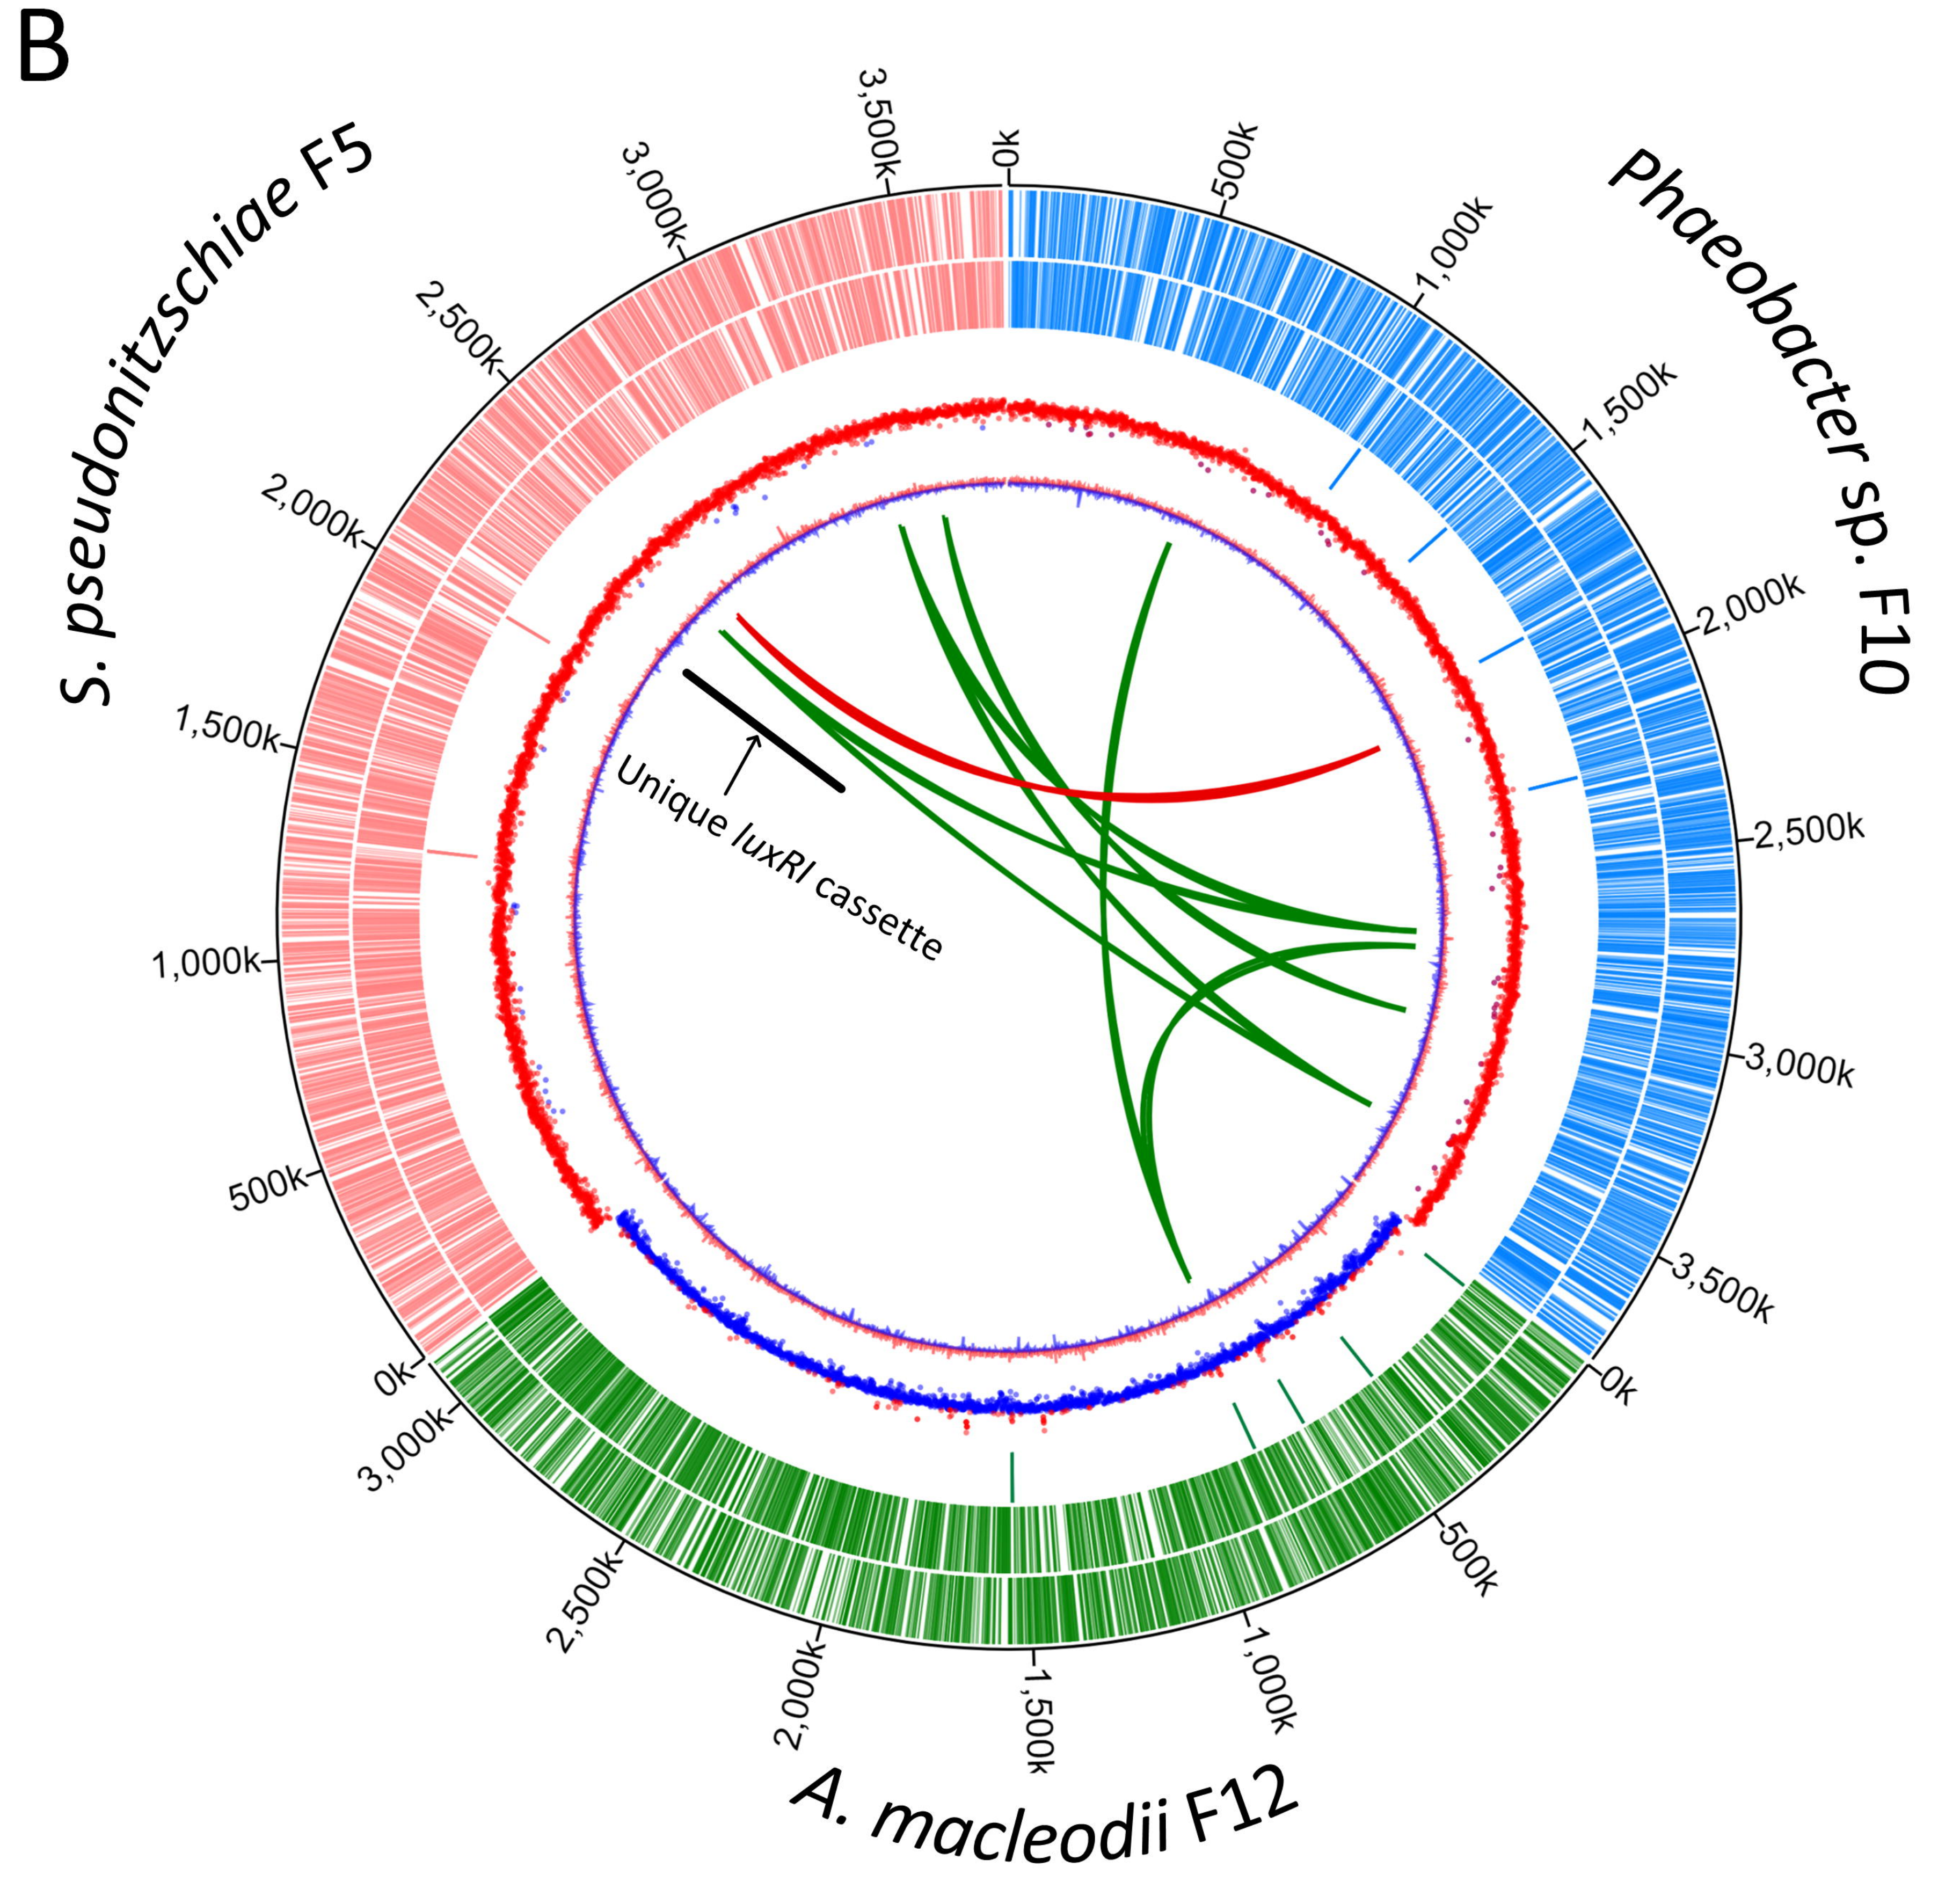

flagella gene
  pili gene  
 exopolysaccharide gene
  chemotaxis gene

*luxR* family gene
  *luxRI* cassette

**a. 3-oxo-C<sub>10</sub>-HSL**

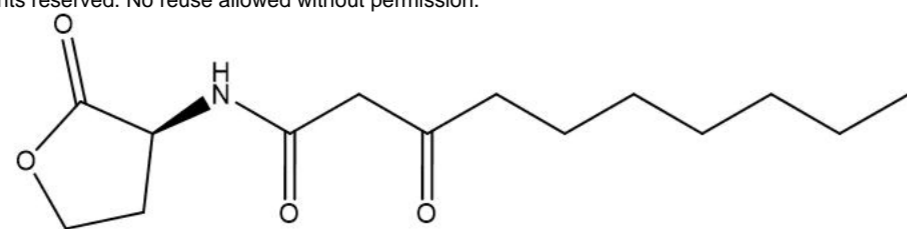

**b. 3-oxo-C<sub>16:1</sub>-HSL**

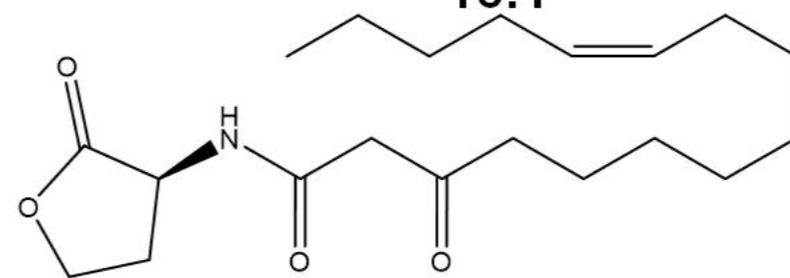

**c. 3-oxo-C<sub>16</sub>-HSL**

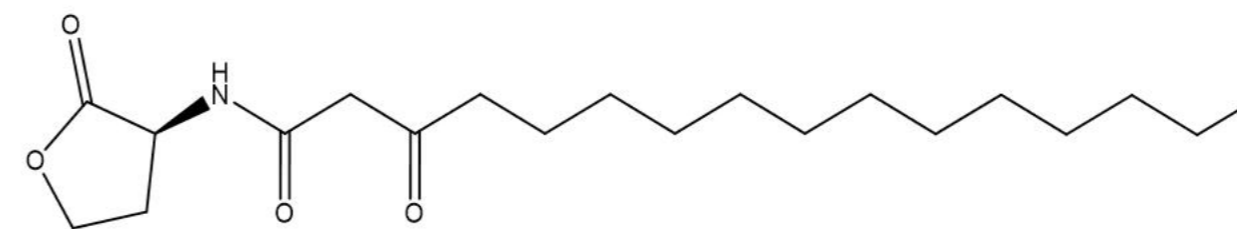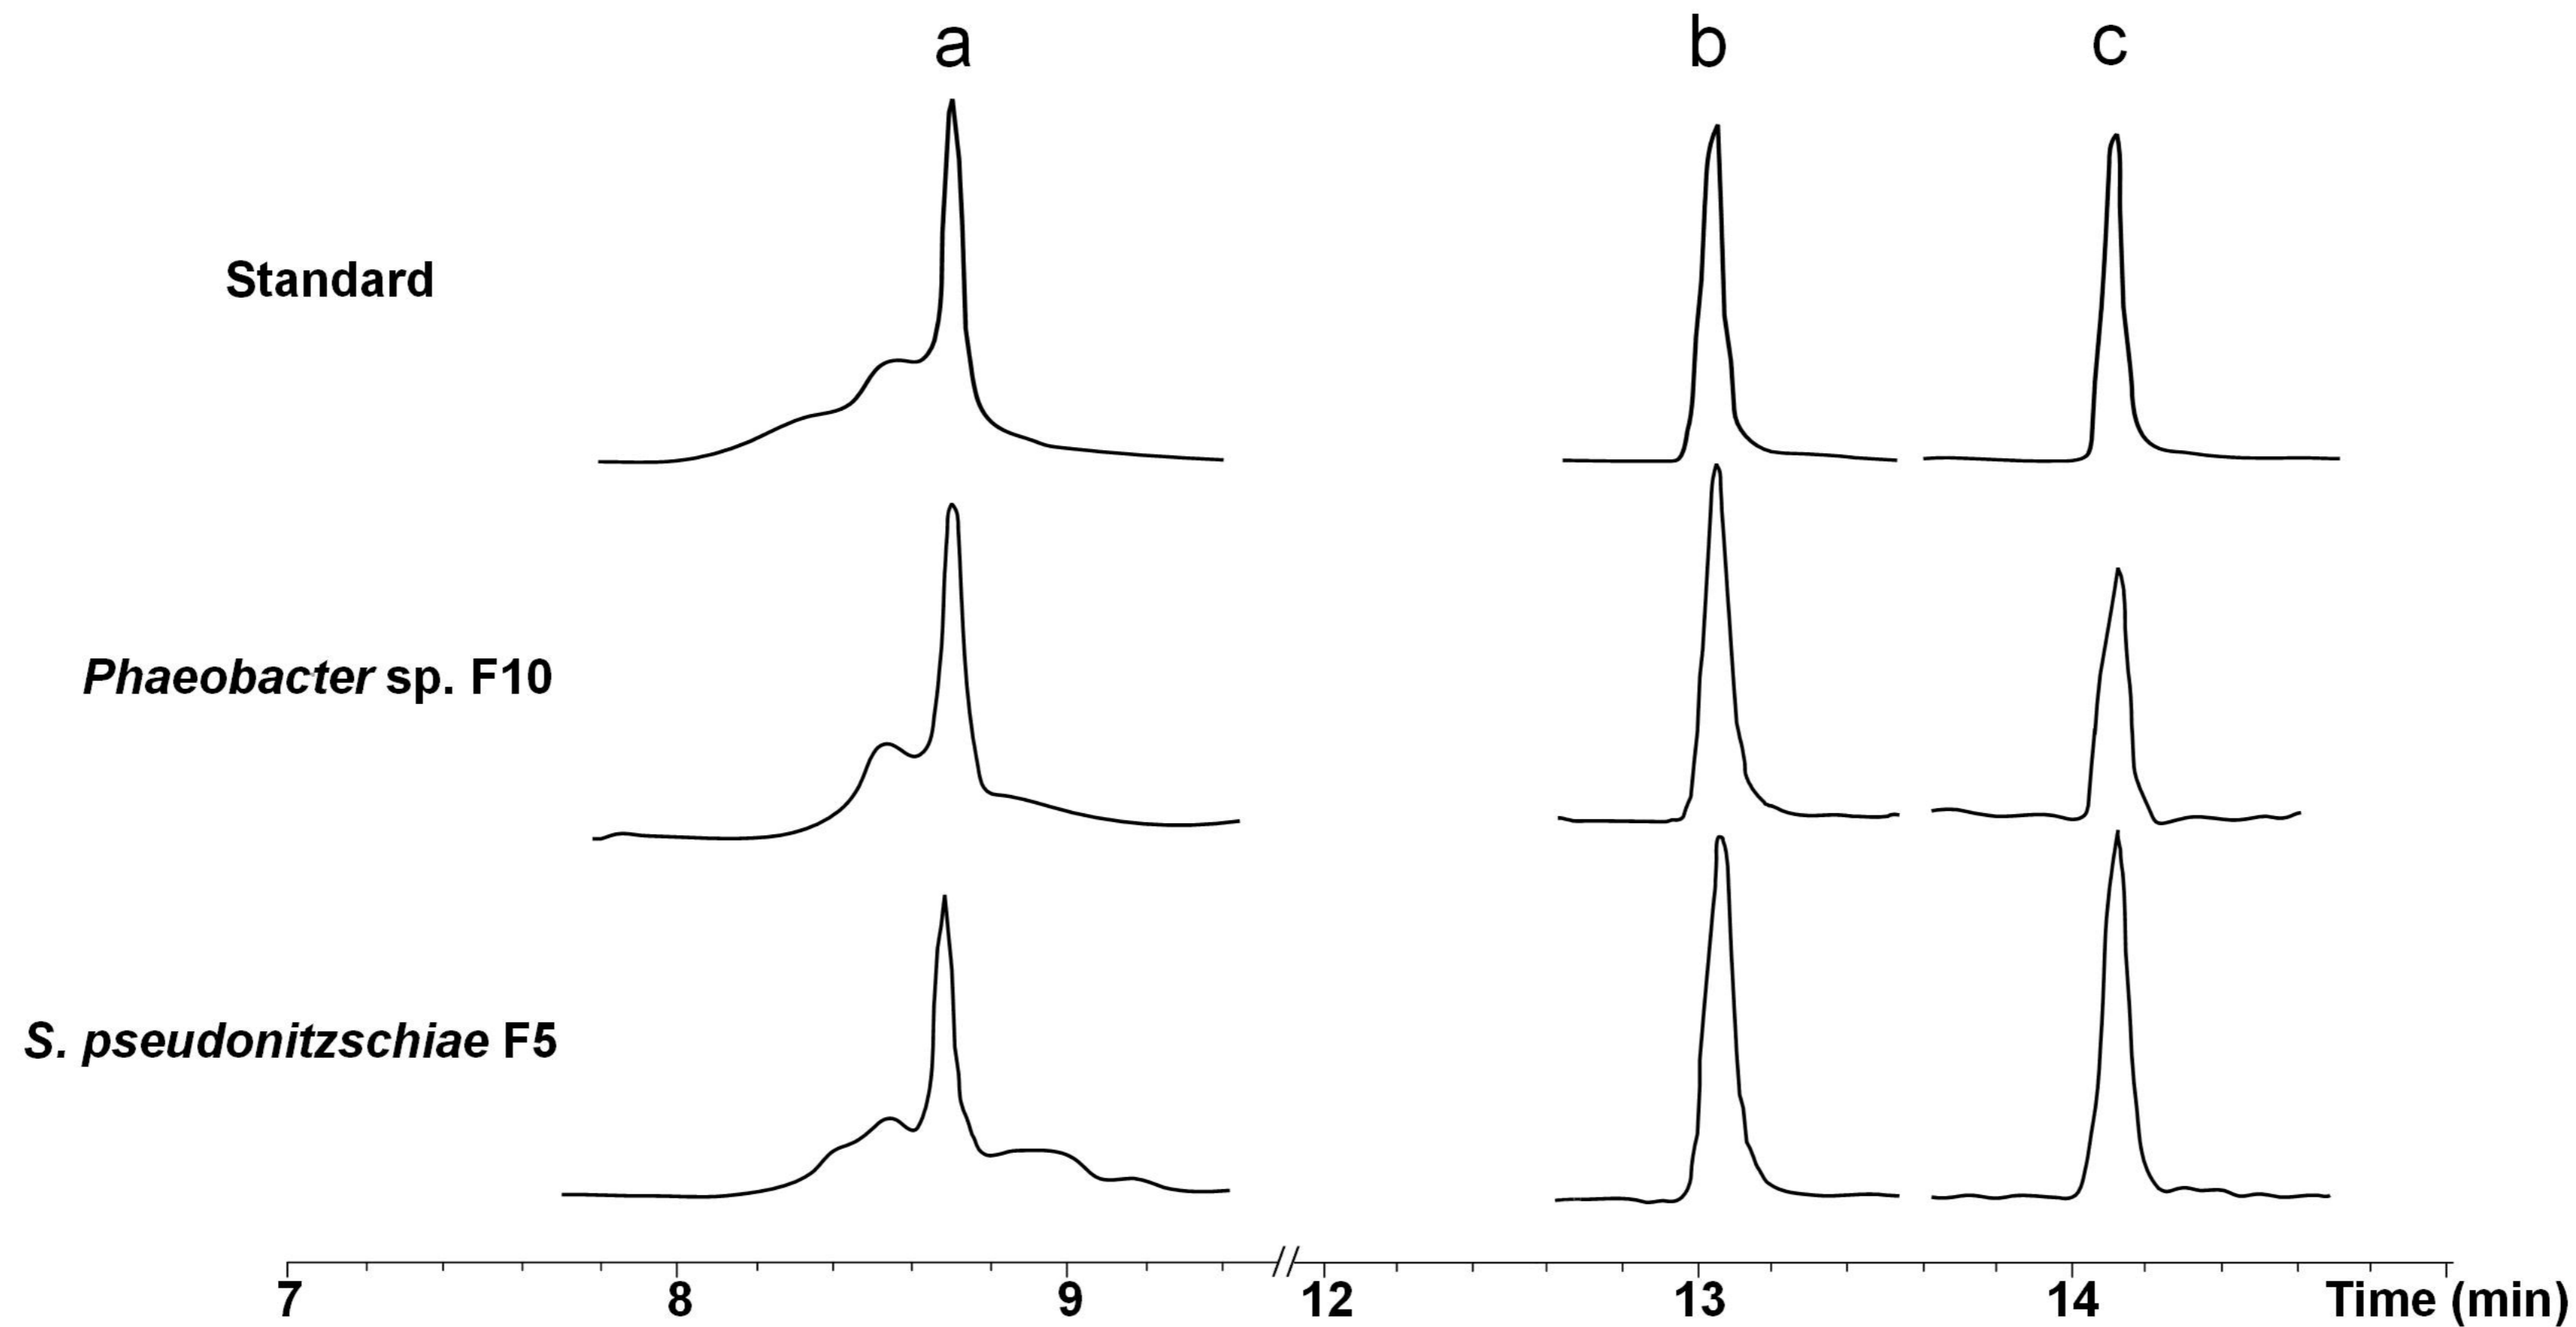

**A**

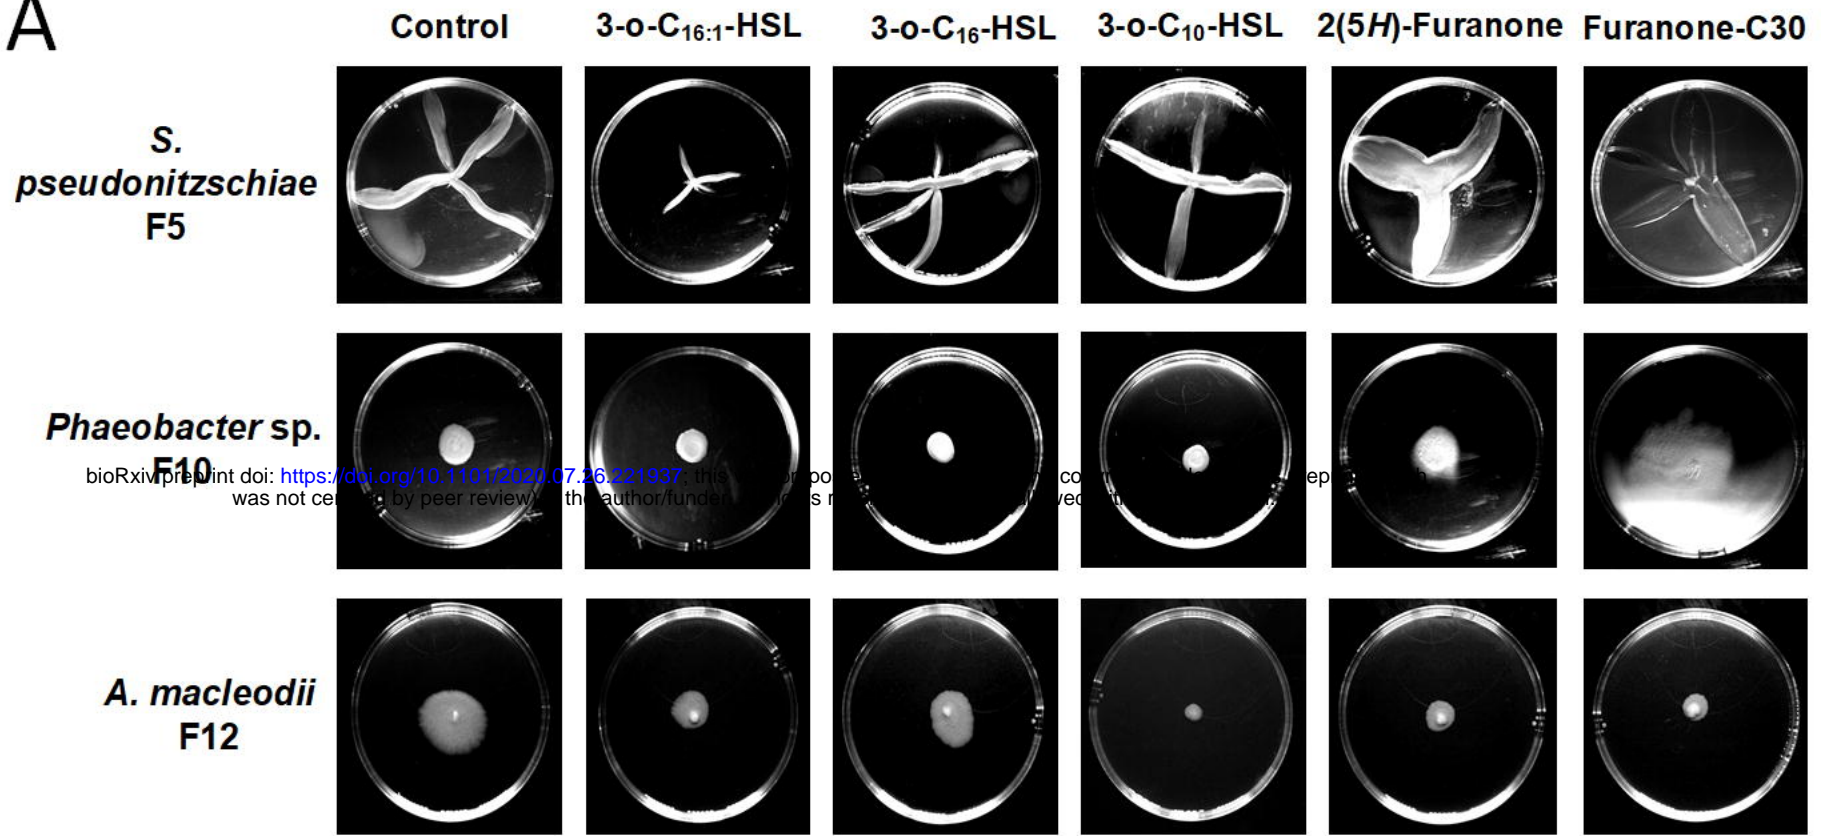

**B**

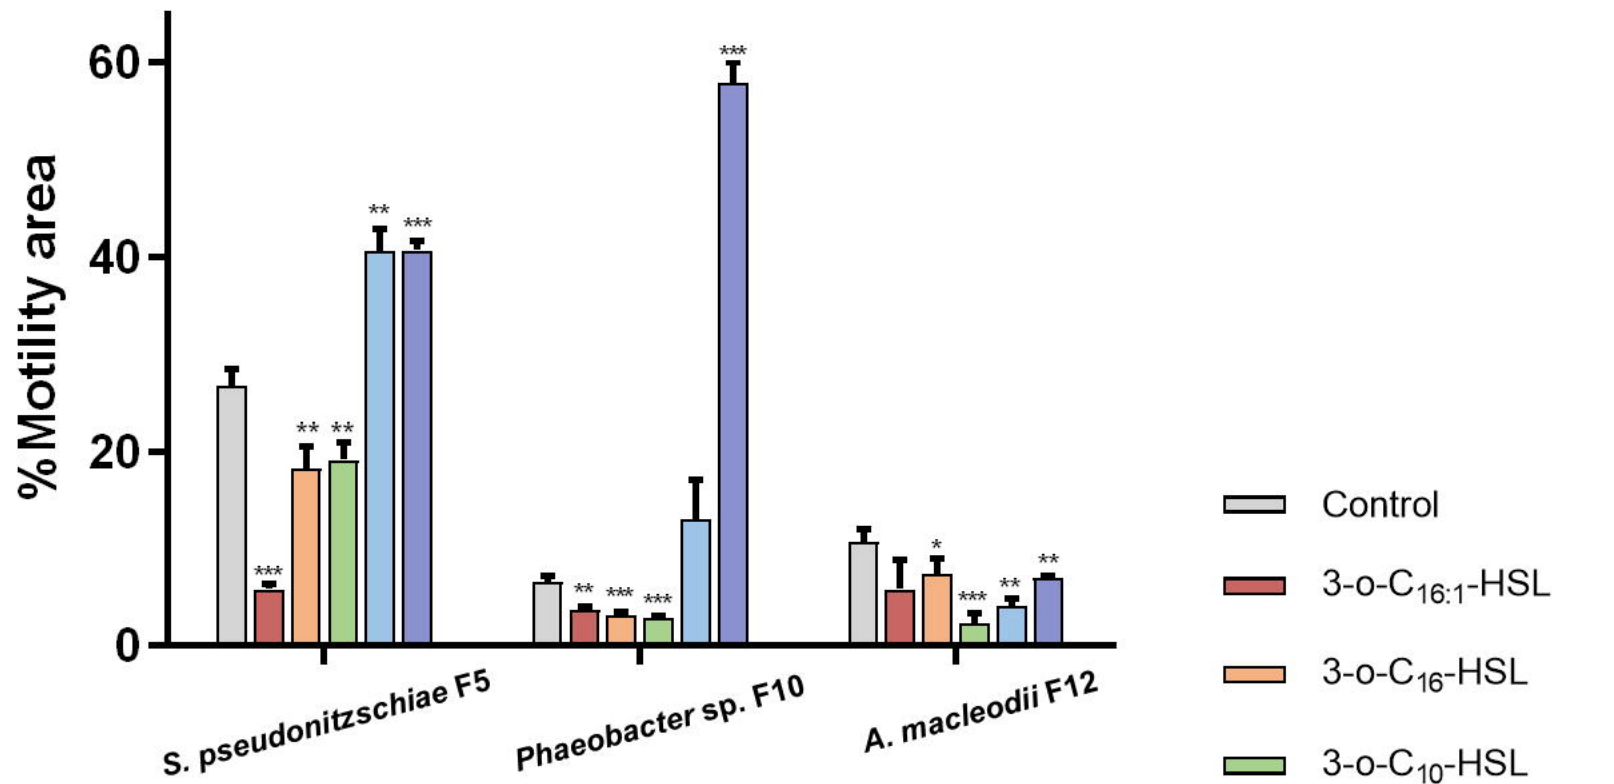

**C**

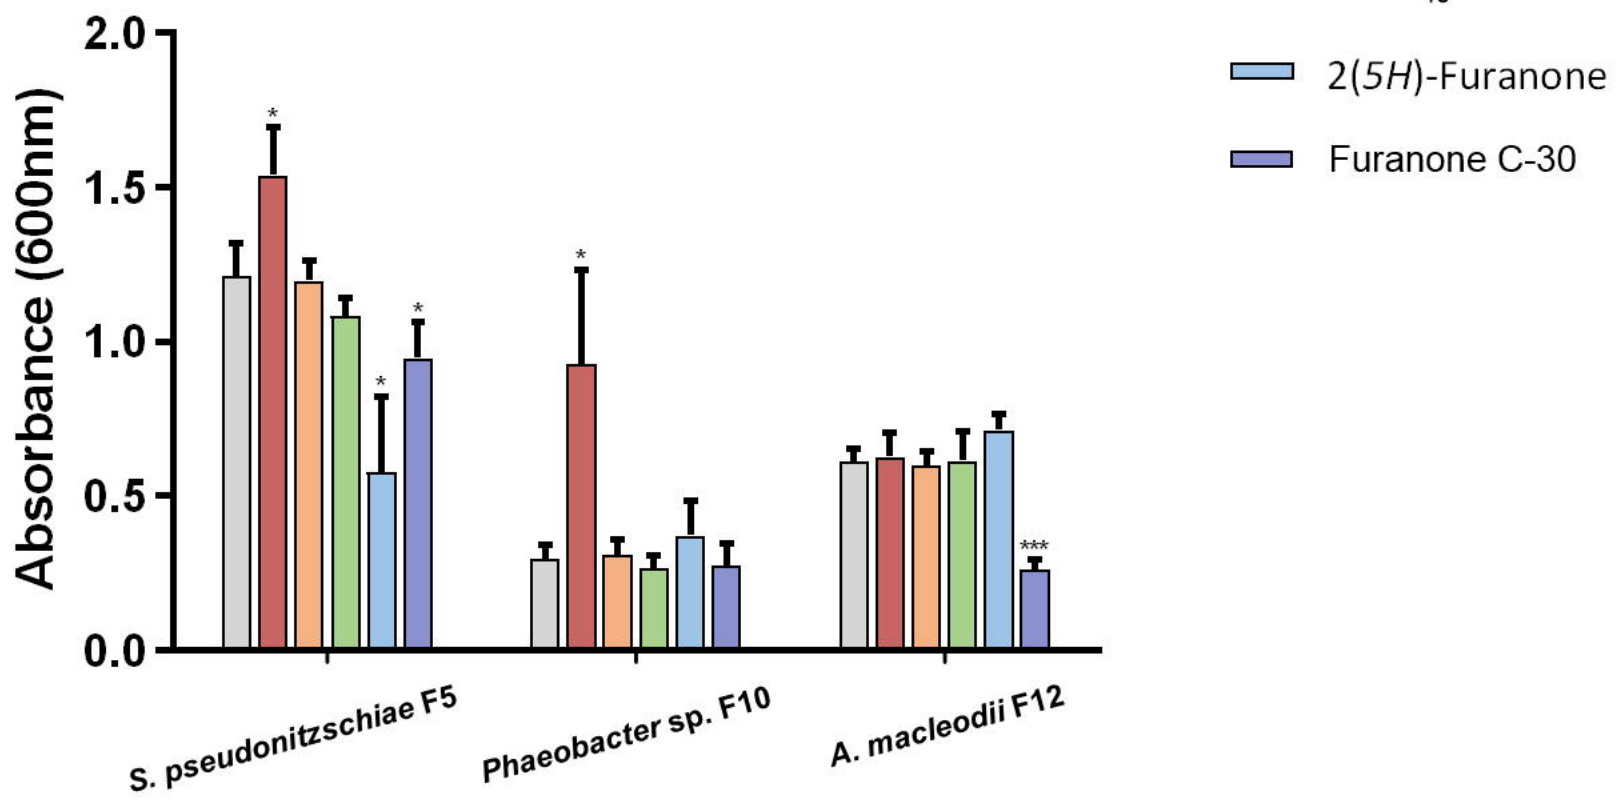

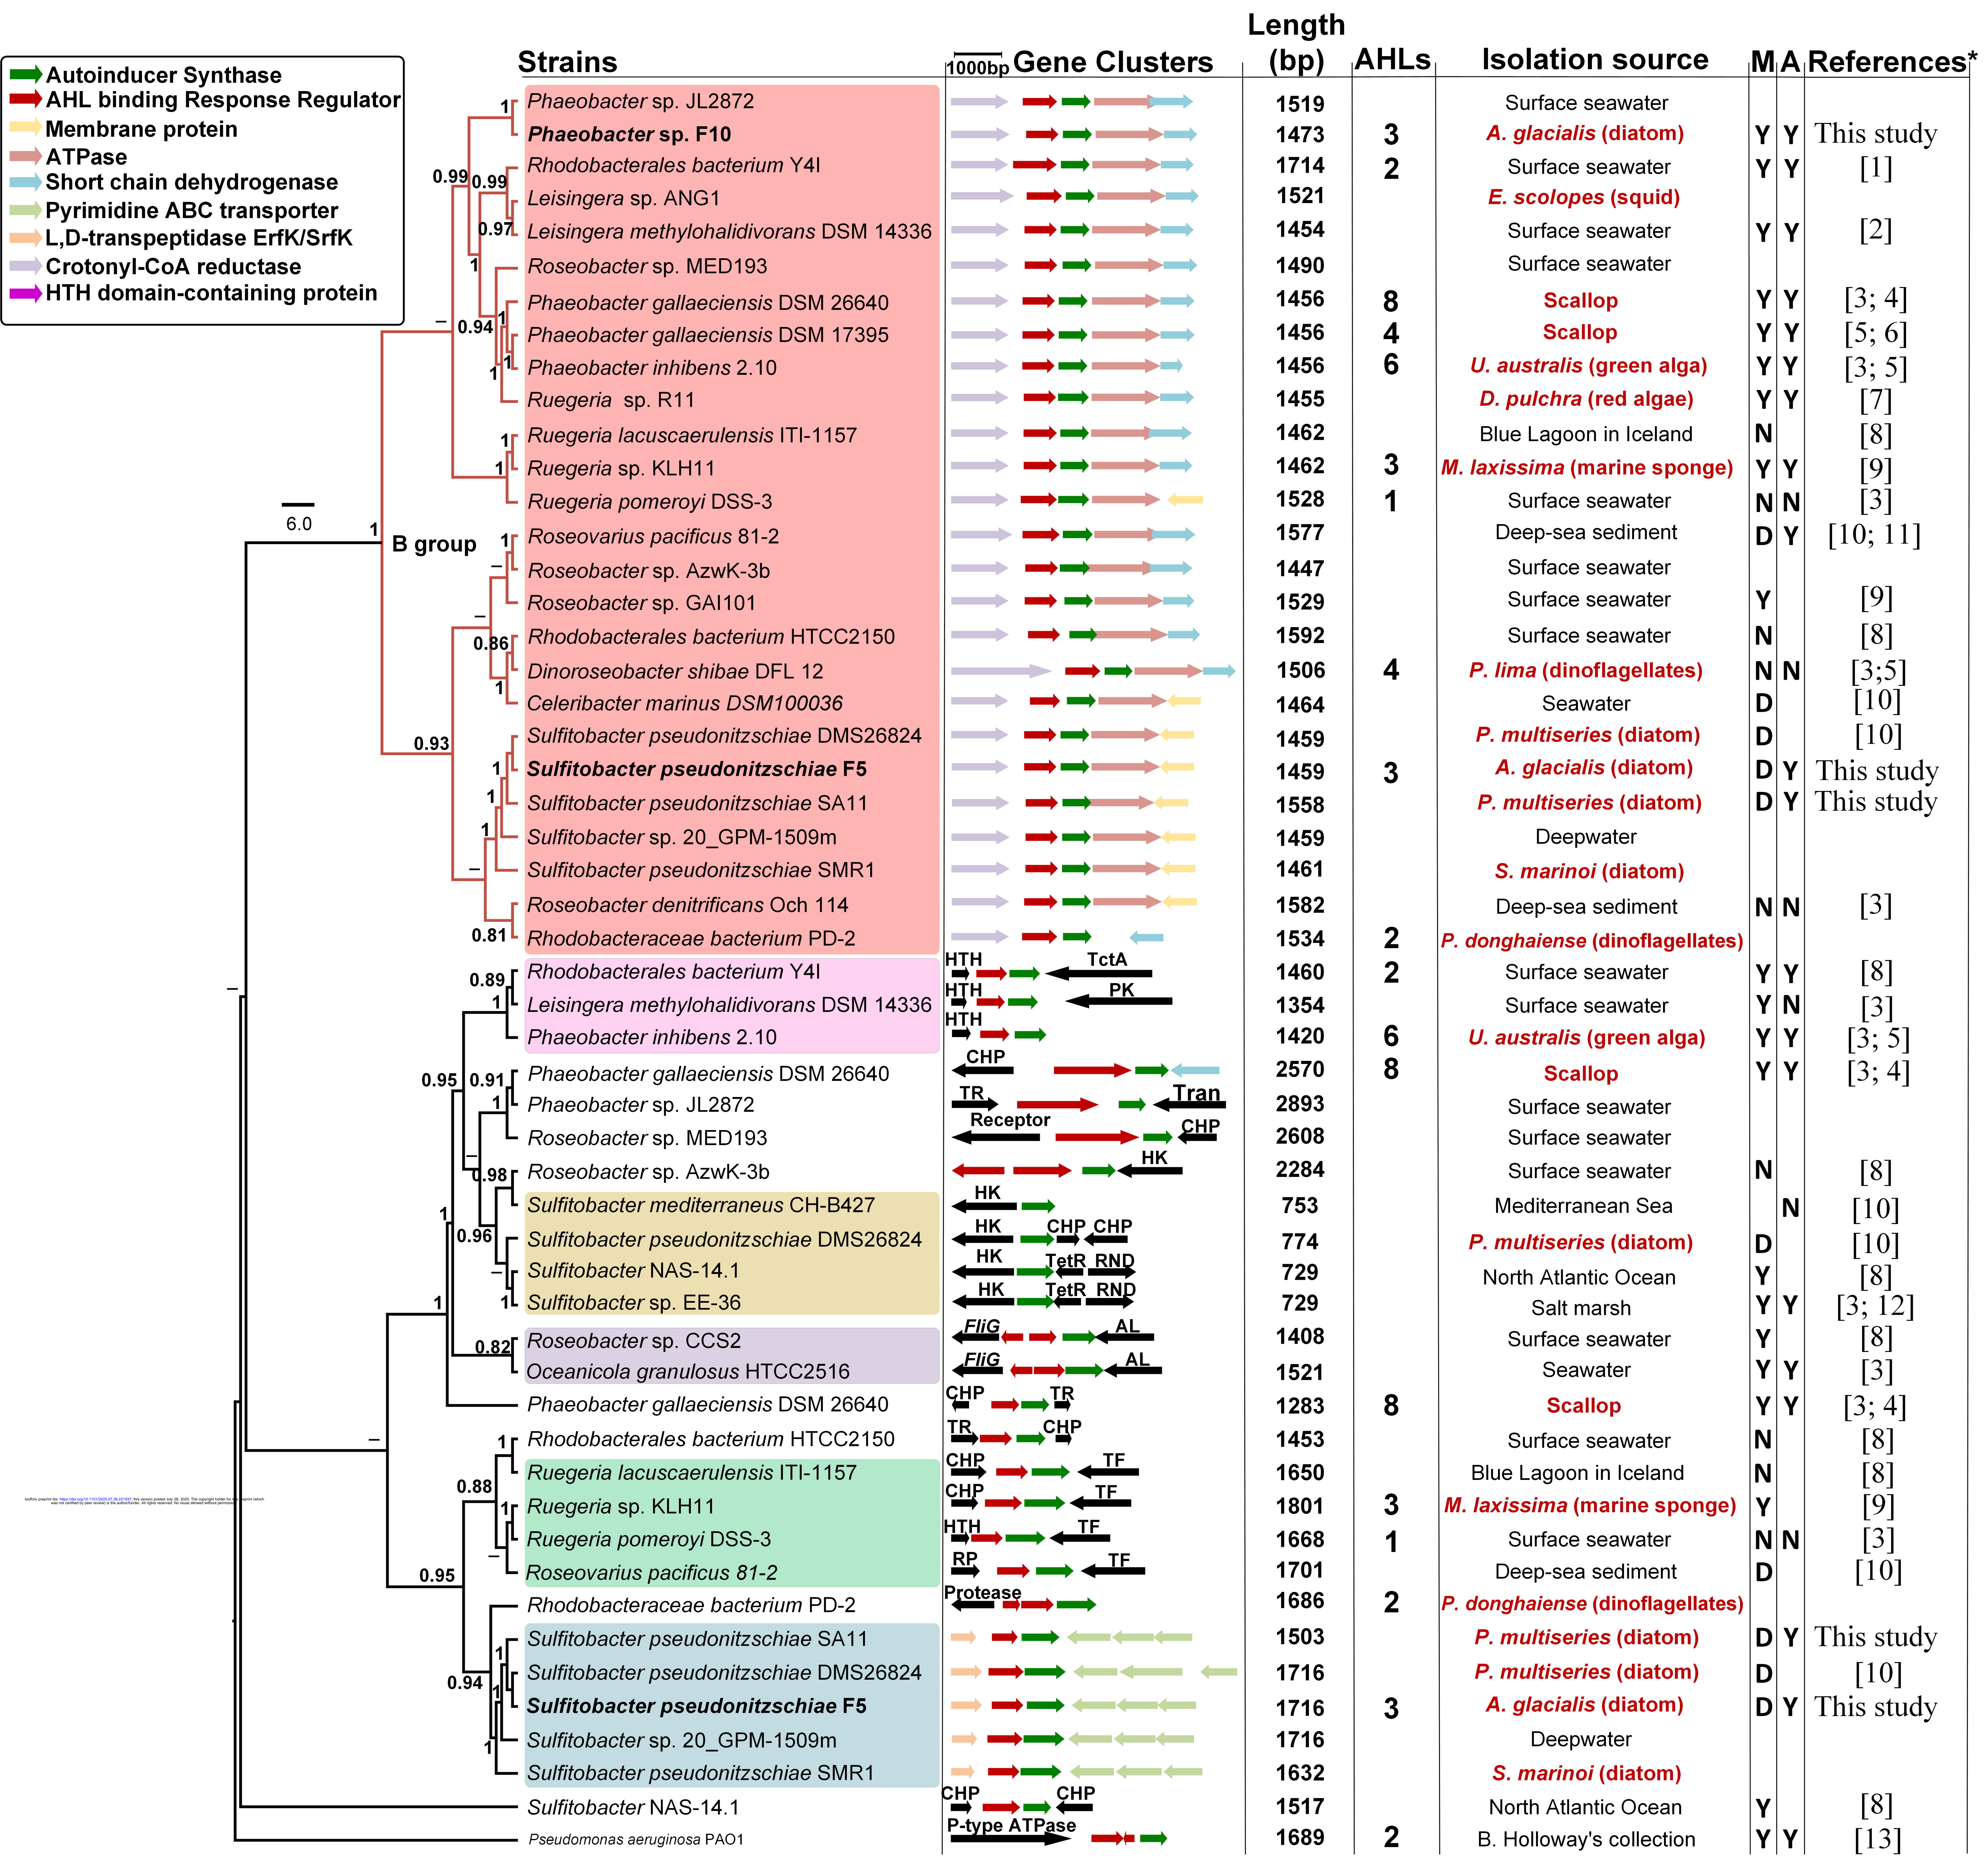

Source: https://www.biorxiv.org/content/10.1101/2020.07.26.221937v1.full.pdf
