# Supplementary material for: Quorum Sensing Regulates ‘swim-or-stick’ Lifestyle in the Phycosphere
Source: bioRxiv or medRxiv preprint supplement (doi:10.1101/2020.07.26.221937), 2020-07-26
Supplement: Supplementary file [file media-1.pdf]

## Supplementary Information for:

### Quorum Sensing regulates ‘swim-or-stick’ lifestyle in the phycosphere

Cong Fei<sup>1</sup>, Michael A. Ochsenkühn<sup>1</sup>, Ahmed A. Shibl<sup>1</sup>, Ashley Isaac<sup>1</sup>, Changhai Wang<sup>2</sup>, Shady A. Amin<sup>1\*</sup>

<sup>1</sup>Marine Microbial Ecology Lab, Biology Program, New York University Abu Dhabi, Abu Dhabi, United Arab Emirates

<sup>2</sup>College of Resources and Environmental Science, Nanjing Agriculture University, Nanjing, China

\*To whom correspondence should be addressed. E-mail: [samin@nyu.edu](mailto:samin@nyu.edu) (SAA)

Supplementary Figures S1-S5

Supplementary Tables S1-S4

References

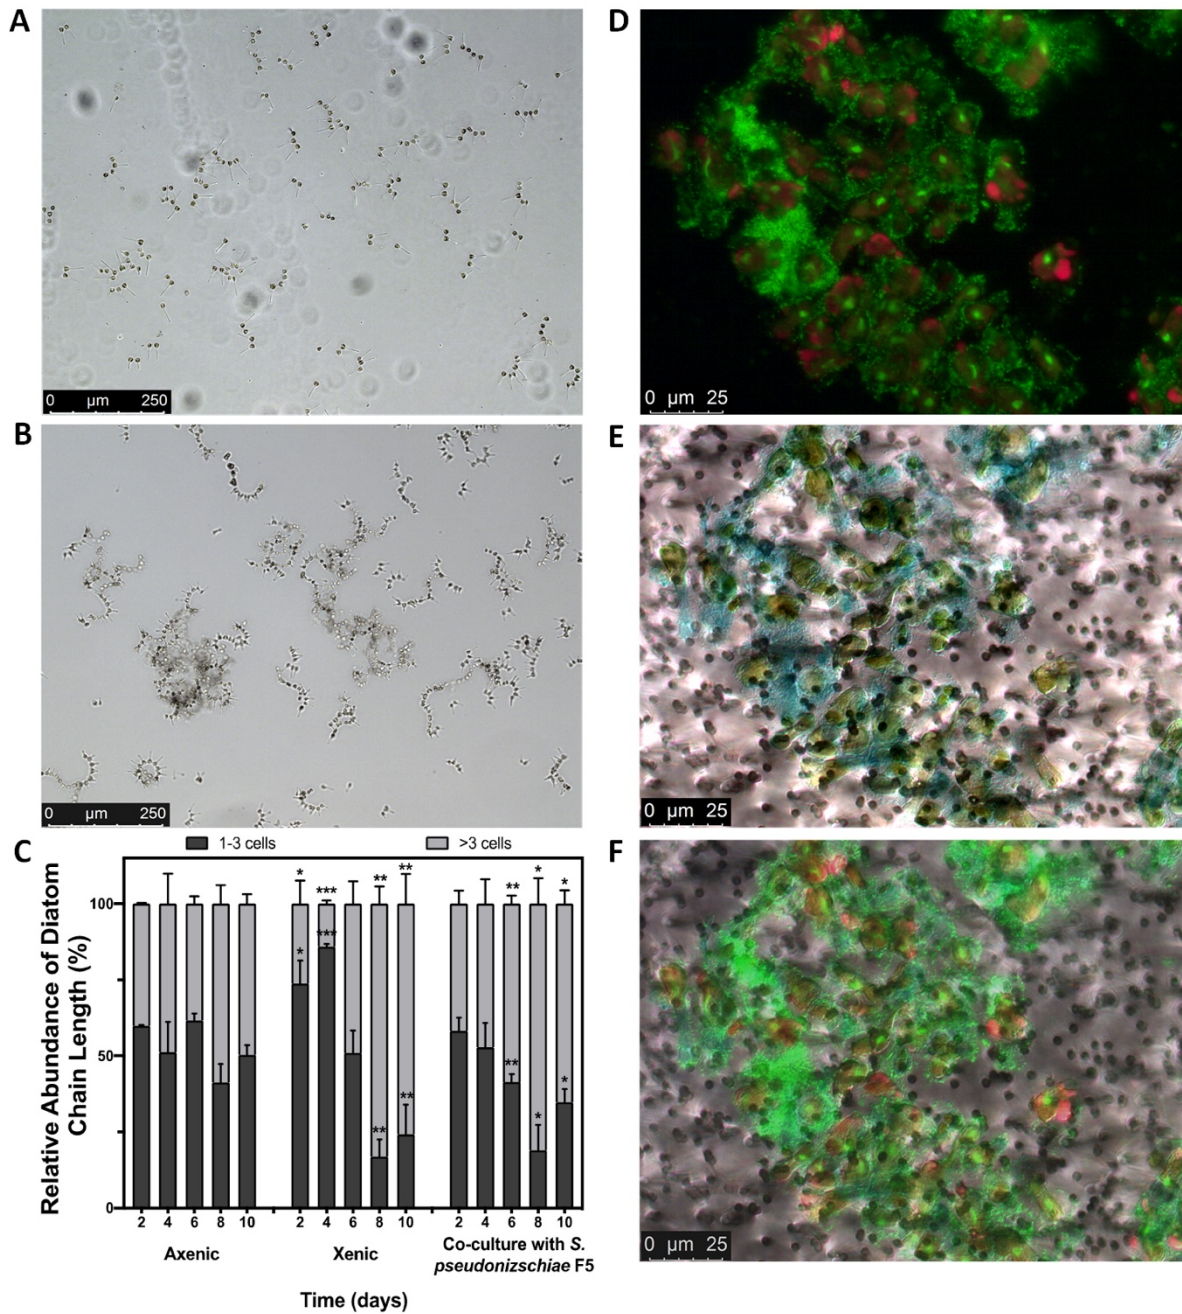

**Supplementary Fig. S1.** Bacteria influence chain length and display strong attachment to *Asterionellopsis glacialis* A3. Bright-field microscopic images of axenic (A) and xenic (B) *A. glacialis* A3 at equivalent cell densities ( $\sim 1.5 \times 10^5$  cells/mL) displaying a general trend towards longer chains in xenic cultures. (C) The relative abundance of different diatom chain lengths in cultures of axenic, xenic *A. glacialis* A3 and co-cultures of *A. glacialis* and *S. pseudonitzschiae* F5. Error bars represent standard deviation (SD) of triplicate cultures. Statistical significance is denoted by \*  $p < 0.05$ , \*\*  $p < 0.01$ , and \*\*\*  $p < 0.001$  for xenic and coculture samples compared to axenic cultures at each time point. (D-F) Micrographs of xenic *A. glacialis* A3 cells and attached bacteria: (D) epifluorescence field, (E) bright field, and (F) merged image of (D) and (E). Red color corresponds to diatom chlorophyll *a*

autofluorescence, while green color indicates nucleic acids of diatoms and bacteria. Blue color in (E) and (F) corresponds to diatom transparent exopolymeric particles (TEP) stained with alcian blue.

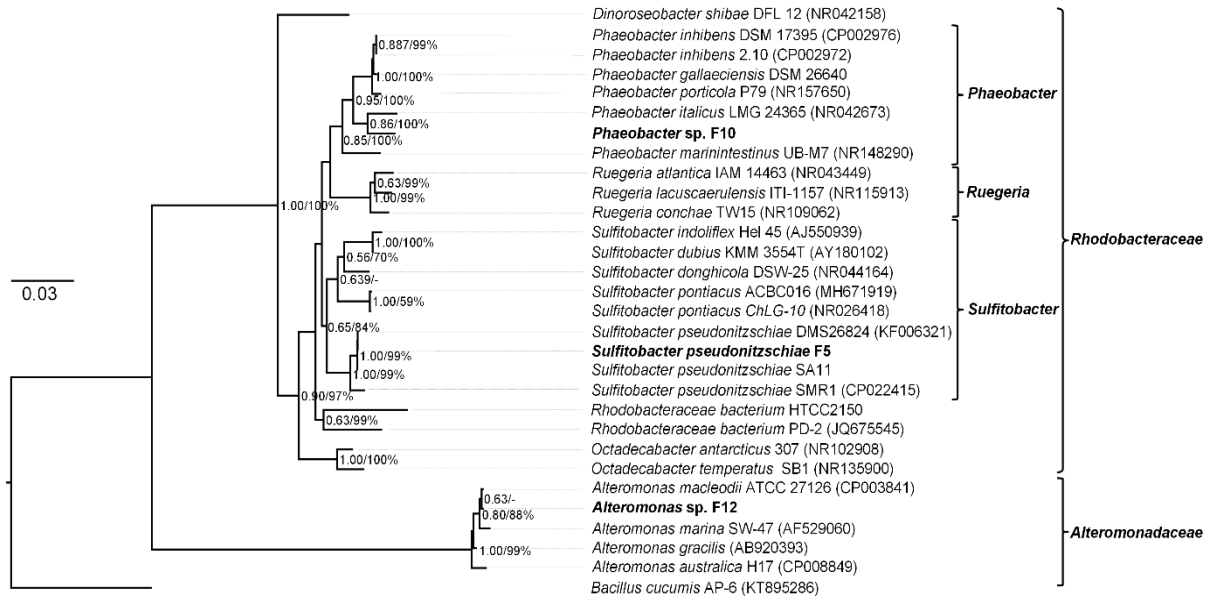

**Supplementary Fig. S2.** Bayesian phylogenetic tree of the 16S rRNA gene of cultivable bacteria from the *A. glacialis* A3 microbial consortium. Three bacteria isolated from *A. glacialis* A3 are highlighted in bold. Genera and families of the different bacteria are indicated to the right. Posterior probabilities and ML bootstrap values are listed adjacent to branches, respectively. GenBank accession numbers are denoted in parentheses.

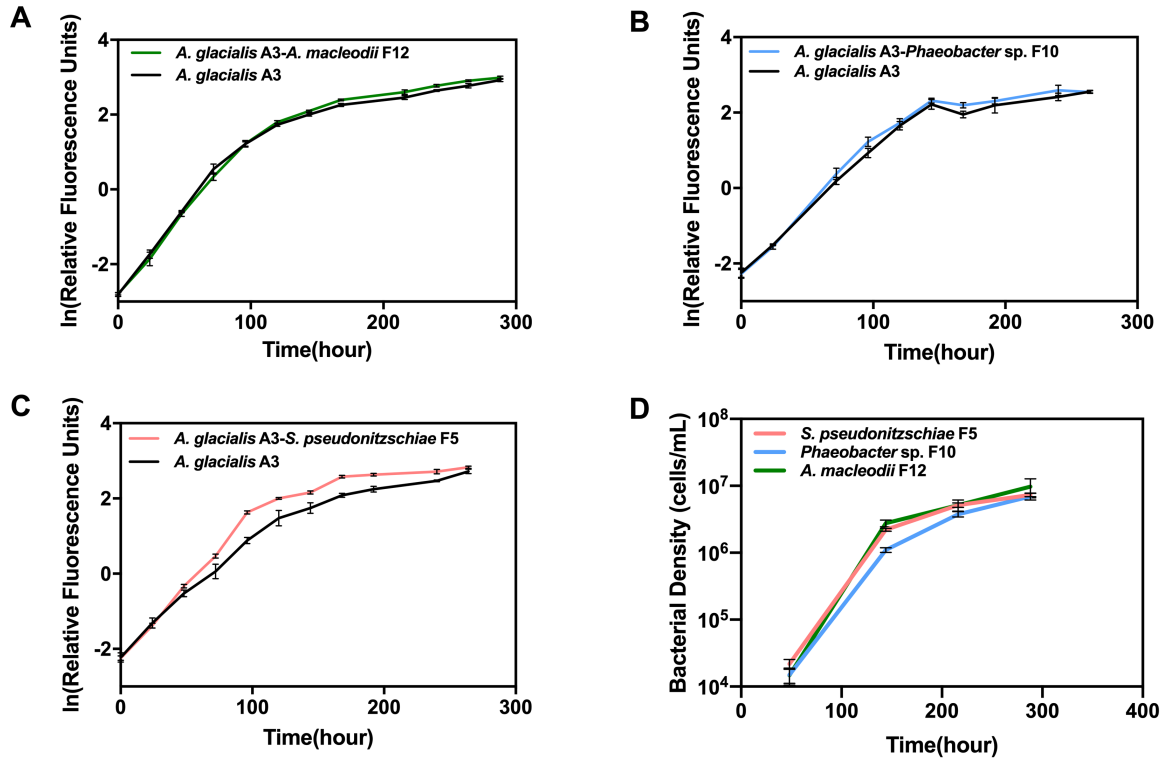

**Supplementary Fig. S3.** Effects of bacterial isolates on the specific growth of *A. glacialis* A3. Co-culture of *A. glacialis* A3 with **(A)** *Alteromonas macleodii* F12, **(B)** *Phaeobacter* sp. F10, and **(C)** *S. pseudonitzschiae* F5. **(D)** Cell density of each bacterium co-cultured with A3. Error bars represent S.D. of six replicates.

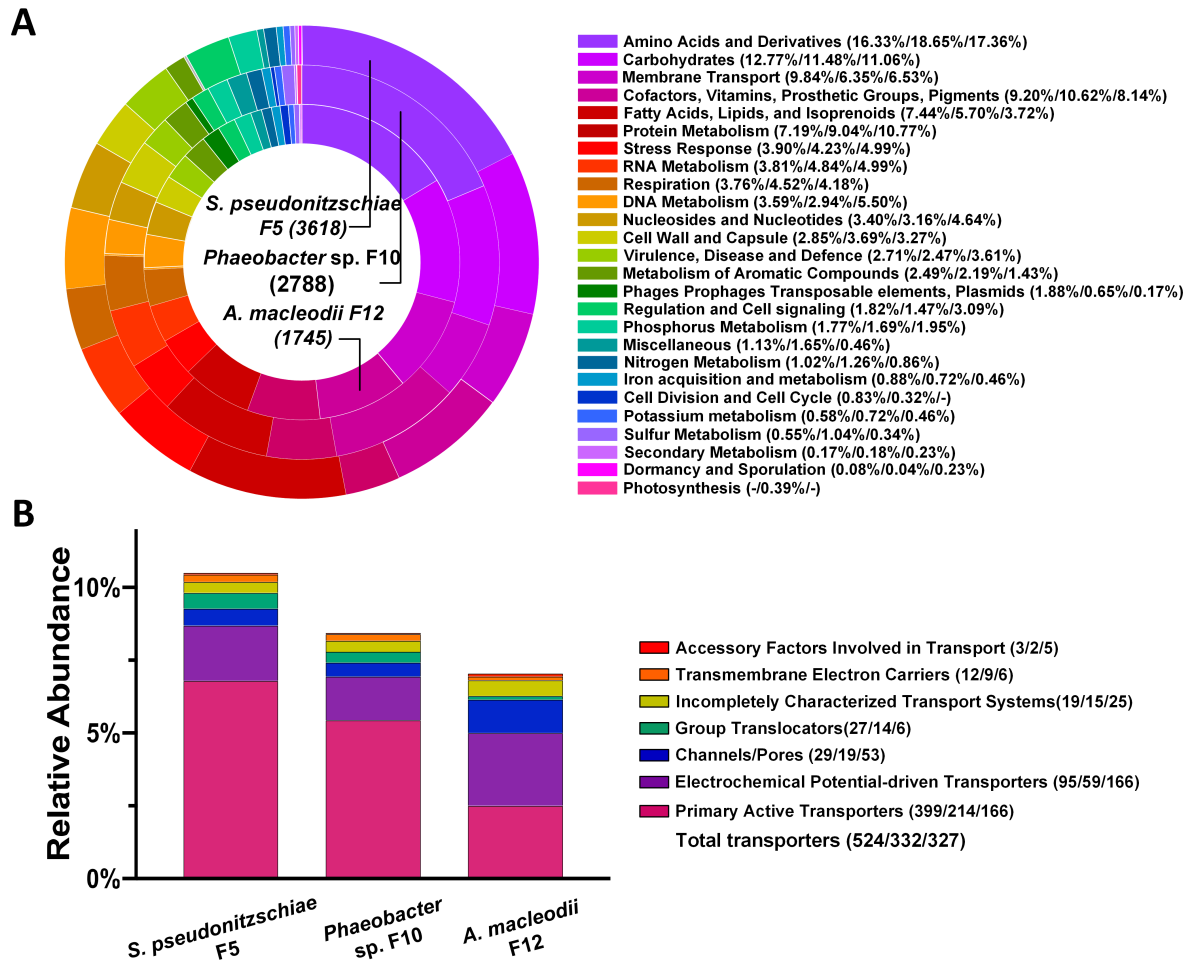

**Supplementary Fig. S4.** Genome-wide analysis of annotated genes for *S. pseudonitzschiae* F5, *Phaeobacter* sp. F10, and *A. macleodii* F12. **(A)** Number of total annotated genes for each bacterium is listed in parentheses on the pie chart. Proportion of genes in each category belonging to *S. pseudonitzschiae* F5 (left), *Phaeobacter* sp. F10 (middle) and *A. macleodii* F12 (right) are listed next to each category. **(B)** Normalized number of total putative transporters to the genome size of each bacterium. Number of genes in each category belonging to *S. pseudonitzschiae* F5 (left), *Phaeobacter* sp. F10 (middle) and *A. macleodii* F12 (right) are listed next to each category.

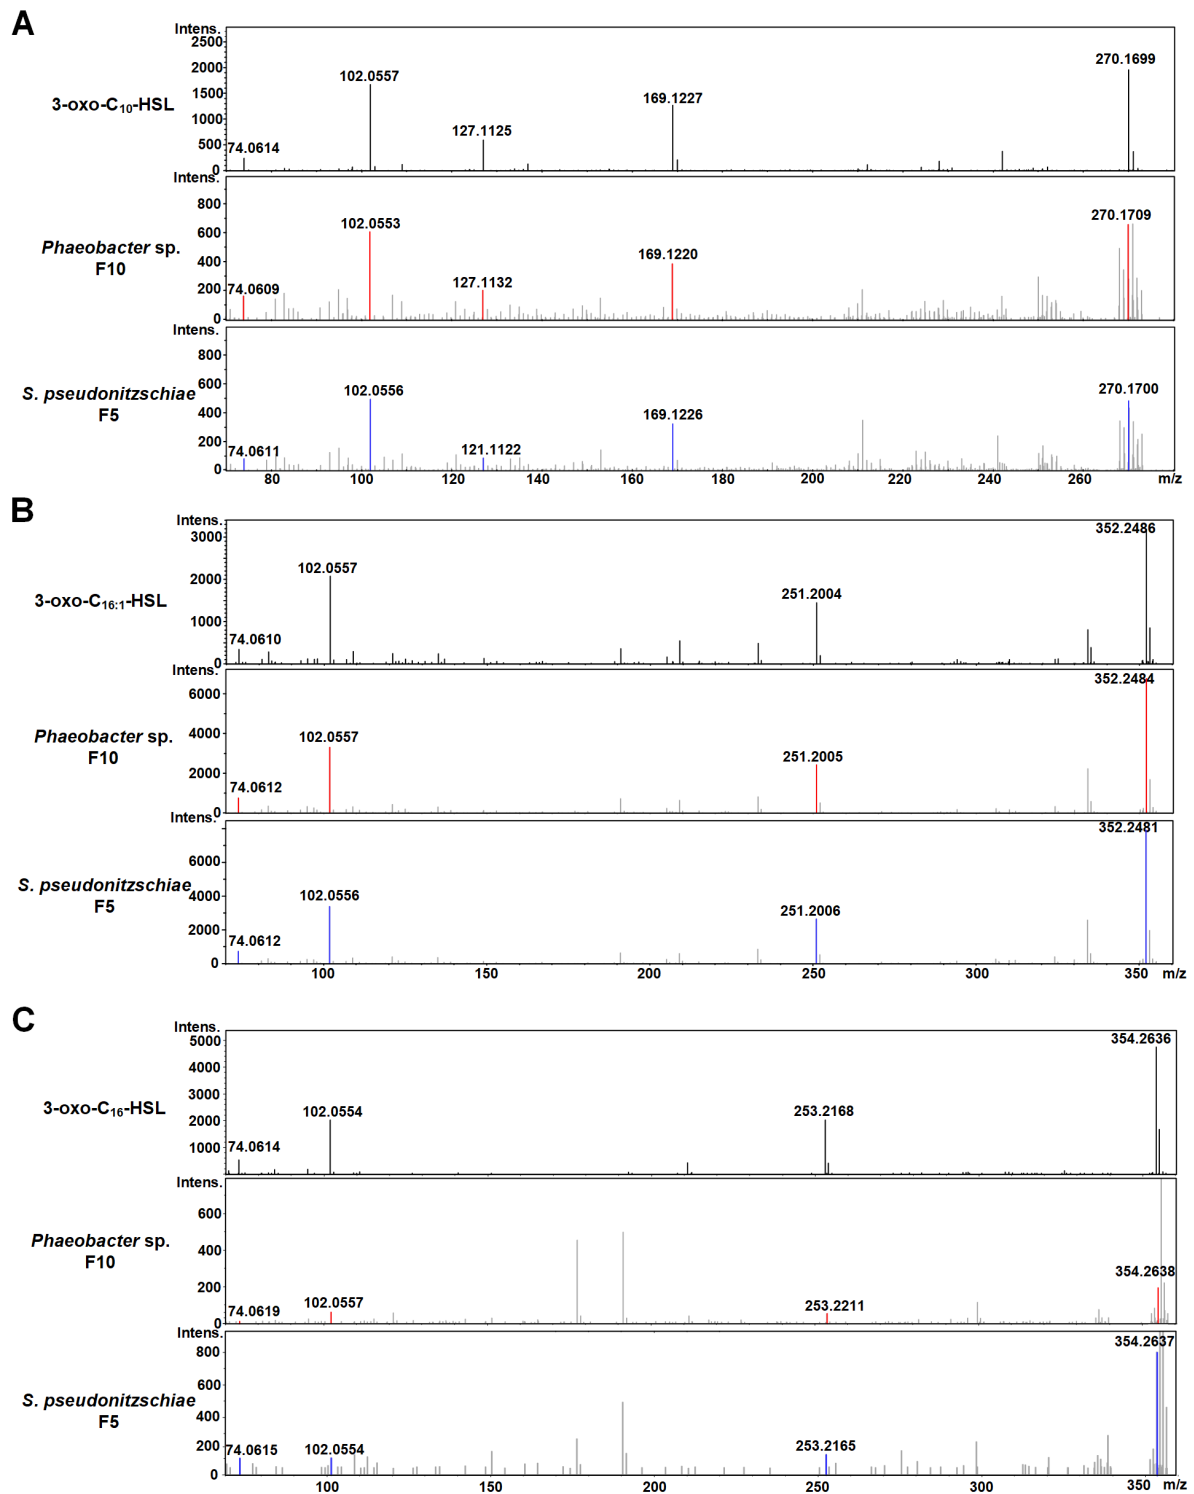

**Supplementary Fig. S5.** UHPLC-MS/MS spectra of three AHLs from purchased standards, supernatants of *S. pseudonitzschiae* F5 or *Phaeobacter* sp. F10. MS/MS spectra of **(A)** 3-oxo-C<sub>10</sub>-HSL, **(B)** 3-oxo-C<sub>16:1</sub>-HSL and **(C)** 3-oxo-C<sub>16</sub>-HSL are shown and specific fragment ion peaks are labeled with their m/z values in standards (black), *S. pseudonitzschiae* F5 (red), and *Phaeobacter* sp. F10 (blue).

**Supplementary Table S1.** Putative IAA biosynthesis pathway in *S. pseudonitzschiae* F5

| <b>Gene annotation</b>                     | <b>Feature ID</b>           | <b>% ID*</b> | <b>Bit score*</b> |
|--------------------------------------------|-----------------------------|--------------|-------------------|
| IAM hydrolase [EC:3.5.1.4]                 | fig 1402135.21.peg.35<br>60 | 97.4         | 523               |
| Tryptophan 2-monooxygenase                 | fig 1402135.21.peg.35<br>59 | 100          | 1148              |
| Putative IpyA decarboxylase                | fig 1402135.21.peg.23<br>26 | 98.9         | 946               |
| Aldehyde dehydrogenase (NAD <sup>+</sup> ) | fig 1402135.21.peg.26<br>28 | 99.8         | 981               |
| Nitrile hydratase subunit alpha            | fig 1402135.21.peg.36<br>3  | 99.5         | 375               |
| Nitrile hydratase subunit beta             | fig 1402135.21.peg.36<br>2  | 100          | 452               |

\*Identity (% ID) and bit score refer to identity of homologs in *S. pseudonitzschia* F5 compared to *S. pseudonitzschia* SA11.



**Supplementary Table S2.** Homolog genes of *S. pseudonitzschiae* F5, *Phaeobacter* sp. F10, and *A. macleodii* F12 depicted in Figure 2 and their similarity to homologs in the genome of the model bacterium *Ruegeria pomeroyi* DSS-3. Complete annotation of each genome is provided as a separate supplementary file.

| Gene                      | Annotation                                                                                | <i>S. pseudonitzschiae</i> F5                     | % ID         | Bit score  | <i>Phaeobacter</i> sp. F10                                                               | % ID         | Bit score  | <i>A. macleodii</i> F12                          | % ID      | Bit score |
|---------------------------|-------------------------------------------------------------------------------------------|---------------------------------------------------|--------------|------------|------------------------------------------------------------------------------------------|--------------|------------|--------------------------------------------------|-----------|-----------|
| <b>Chemotaxis</b>         |                                                                                           |                                                   |              |            |                                                                                          |              |            |                                                  |           |           |
| <i>cheR</i>               | Chemotaxis protein methyltransferase                                                      | fig 1402135.21.peg.3438                           | -\$          | -          | fig 6666666.382773.peg.987<br>fig 6666666.382773.peg.2269                                | -            | -          | fig 28108.372.peg.1943                           | -         | -         |
|                           | Chemotaxis protein histidine kinase and related kinases                                   | fig 1402135.21.peg.1719                           | 53.4         | 111        | fig 6666666.382773.peg.1026                                                              | 65.7         | 134        | -                                                | -         | -         |
| <i>cheB</i>               | Chemotaxis response regulator protein-glutamate methylesterase CheB                       | -                                                 | -            | -          | fig 6666666.382773.peg.981<br>fig 6666666.382773.peg.2270                                | 33.3         | 55.8       | fig 28108.372.peg.361<br>fig 28108.372.peg.1933  | -<br>34.9 | -<br>63.2 |
| <i>cheY</i>               | Chemotaxis regulator - transmits chemoreceptor signals to flagellar motor components CheY | fig 1402135.21.peg.3437                           | -            | -          | fig 6666666.382773.peg.988                                                               | -            | -          | fig 28108.372.peg.1936<br>fig 28108.372.peg.1704 | -         | -         |
| <i>cheW</i>               | Positive regulator of CheA protein activity                                               | fig 1402135.21.peg.3439                           | -            | -          | fig 6666666.382773.peg.986<br>fig 6666666.382773.peg.2266<br>fig 6666666.382773.peg.2268 | -            | -          | fig 28108.372.peg.1930                           | -         | -         |
| <i>cheA</i>               | Signal transduction histidine kinase CheA                                                 | fig 1402135.21.peg.3440                           | -            | -          | fig 6666666.382773.peg.985<br>fig 6666666.382773.peg.2265                                | -            | -          | fig 28108.372.peg.1934                           | -         | -         |
| <i>cheD</i>               | Chemotaxis protein CheD                                                                   | fig 1402135.21.peg.3435                           | -            | -          | fig 6666666.382773.peg.980                                                               | -            | -          | -                                                | -         | -         |
| <b>Flagellar Proteins</b> |                                                                                           |                                                   |              |            |                                                                                          |              |            |                                                  |           |           |
| <i>motB</i>               | Flagellar motor rotation protein MotB                                                     | fig 1402135.21.peg.769<br>fig 1402135.21.peg.1597 | 55.8<br>53.8 | 626<br>223 | fig 6666666.382773.peg.243<br>fig 6666666.382773.peg.909                                 | 66.5<br>60.7 | 750<br>232 | fig 28108.372.peg.1443                           | -         | -         |

|             |                                                                                 |                         |           |      |                             |           |     |                        |   |
|-------------|---------------------------------------------------------------------------------|-------------------------|-----------|------|-----------------------------|-----------|-----|------------------------|---|
|             | MotA/TolQ/ExbB proton channel family protein, probably associated with flagella | fig 1402135.21.peg.770  | 69.5 (hp) | 515  | fig 6666666.382773.peg.244  | 75.7 (hp) | 569 | -                      | - |
| <i>flgN</i> | Flagellar biosynthesis protein FlgN                                             | fig 1402135.21.peg.1599 | 46.2 (hp) | 108  | fig 6666666.382773.peg.902  | 46.2 (hp) | 105 | -                      | - |
| <i>fliG</i> | Flagellar motor switch protein FliG                                             | fig 1402135.21.peg.134  | 56.8      | 328  | fig 6666666.382773.peg.2790 | 60.7      | 384 | -                      | - |
| <i>flgE</i> | Flagellar hook protein FlgE                                                     | fig 1402135.21.peg.1598 | 65.4      | 566  | -                           | -         | -   | fig 28108.372.peg.1939 | - |
| <i>flgJ</i> | Flagellar protein FlgJ, putative                                                | fig 1402135.21.peg.1600 | 65.7      | 95.5 | fig 6666666.382773.peg.901  | 73.5      | 103 | -                      | - |
|             | Flagellar motor switch protein                                                  | fig 1402135.21.peg.210  | 30.8 (hp) | 117  | fig 6666666.382773.peg.2711 | 36.5 (hp) | 159 | -                      | - |
| <i>flgD</i> | Flagellar basal-body rod modification protein FlgD                              | fig 1402135.21.peg.1602 | 56.9      | 229  | fig 6666666.382773.peg.899  | 51.5      | 213 | -                      | - |
| <b>Pili</b> |                                                                                 |                         |           |      |                             |           |     |                        |   |
|             | bacterial type II/III secretion system protein                                  | fig 1402135.21.peg.2422 | 33.1      | 185  | fig 6666666.382773.peg.2057 | 75.4      | 444 | -                      | - |
|             | Predicted ATPase with chaperone activity, associated with Flp pilus assembly    | fig 1402135.21.peg.2680 | 82.3 (hp) | 758  | fig 6666666.382773.peg.2048 | 84.8 (hp) | 786 | -                      | - |
| <i>tadC</i> | type II/IV secretion system protein, TadC subfamily                             | fig 1402135.21.peg.2426 | -         | -    | fig 6666666.382773.peg.2053 | 75.2      | 504 | -                      | - |
|             |                                                                                 | fig 1402135.21.peg.2685 | 78.1      | 514  | fig 6666666.382773.peg.2052 | 72.4      | 484 | -                      | - |
|             |                                                                                 | fig 1402135.21.peg.2684 | 68.9      | 436  | -                           | -         | -   | -                      | - |
| <i>tadA</i> | type II/IV secretion system protein, TadA subfamily                             | fig 1402135.21.peg.2425 | 50.5      | 391  | fig 6666666.382773.peg.2054 | 86.0      | 827 | -                      | - |
|             |                                                                                 | fig 1402135.21.peg.2686 | 82.5      | 784  | -                           | -         | -   | -                      | - |
|             | Type II/IV secretion system ATPase                                              | fig 1402135.21.peg.2687 | 72.5      | 632  | fig 6666666.382773.peg.2055 | 74.0      | 649 | -                      | - |
|             |                                                                                 | fig 1402135.21.peg.2424 | -         | -    | -                           | -         | -   | -                      | - |

|                           |                                                                                                 |                                                    |              |             |                                                             |              |             |                        |      |     |
|---------------------------|-------------------------------------------------------------------------------------------------|----------------------------------------------------|--------------|-------------|-------------------------------------------------------------|--------------|-------------|------------------------|------|-----|
|                           | TadZ/CpaE,<br>associated with Flp<br>pilus assembly                                             |                                                    |              |             |                                                             |              |             |                        |      |     |
| <i>tadG</i>               | Flp pilus assembly<br>protein TadG                                                              | fig 1402135.21.peg.893                             | 39.1         | 132<br>(hp) | fig 6666666.382773.peg.2304                                 | 44.6         | 171<br>(hp) | -                      | -    |     |
|                           | ATP-dependent<br>helicase,<br>DEAD/DEAH box<br>family, associated<br>with Flp pilus<br>assembly | fig 1402135.21.peg.2679                            | 81.8         | 1344        | fig 6666666.382773.peg.2047                                 | 77.4         | 1279        | -                      | -    |     |
| <i>tadD</i>               | Flp pilus assembly<br>protein TadD,<br>contains TPR repeat                                      | fig 1402135.21.peg.2682<br>fig 1402135.21.peg.2683 | 75.8<br>59.1 | 449<br>218  | fig 6666666.382773.peg.2050;<br>fig 6666666.382773.peg.2051 | 71.7<br>58.2 | 418<br>210  | -                      | -    |     |
|                           | Flp pilus assembly<br>protein RcpC/CpaB                                                         | fig 1402135.21.peg.2690                            | 68.4         | 395         | fig 6666666.382773.peg.2058                                 | 70.9         | 416         | -                      | -    |     |
|                           | Flp pilus assembly<br>protein, pilin Flp                                                        | fig 1402135.21.peg.2420<br>fig 1402135.21.peg.2692 | -<br>-       | -<br>-      | fig 6666666.382773.peg.2060                                 | -            | -           | fig 28108.372.peg.1117 | -    |     |
|                           | Type IV prepilin<br>peptidase<br>TadV/CpaA                                                      | fig 1402135.21.peg.2681                            | 51.9         | 154         | fig 6666666.382773.peg.2049                                 | 48.6         | 123         | -                      | -    |     |
| <b>Exopolysaccharides</b> |                                                                                                 |                                                    |              |             |                                                             |              |             |                        |      |     |
|                           | bacterial sugar<br>transferase                                                                  | fig 1402135.21.peg.2078<br>fig 1402135.21.peg.1856 | 48.1<br>35.8 | 253<br>224  | fig 6666666.382773.peg.3316                                 | 65.6         | 253         | fig 28108.372.peg.1531 | 34.9 | 244 |
|                           | polysaccharide<br>biosynthesis/export<br>protein                                                | fig 1402135.21.peg.873                             | 71.9         | 377         | fig 6666666.382773.peg.2324                                 | 82.4         | 375         | -                      | -    |     |
| <i>kpsC</i>               | capsular<br>polysaccharide<br>export protein<br>KpsC                                            | fig 1402135.21.peg.874                             | 67.0         | 667         | fig 6666666.382773.peg.2323                                 | 70.4         | 667         | -                      | -    |     |
|                           | Glycosyl<br>transferase, group 2<br>family protein                                              | fig 1402135.21.peg.303                             | 54.6         | 628         | fig 6666666.382773.peg.420                                  | 50.1         | 637         | -                      | -    |     |
| <i>kpsS</i>               | Capsular<br>polysaccharide<br>export system<br>protein KpsS                                     | fig 1402135.21.peg.872                             | 75.1         | 430         | fig 6666666.382773.peg.2325                                 | 77.7         | 430         | -                      | -    |     |

|                                 |                                                                                  |                         |      |      |                              |      |     |                       |           |
|---------------------------------|----------------------------------------------------------------------------------|-------------------------|------|------|------------------------------|------|-----|-----------------------|-----------|
|                                 | Glycosyl transferase, group 1 family protein                                     | fig 1402135.21.peg.2297 | 72.6 | 413  | fig 66666666.382773.peg.732  | 74.3 | 413 | -                     | -         |
| <b>Quorum sensing</b>           |                                                                                  |                         |      |      |                              |      |     |                       |           |
| <i>luxRI</i> cassette (B group) | Autoinducer-binding transcriptional regulator and adjacent autoinducer synthesis | fig 1402135.21.peg.2496 | 67.9 | 304  | fig 66666666.382773.peg.1880 | 73.6 | 318 | -                     | -         |
|                                 |                                                                                  | fig 1402135.21.peg.2495 | 68.1 | 344  | fig 66666666.382773.peg.1879 | 73.2 | 381 |                       |           |
| <i>luxRI</i> cassette           | Autoinducer-binding transcriptional regulator and adjacent autoinducer synthesis | fig 1402135.21.peg.2198 | 71.2 | 313  | -                            | -    | -   |                       |           |
|                                 |                                                                                  | fig 1402135.21.peg.2199 | 60.8 | 290  |                              |      |     |                       |           |
| Orphan <i>luxR</i>              | Autoinducer-binding transcriptional regulator, LuxR family                       | fig 1402135.21.peg.3467 | 71.5 | 382; | fig 66666666.382773.peg.2975 | 68.3 | 363 | -                     | -         |
|                                 | DNA-binding response regulator, LuxR family                                      | fig 1402135.21.peg.2410 | 52.2 | 204  | fig 66666666.382773.peg.3362 | 62.6 | 249 | -                     | -         |
|                                 |                                                                                  | fig 1402135.21.peg.3268 | 76.6 | 325  | fig 66666666.382773.peg.2638 | 83.2 | 353 |                       |           |
|                                 | Transcriptional regulator, LuxR family                                           | -                       | -    | -    | fig 66666666.382773.peg.668  | 44.3 | 108 | fig 28108.372.peg.736 | 31.7 69.3 |
|                                 |                                                                                  |                         |      |      | fig 66666666.382773.peg.2699 | 38.0 | 108 |                       |           |

Further confirmation for gene annotations were acquired by blasting genes against the model *Roseobacter* group bacterium *Ruegeria pomeroyi* DSS-3 (Hit score > 50)

§ Indicates no hits were found in the *R. pomeroyi* DSS3 genome.

¶ Indicates that the gene annotation in *R. pomeroyi* DSS3 is 'hypothetical protein'.

**Supplementary Table S3.** AHL molecules listed in Figure 5.

| <b>Strains</b>                             | <b>No. of<br/><i>luxIs</i></b> | <b>AHLs</b>                                                                                                                                                                                            | <b>References</b> |
|--------------------------------------------|--------------------------------|--------------------------------------------------------------------------------------------------------------------------------------------------------------------------------------------------------|-------------------|
| <i>Phaeobacter</i> sp. F10                 | 1                              | 3-oxo-C <sub>10</sub> -HSL, 3-oxo-C <sub>16</sub> -HSL, 3-oxo-C <sub>16:1</sub> -HSL                                                                                                                   | This study        |
| <i>Rhodobacterales bacterium</i> Y4I       | 2                              | C <sub>8</sub> -HSL, 3-OH-C <sub>12:1</sub> -HSL                                                                                                                                                       | [1]               |
| <i>Phaeobacter gallaeciensis</i> DSM 26640 | 3                              | 3-OH-C <sub>10</sub> -HSL, C <sub>12:1</sub> -HSL, C <sub>14:2</sub> -HSL, C <sub>16:1</sub> -HSL, C <sub>16:2</sub> -HSL, 3-oxo-C <sub>16</sub> -HSL, C <sub>18:1</sub> -HSL, C <sub>18:2</sub> -HSL, | [4]               |
| <i>Phaeobacter gallaeciensis</i> DSM 17395 | 2                              | 3-OH-C <sub>10</sub> -HSL, C <sub>16</sub> -HSL, C <sub>16:1</sub> -HSL, C <sub>18:1</sub> -HSL                                                                                                        | [5]               |
| <i>Phaeobacter inhibens</i> 2.10           | 3                              | 3-OH-C <sub>10</sub> -HSL, 3-oxo-C <sub>10</sub> -HSL, C <sub>12:2</sub> -HSL, C <sub>16</sub> -HSL, C <sub>16:1</sub> -HSL, C <sub>18:1</sub> -HSL                                                    | [5]               |
| <i>Ruegeria</i> sp. KLH11                  | 3                              | 3-OH-C <sub>14</sub> -HSL, 3-OH-C <sub>14:1</sub> -HSL, 3-OH-C <sub>12</sub> -HSL                                                                                                                      | [9]               |
| <i>Dinoroseobacter shibae</i> DFL 12       | 3                              | C <sub>14:1</sub> -HSL, 3-oxo-C <sub>14</sub> -HSL, C <sub>18:1</sub> -HSL, C <sub>18:2</sub> -HSL                                                                                                     | [5]               |
| <i>Rhodobacteraceae bacterium</i> PD-2     | 2                              | 3-oxo-C <sub>8</sub> -HSL, 3-oxo-C <sub>10</sub> -HSL                                                                                                                                                  | [14]              |
| <i>Sulfitobacter pseudonitzschiae</i> F5   | 2                              | 3-oxo-C <sub>10</sub> -HSL, 3-oxo-C <sub>16</sub> -HSL, 3-oxo-C <sub>16:1</sub> -HSL                                                                                                                   | This study        |
| <i>Pseudomonas aeruginosa</i> PAO1         | 2                              | C <sub>4</sub> -HSL, 3-oxo-C <sub>12</sub> -HSL                                                                                                                                                        | [13]              |

**Supplementary Table S4.** Purchased AHLs standards used to identify AHLs produced by the roseobacters strains using HPLC-MS/MS.

| <b>AHL standards</b>                             | <b>Future ID</b>             |
|--------------------------------------------------|------------------------------|
| Acetyl-L-Homoserine lactone                      | C <sub>2</sub> -HSL          |
| N-butyryl-L-Homoserine lactone                   | C <sub>4</sub> -HSL          |
| N-hexanoyl-L-Homoserine lactone                  | C <sub>6</sub> -HSL          |
| N-(β-Ketocaproyl)-DL-homoserine lactone          | 3-oxo-C <sub>6</sub> -HSL    |
| N-phenylacetyl-L-Homoserine lactone              | C <sub>8</sub> -HSL          |
| N-(3-Oxo-octanoyl)-L-homoserine lactone          | 3-oxo-C <sub>8</sub> -HSL    |
| N-(3-Oxodecanoyl)-L-homoserine lactone           | 3-oxo-C <sub>10</sub> -HSL   |
| N-dodecanoyl-L-Homoserine lactone                | C <sub>12</sub> -HSL         |
| N-(3-Oxododecanoyl)-L-homoserine lactone         | 3-oxo-C <sub>12</sub> -HSL   |
| N-tetradecanoyl-L-Homoserine lactone             | C <sub>14</sub> -HSL         |
| N-3-oxo-tetradecanoyl-L-Homoserine lactone       | 3-oxo-C <sub>14</sub> -HSL   |
| N-hexadecanoyl-L-Homoserine lactone              | C <sub>16</sub> -HSL         |
| N-3-oxo-hexadec-11(Z)-enoyl-L-Homoserine lactone | 3-oxo-C <sub>16:1</sub> -HSL |
| N-3-oxo-hexadecanoyl-L-Homoserine lactone        | 3-oxo-C <sub>16</sub> -HSL   |
| N-octadecanoyl-L-Homoserine lactone              | C <sub>18</sub> -HSL         |

## Reference (including full references in Figure 5 and Supplementary Table S3)

1. Cude WN, Prevatte CW, Hadden MK, May AL, Smith RT, Swain CL *et al.* *Phaeobacter* sp. strain Y4I utilizes two separate cell-to-cell communication systems to regulate production of the antimicrobial indigoidine. *Appl Environ Microbiol.* 2015; 81(4):1417-1425.
2. Rodrigo-Torres L, Pujalte MJ, Arahal DR. Draft genome of *Leisingera aquaemixtae* CECT 8399T, a member of the *Roseobacter* clade isolated from a junction of fresh and ocean water in Jeju Island, South Korea. *Genomics data.* 2016; 7:233-236.
3. Michael V, Frank O, Bartling P, Scheuner C, Goker M, Brinkmann H *et al.* Biofilm plasmids with a rhamnose operon are widely distributed determinants of the 'swim-or-stick' lifestyle in roseobacters. *ISME J.* 2016; 10(10):2498-2513.
4. Ziesche L, Bruns H, Dogs M, Wolter L, Mann F, Wagner-Dobler I *et al.* Homoserine Lactones, Methyl Oligohydroxybutyrates, and Other Extracellular Metabolites of Macroalgae-Associated Bacteria of the *Roseobacter* Clade: Identification and Functions. *Chembiochem.* 2015; 16(14):2094-2107.
5. Ziesche L, Rinkel J, Dickschat JS, Schulz S. Acyl-group specificity of AHL synthases involved in quorum-sensing in *Roseobacter* group bacteria. *Beilstein journal of organic chemistry.* 2018; 14(1):1309-1316.
6. Thole S, Kalhoefer D, Voget S, Berger M, Engelhardt T, Liesegang H *et al.* *Phaeobacter gallaeciensis* genomes from globally opposite locations reveal high similarity of adaptation to surface life. *The ISME journal.* 2012; 6(12):2229.
7. Slightom RN, Buchan A. Surface colonization by marine roseobacters: integrating genotype and phenotype. *Appl Environ Microbiol.* 2009; 75(19):6027-6037.
8. Zan J, Liu Y, Fuqua C, Hill RT. Acyl-homoserine lactone quorum sensing in the *Roseobacter* clade. *Int J Mol Sci.* 2014; 15(1):654-669.
9. Zan J, Cicirelli EM, Mohamed NM, Sibhatu H, Kroll S, Choi O *et al.* A complex LuxR-LuxI type quorum sensing network in a roseobacterial marine sponge symbiont activates flagellar motility and inhibits biofilm formation. *Mol Microbiol.* 2012; 85(5):916-933.
10. Bartling P, Vollmers J, Petersen J. The first world swimming championships of roseobacters- Phylogenomic insights into an exceptional motility phenotype. *Syst Appl Microbiol.* 2018; 41(6):544-554.
11. Wang B, Tan T, Shao Z. *Roseovarius pacificus* sp. nov., isolated from deep-sea sediment. *International journal of systematic and evolutionary microbiology.* 2009; 59(5):1116-1121.
12. Bruhn JB, Nielsen KF, Hjelm M, Hansen M, Bresciani J, Schulz S *et al.* Ecology, inhibitory activity, and morphogenesis of a marine antagonistic bacterium belonging to the *Roseobacter* clade. *Appl Environ Microbiol.* 2005; 71(11):7263-7270.
13. Overhage J, Lewenza S, Marr AK, Hancock RE. Identification of genes involved in swarming motility using a *Pseudomonas aeruginosa* PAO1 mini-Tn5-lux mutant library. *Journal of bacteriology.* 2007; 189(5):2164-2169.
14. Chi W, Zheng L, He C, Han B, Zheng M, Gao W *et al.* Quorum sensing of microalgae associated marine *Ponticoccus* sp. PD-2 and its algicidal function regulation. *AMB Express.* 2017; 7(1):1-10.
